# Supplementary material
Source: PubMed Central journal article supplement (PMC2673050)
Supplement: NIHMS100558-supplement-1_si_001.pdf [file NIHMS100558-supplement-1_si_001.pdf]

**Synthesis of Casimiroin and Optimization of Its Quinone Reductase 2 and  
Aromatase Inhibitory Activity**

Arup Maiti,<sup>†</sup> Megan Sturdy,<sup>‡</sup> Laura Marler,<sup>§</sup> Scott D. Pegan,<sup>‡</sup> Andrew D. Mesecar,<sup>‡</sup>  
John M. Pezzuto,<sup>§</sup> and Mark Cushman<sup>\*†</sup>

*Department of Medicinal Chemistry and Molecular Pharmacology, School of Pharmacy and  
Pharmaceutical Sciences, and the Purdue Cancer Center, Purdue University, West Lafayette, IN  
47907, Center for Pharmaceutical Biotechnology and Department of Medicinal Chemistry and  
Pharmacognosy, College of Pharmacy, The University of Illinois at Chicago, Chicago, IL 6060,  
College of Pharmacy, University of Hawaii at Hilo, Hilo, Hawaii, 96720.*

|                                                                                                                                                                       |        |
|-----------------------------------------------------------------------------------------------------------------------------------------------------------------------|--------|
| Title Page                                                                                                                                                            | S1     |
| Elemental Analyses                                                                                                                                                    | S2     |
| <sup>1</sup> H NMR and <sup>13</sup> C NMR Spectrum of compounds <b>1, 1a-r, 2, 3a-b, 3g-h, 3i-j, 3m-q,</b><br><b>6a, 6g, 6i, 6m, 6o, 7a, 7g, 7i, 7m, 7o, 8 and 9</b> | S3-S63 |

\*To whom correspondence should be addressed: Phone: 765-494-1465; fax: 765-494-6790, e-mail [cushman@pharmacy.purdue.edu](mailto:cushman@pharmacy.purdue.edu)

<sup>†</sup>Purdue University

<sup>‡</sup>University of Illinois at Chicago

<sup>§</sup>University of Hawaii at Hilo

### Elemental Analyses

| Compound  | Formula                            | Calcd.                     | Found                      |
|-----------|------------------------------------|----------------------------|----------------------------|
| <b>1</b>  | $C_{12}H_{11}NO_4$                 | C, 61.80; H, 4.75; N, 6.01 | C, 61.65; H, 4.58; N, 5.96 |
| <b>1a</b> | $C_{11}H_9NO_3$                    | C, 65.02; H, 4.46; N, 6.89 | C, 64.65; H, 4.30; N, 6.86 |
| <b>1b</b> | $C_{12}H_{11}NO_3$                 | C, 66.35; H, 5.10; N, 6.45 | C, 66.10; H, 5.04; N, 6.36 |
| <b>1c</b> | $C_{10}H_9NO \cdot 0.1 H_2O$       | C, 74.61; H, 5.76; N, 8.70 | C, 74.50; H, 5.40; N, 8.64 |
| <b>1d</b> | $C_{11}H_{11}NO \cdot 1.0 H_2O$    | C, 69.09; H, 6.85; N, 7.32 | C, 68.79; H, 6.94; N, 6.91 |
| <b>1e</b> | $C_{11}H_{11}NO_2$                 | C, 69.83; H, 5.86; N, 7.40 | C, 69.94; H, 5.75; N, 7.47 |
| <b>1f</b> | $C_{12}H_{13}NO_2$                 | C, 70.92; H, 6.45; N, 6.89 | C, 70.94; H, 6.48; N, 6.75 |
| <b>1g</b> | $C_{12}H_{13}NO_3$                 | C, 65.74; H, 5.98; N, 6.39 | C, 65.65; H, 5.67; N, 6.27 |
| <b>1h</b> | $C_{13}H_{15}NO_3$                 | C, 66.94; H, 6.48; N, 6.00 | C, 66.85; H, 6.35; N, 5.71 |
| <b>1i</b> | $C_{12}H_{13}NO_3$                 | C, 65.74; H, 5.98; N, 6.39 | C, 65.37; H, 5.80; N, 6.23 |
| <b>1j</b> | $C_{13}H_{15}NO_3$                 | C, 66.94; H, 6.48; N, 6.00 | C, 67.11; H, 6.56; N, 5.99 |
| <b>1k</b> | $C_{12}H_{13}NO_3 \cdot 0.75 H_2O$ | C, 61.93; H, 6.28; N, 6.02 | C, 61.85; H, 6.74; N, 5.79 |
| <b>1l</b> | $C_{13}H_{15}NO_3$                 | C, 66.94; H, 6.48; N, 6.00 | C, 66.85; H, 6.50; N, 5.91 |
| <b>1m</b> | $C_{13}H_{15}NO_4$                 | C, 62.64; H, 6.07; N, 5.62 | C, 62.39; H, 5.88; N, 5.37 |
| <b>1n</b> | $C_{14}H_{17}NO_4$                 | C, 63.87; H, 6.51; N, 5.32 | C, 64.13; H, 6.62; N, 5.11 |
| <b>1o</b> | $C_{13}H_{15}NO_4$                 | C, 62.64; H, 6.07; N, 5.62 | C, 62.69; H, 6.26; N, 5.66 |
| <b>1p</b> | $C_{14}H_{17}NO_4$                 | C, 63.87; H, 6.51; N, 5.32 | C, 63.91; H, 6.60; N, 5.16 |
| <b>1q</b> | $C_{14}H_{17}NO_5$                 | C, 60.21; H, 6.14; N, 5.02 | C, 60.26; H, 6.10; N, 4.99 |
| <b>1r</b> | $C_{15}H_{19}NO_5$                 | C, 61.42; H, 6.53; N, 4.78 | C, 61.37; H, 6.48; N, 4.71 |

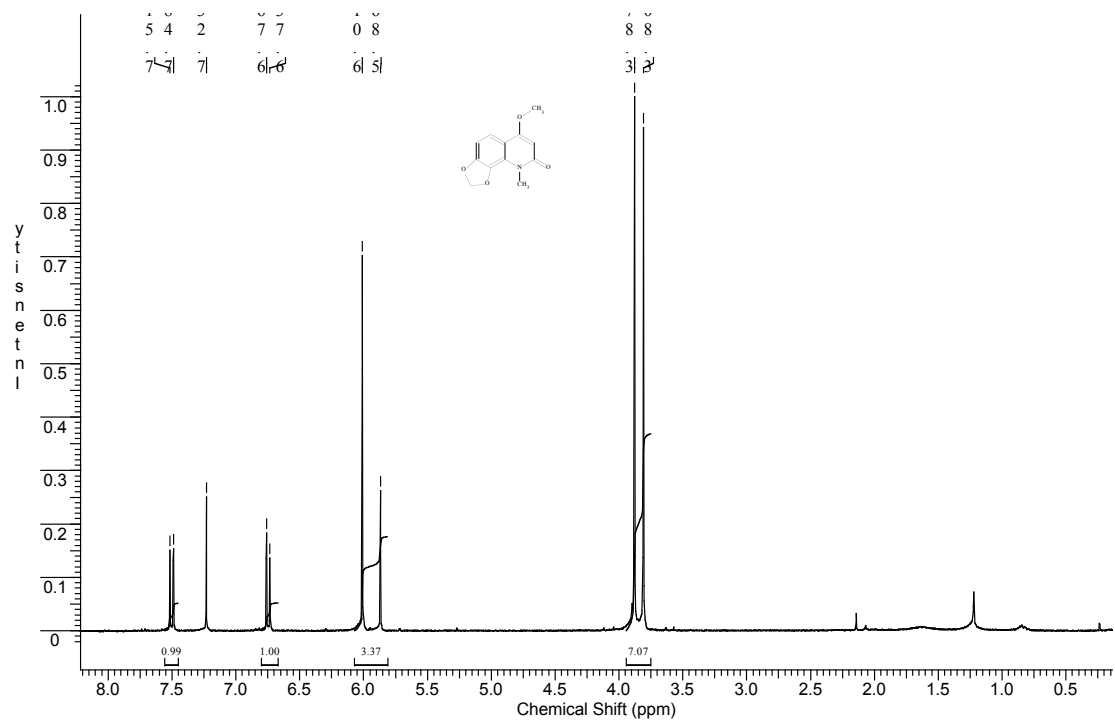

**<sup>1</sup>H NMR (CDCl<sub>3</sub>, 300 MHz) of Compound 1**

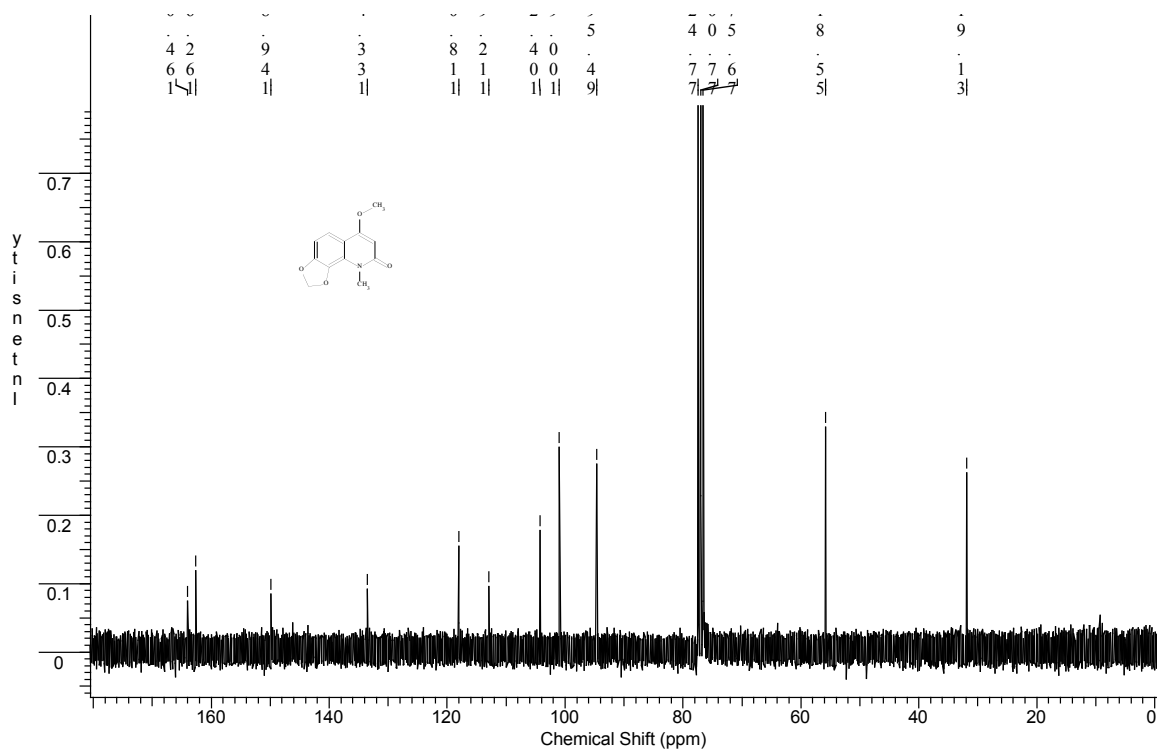

**<sup>13</sup>C NMR (CDCl<sub>3</sub>, 75 MHz) of Compound 1**



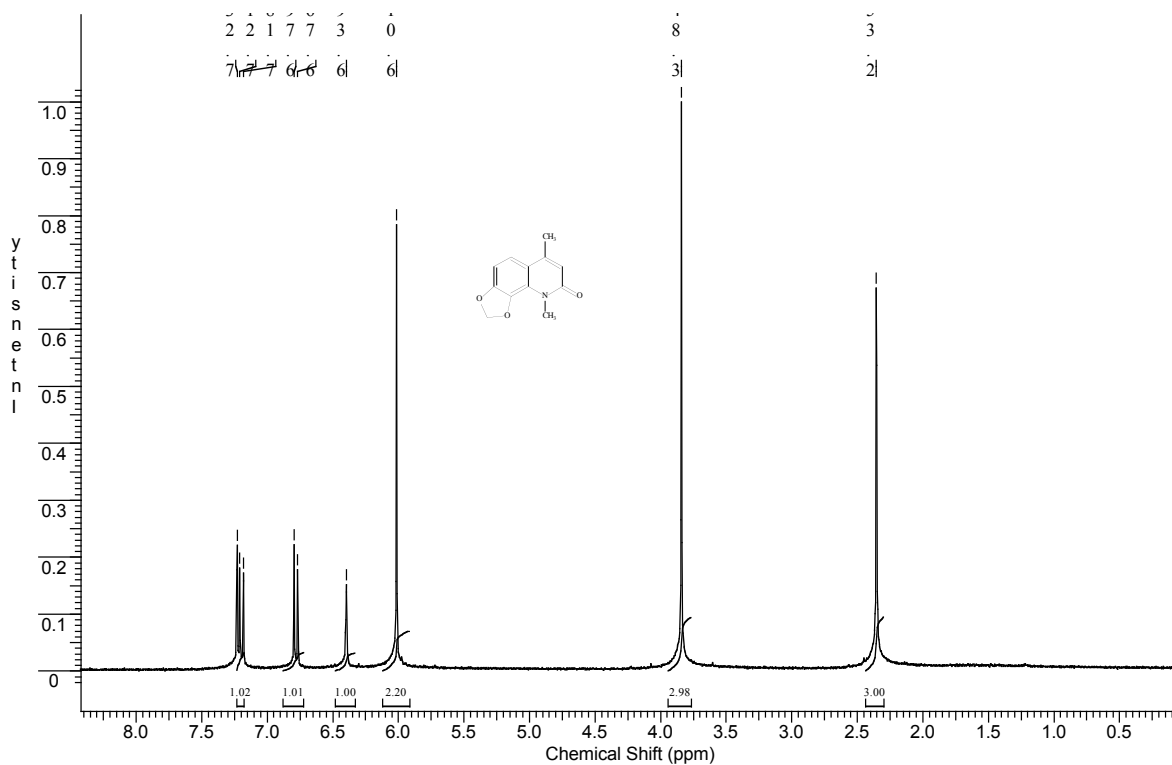

**<sup>1</sup>H NMR (CDCl<sub>3</sub>, 300 MHz) of Compound 1b**

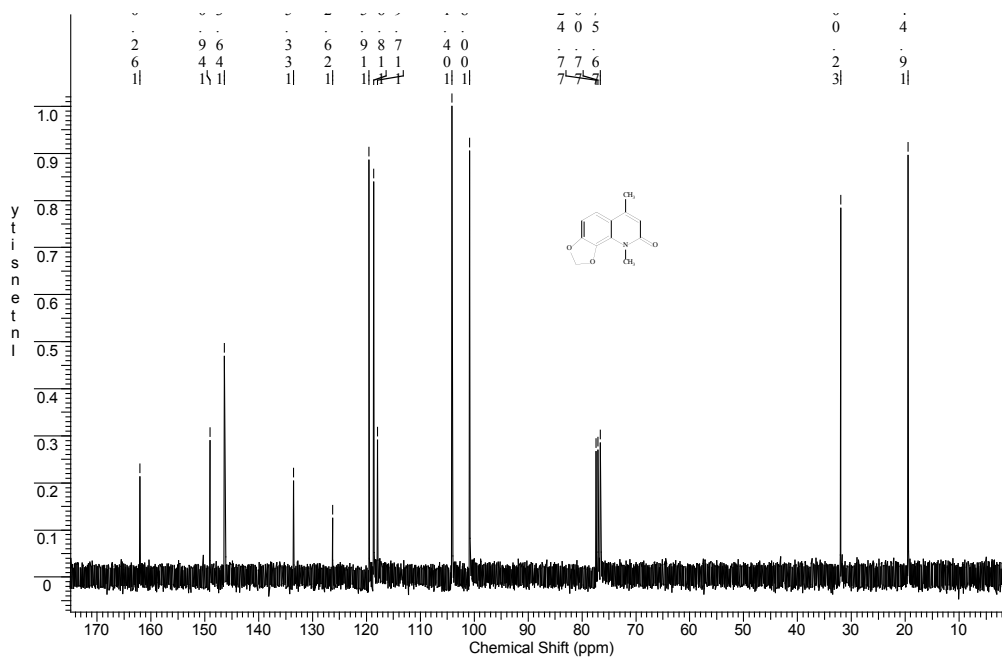

**<sup>13</sup>C NMR (CDCl<sub>3</sub>, 75 MHz) of Compound 1b**

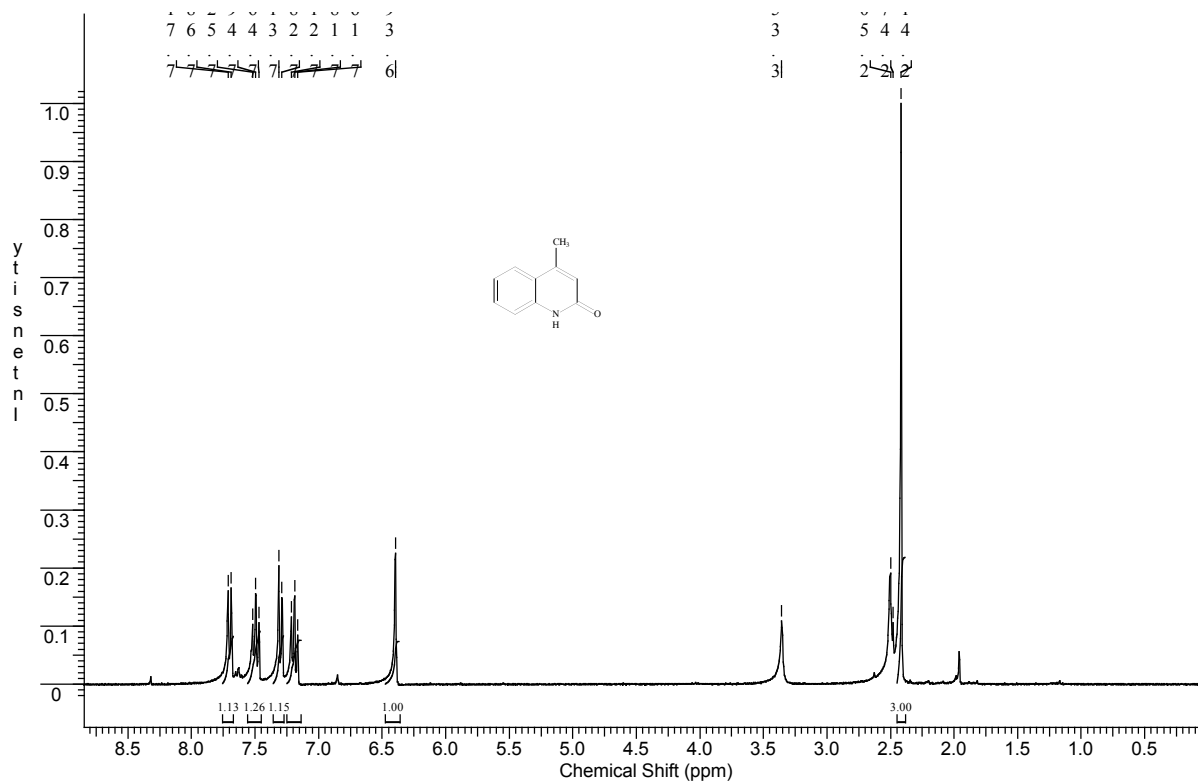

**<sup>1</sup>H NMR (DMSO-d<sub>6</sub>, 300 MHz) of Compound 1c**

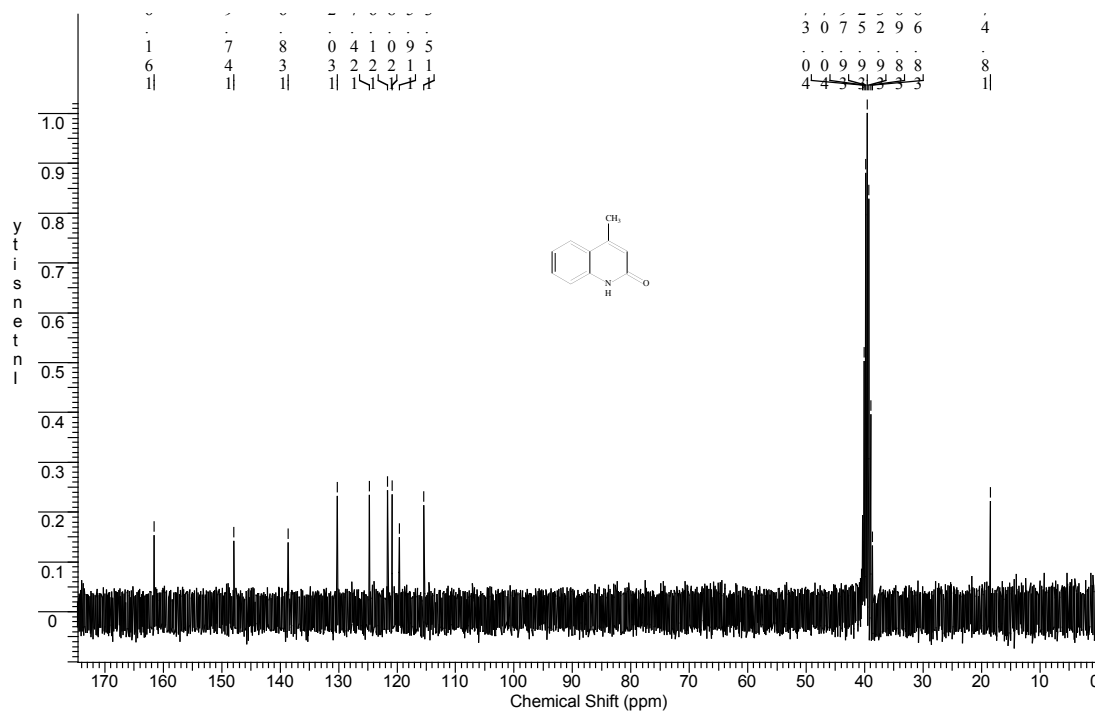

**<sup>13</sup>C NMR (DMSO-d<sub>6</sub>, 75 MHz) of Compound 1c**

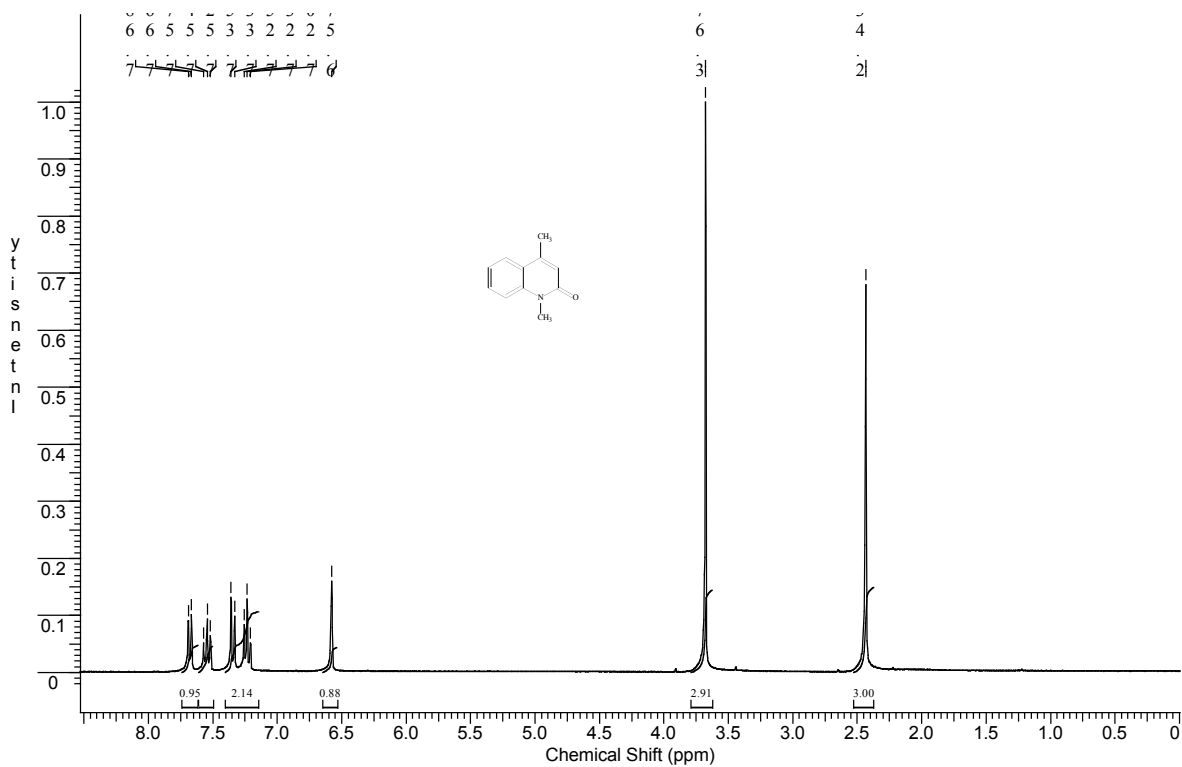

**<sup>1</sup>H NMR (CDCl<sub>3</sub>, 300 MHz) of Compound 1d**

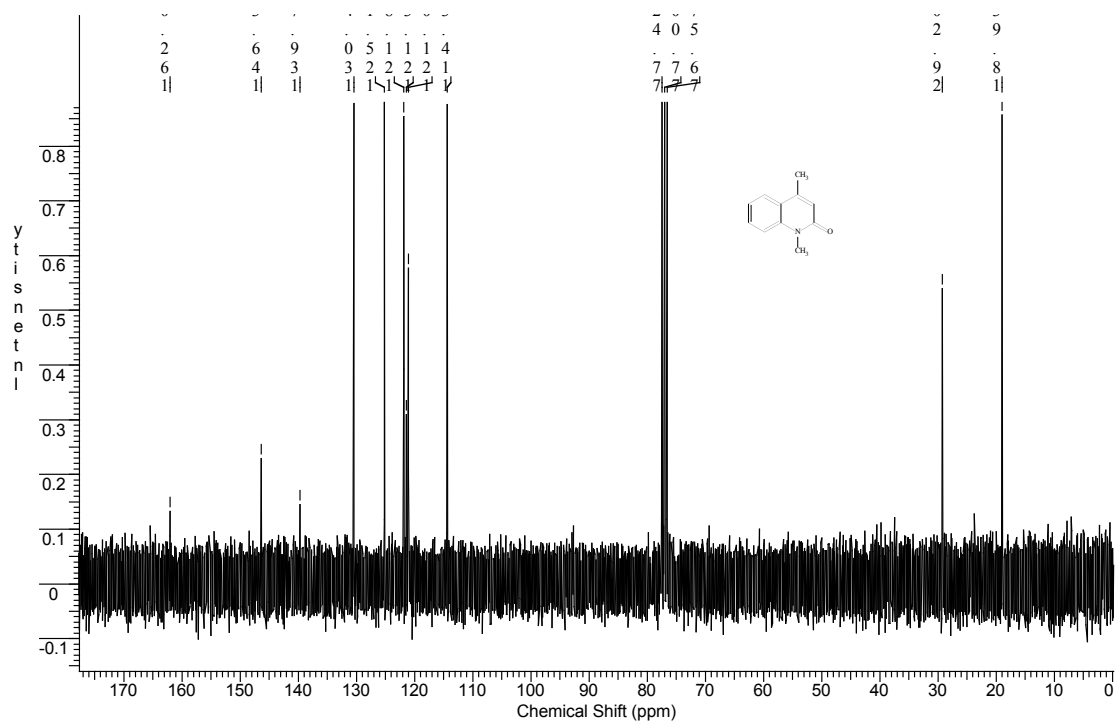

**<sup>13</sup>C NMR (CDCl<sub>3</sub>, 75 MHz) of Compound 1d**

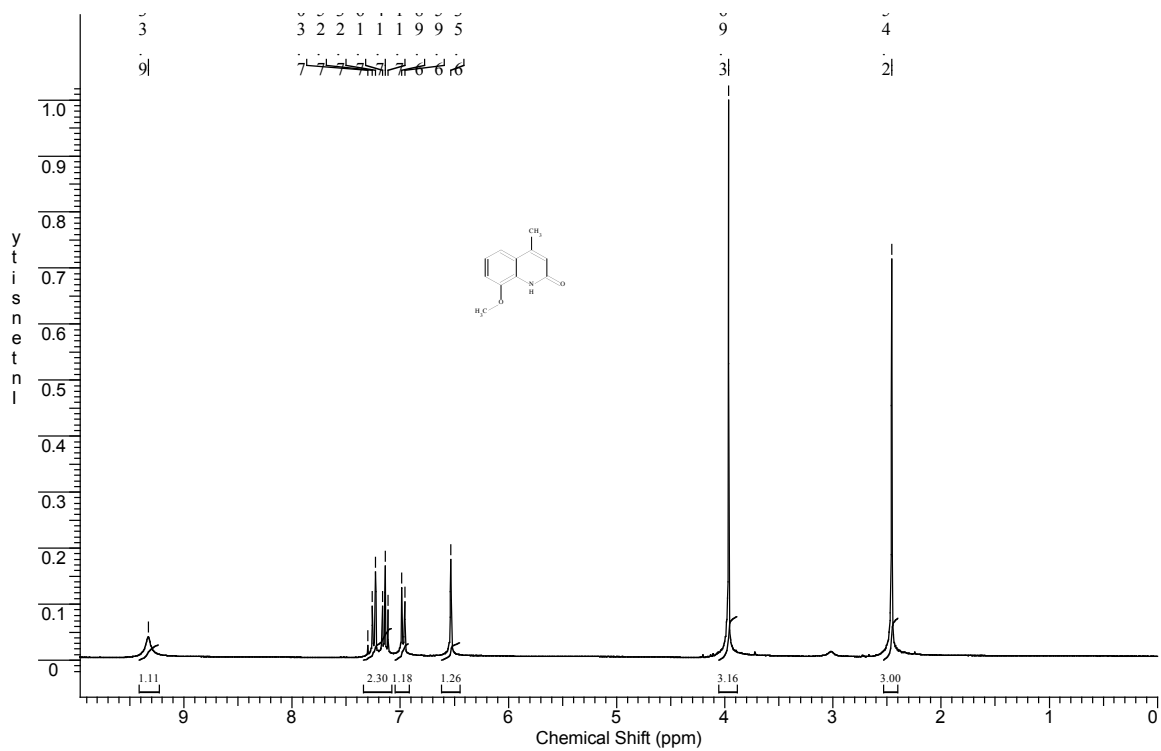

**<sup>1</sup>H NMR (CDCl<sub>3</sub>, 300 MHz) of Compound 1e**

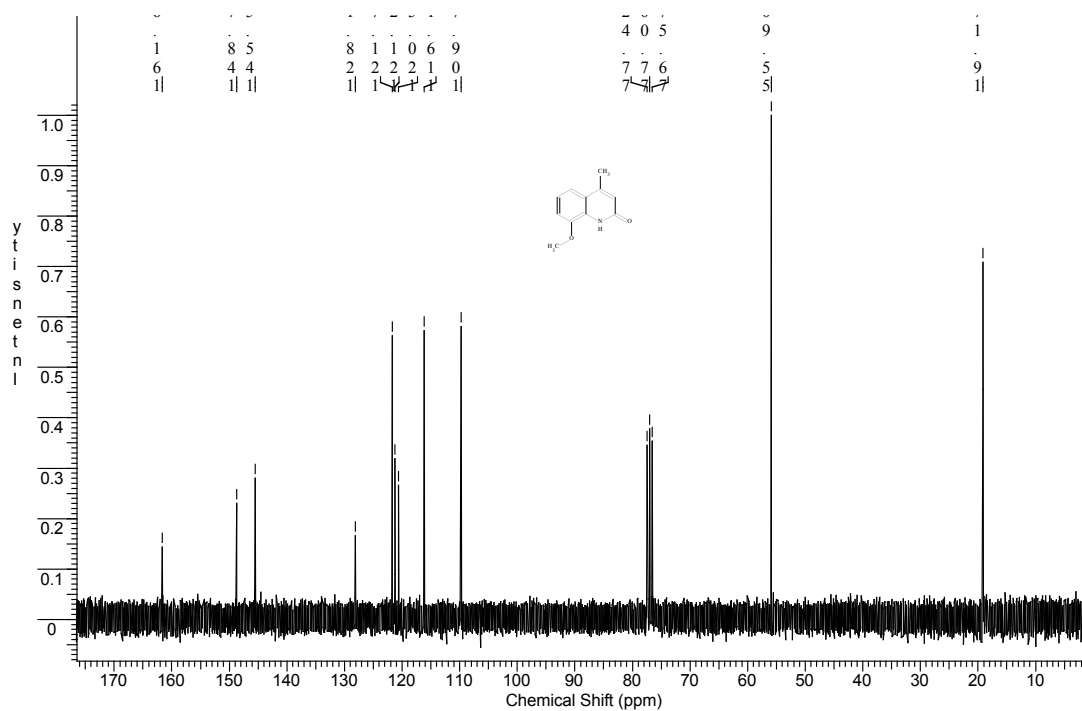

**<sup>13</sup>C NMR (CDCl<sub>3</sub>, 75 MHz) of Compound 1e**



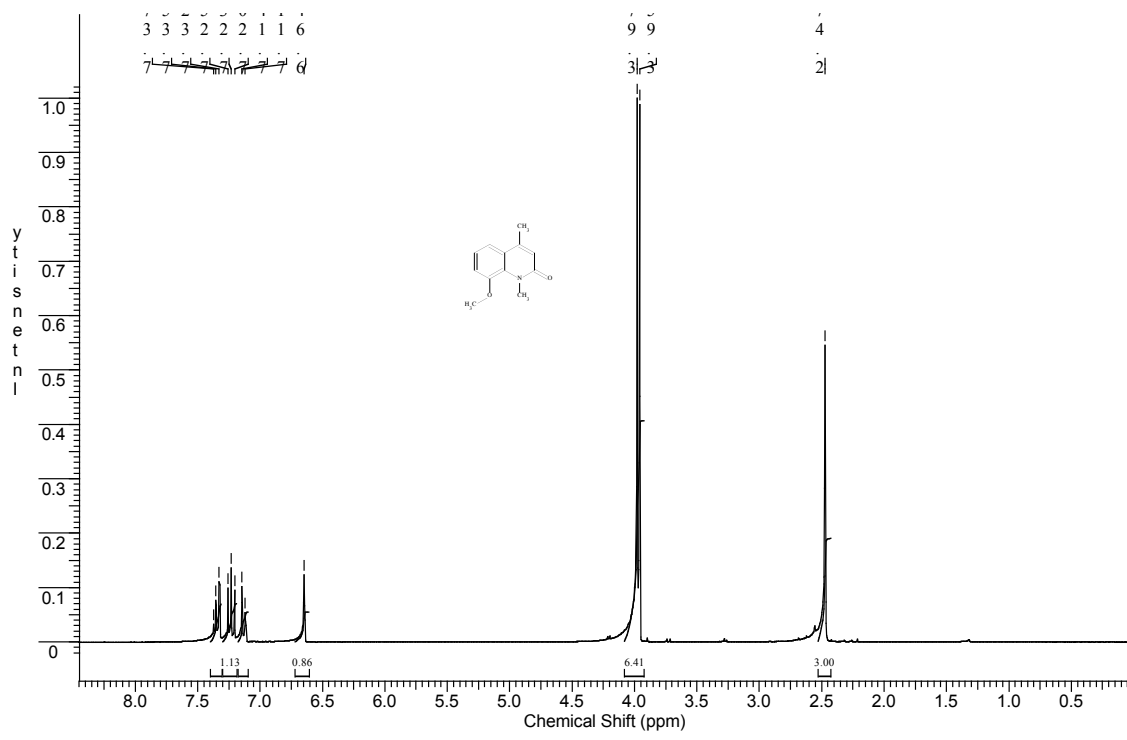

**<sup>1</sup>H NMR (CDCl<sub>3</sub>, 300 MHz) of Compound 1f**

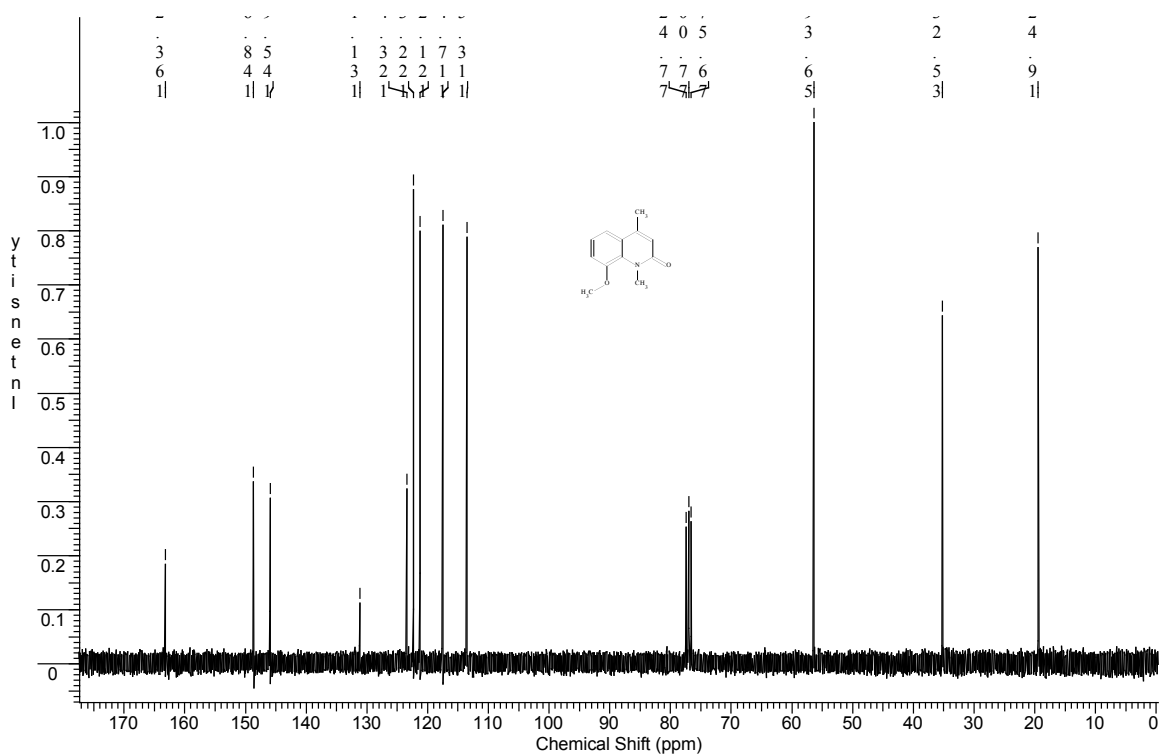

**<sup>13</sup>C NMR (CDCl<sub>3</sub>, 75 MHz) of Compound 1f**

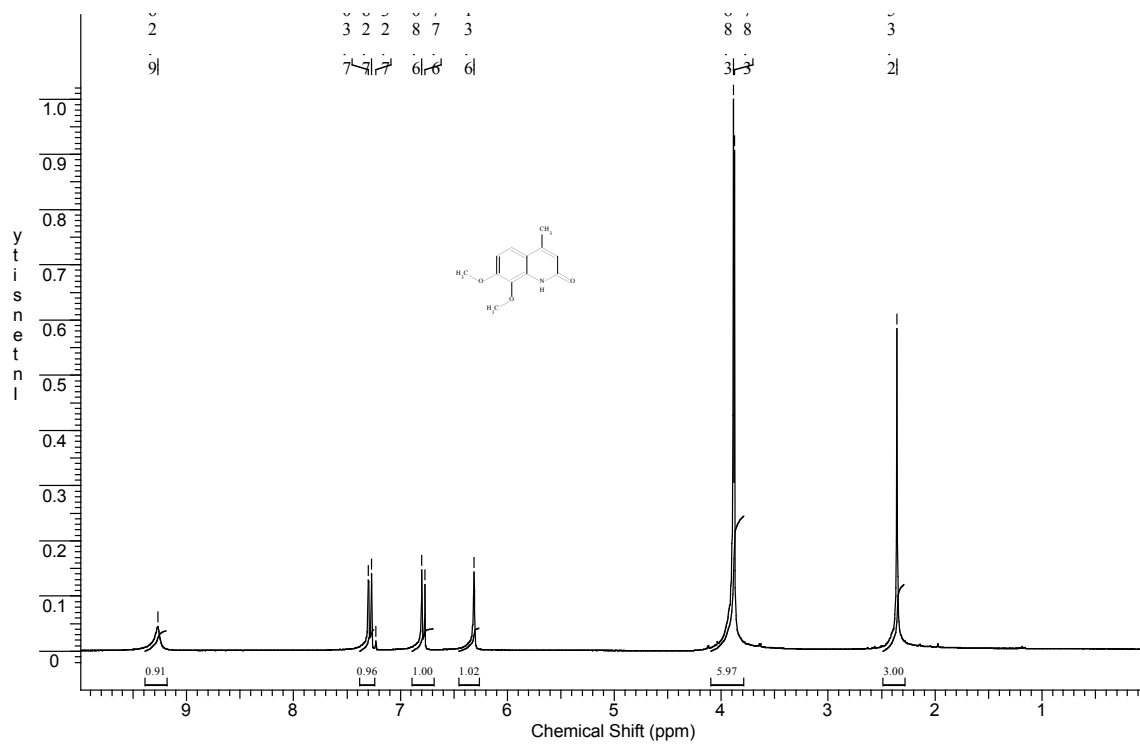

**<sup>1</sup>H NMR (CDCl<sub>3</sub>, 300 MHz) of Compound 1g**

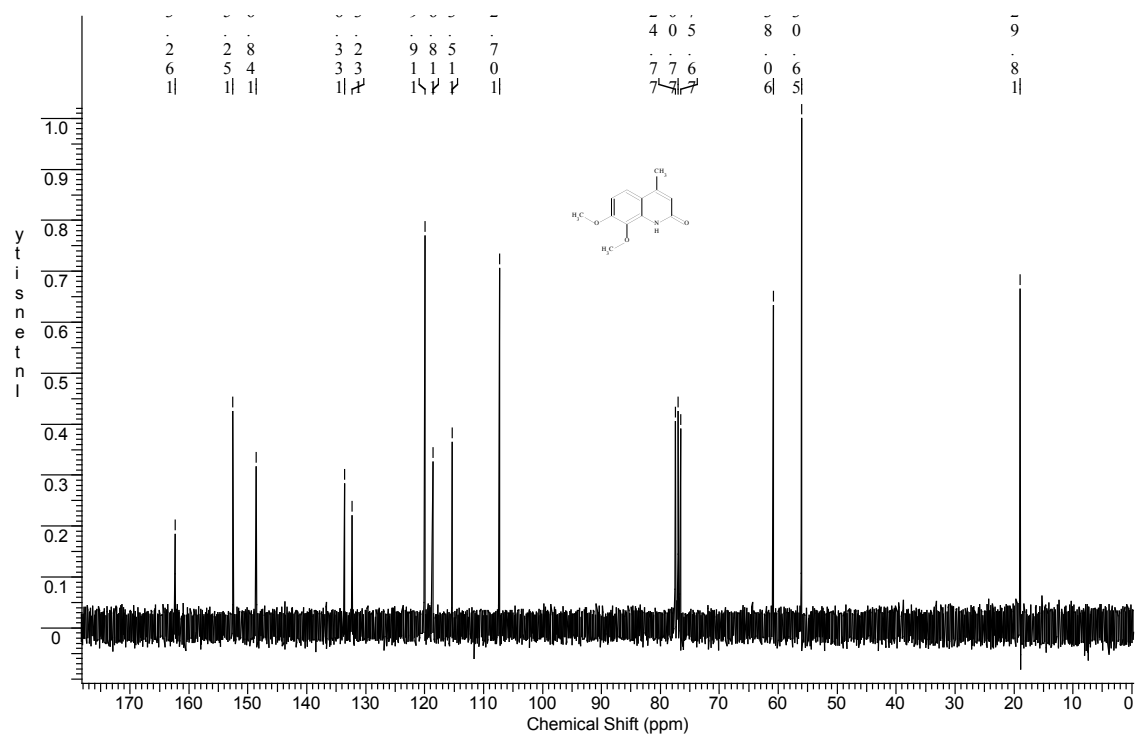

**<sup>13</sup>C NMR (CDCl<sub>3</sub>, 75 MHz) of Compound 1g**

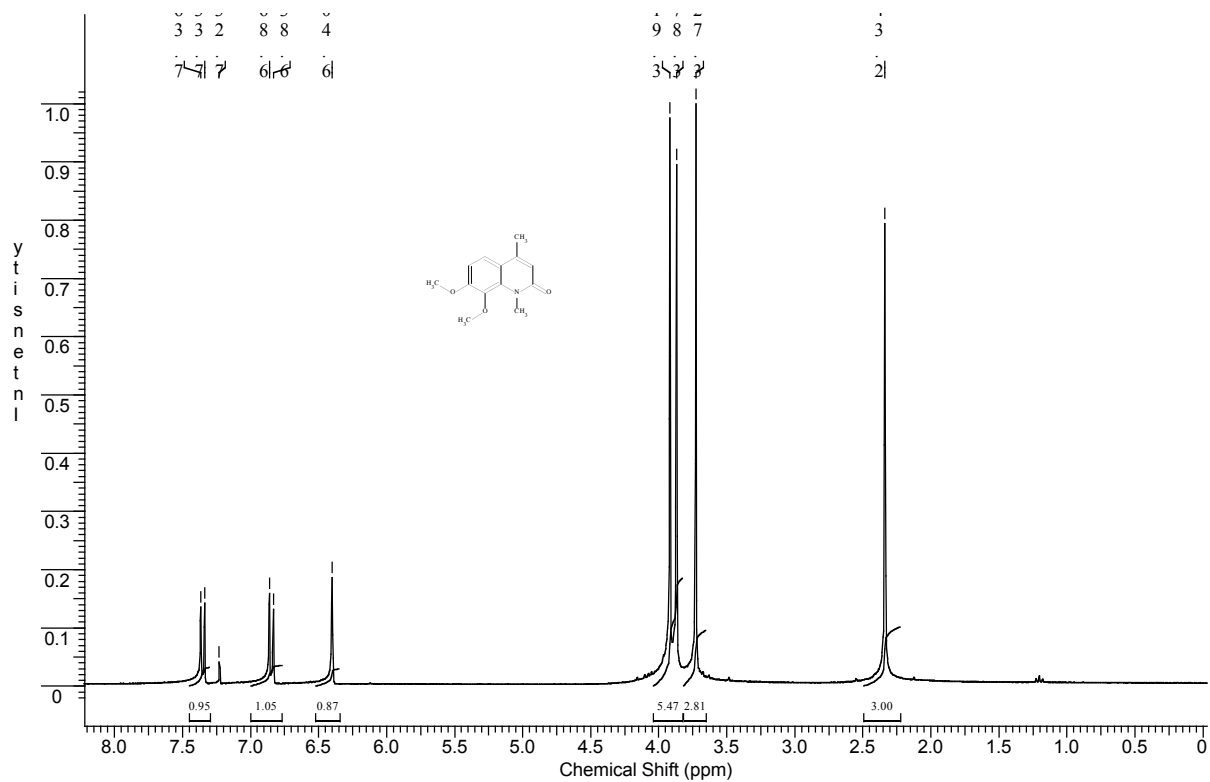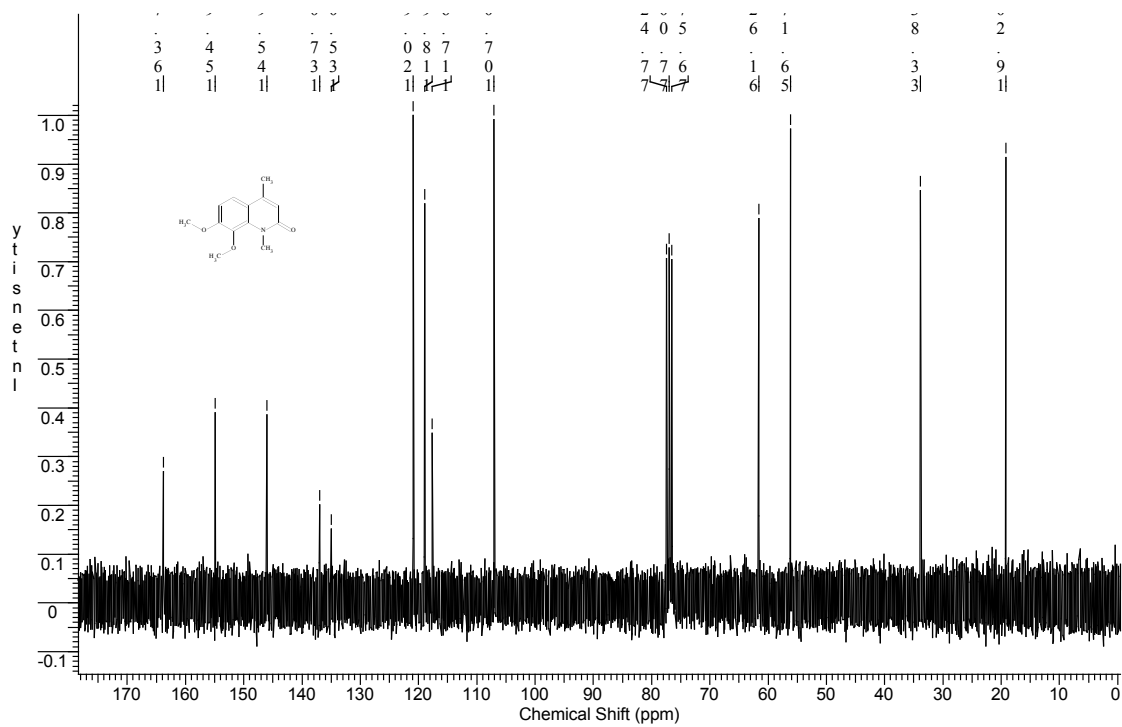

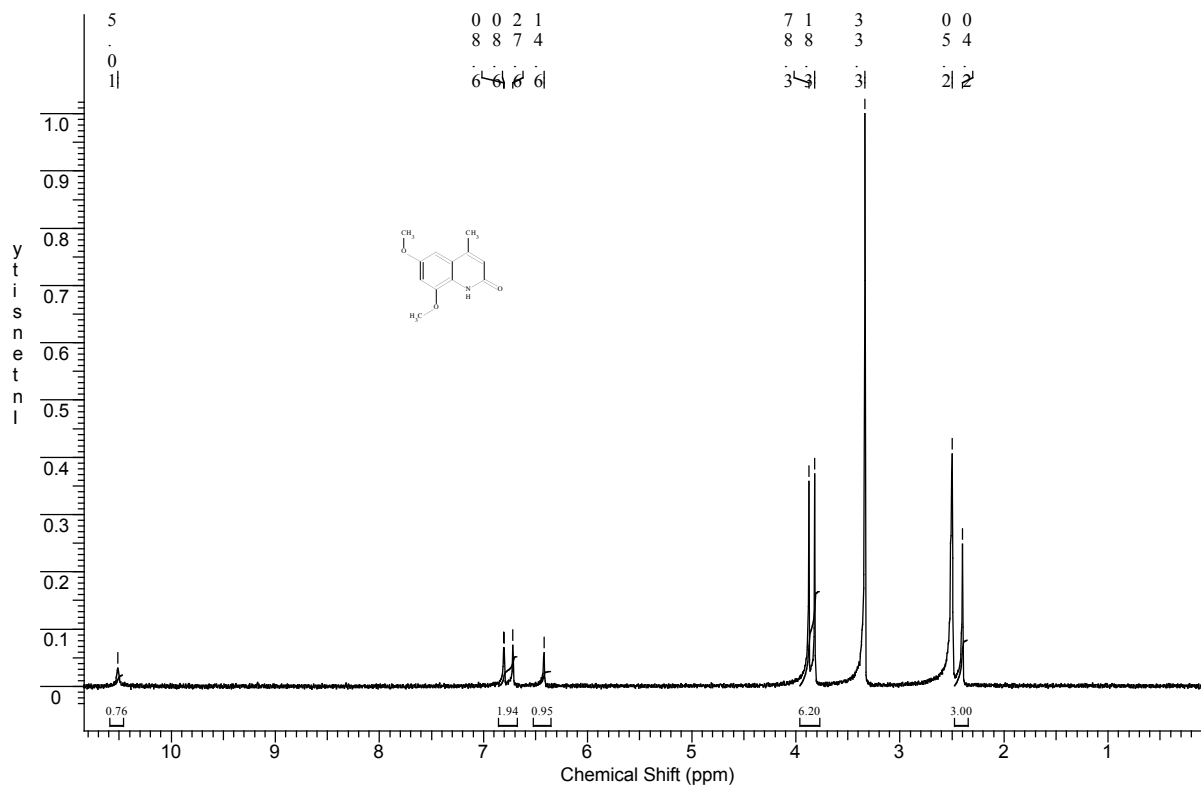

**<sup>1</sup>H NMR (CDCl<sub>3</sub>, 300 MHz) of Compound 1i**

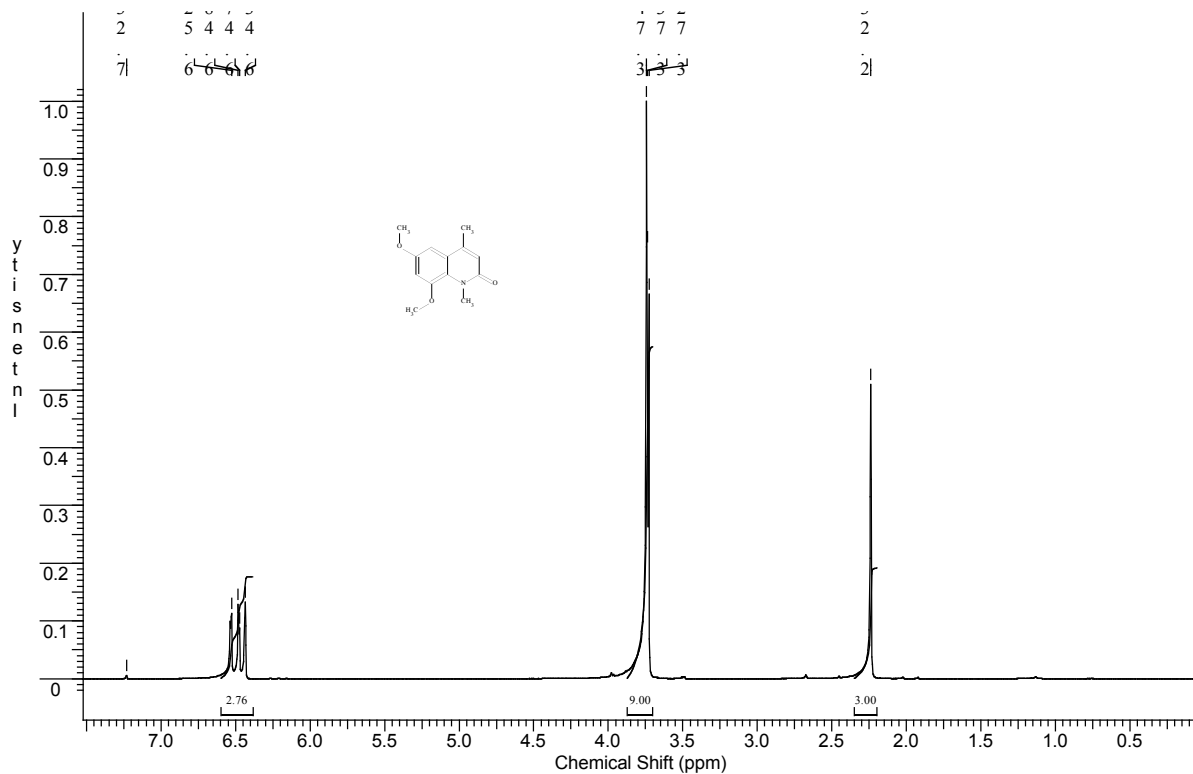

**<sup>1</sup>H NMR (CDCl<sub>3</sub>, 300 MHz) of Compound 1j**

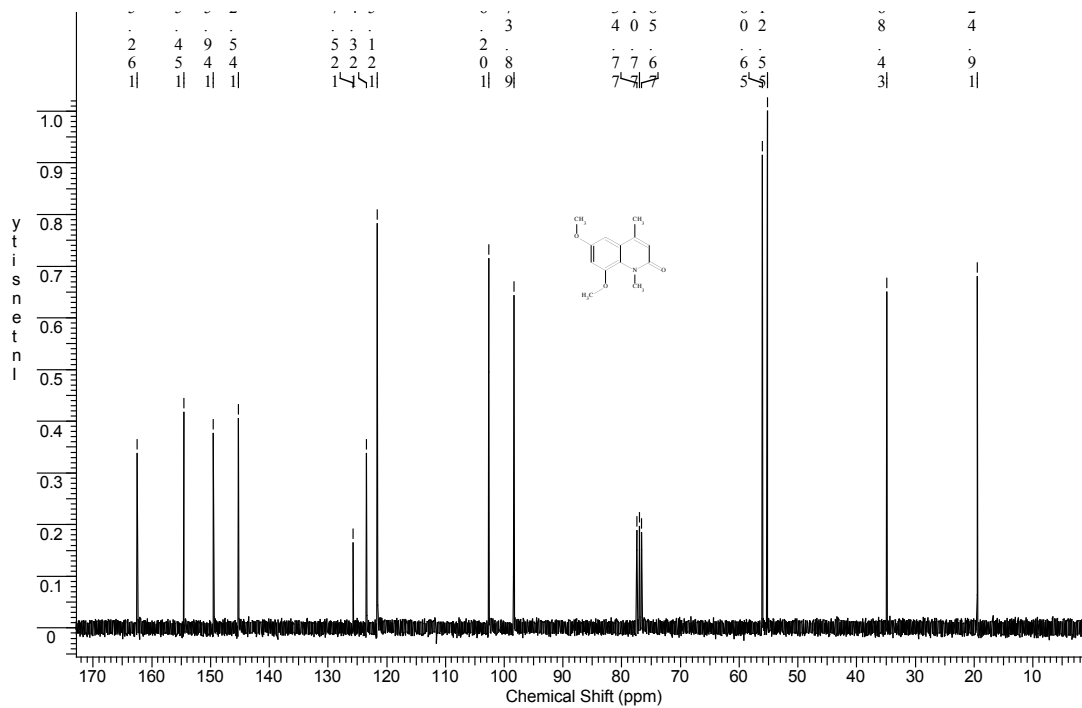

**<sup>13</sup>C NMR (CDCl<sub>3</sub>, 75 MHz) of Compound 1j**

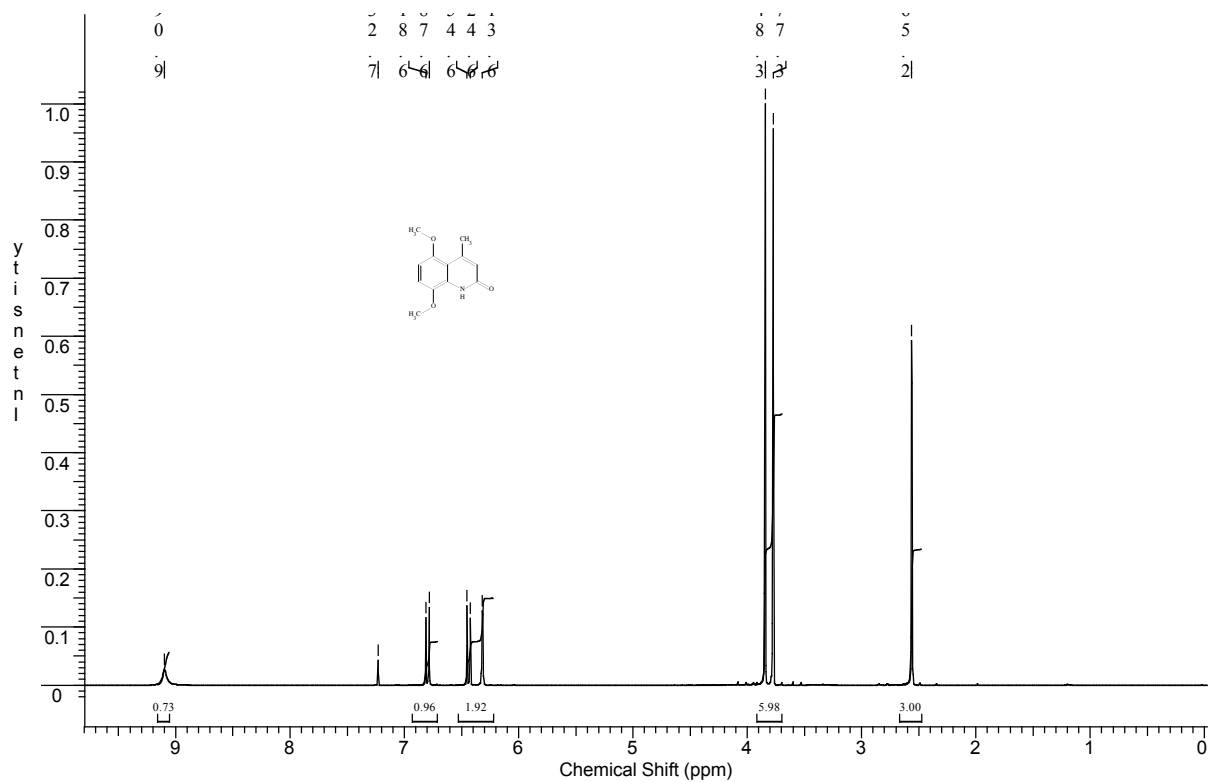

**<sup>1</sup>H NMR (CDCl<sub>3</sub>, 300 MHz) of Compound 1k**

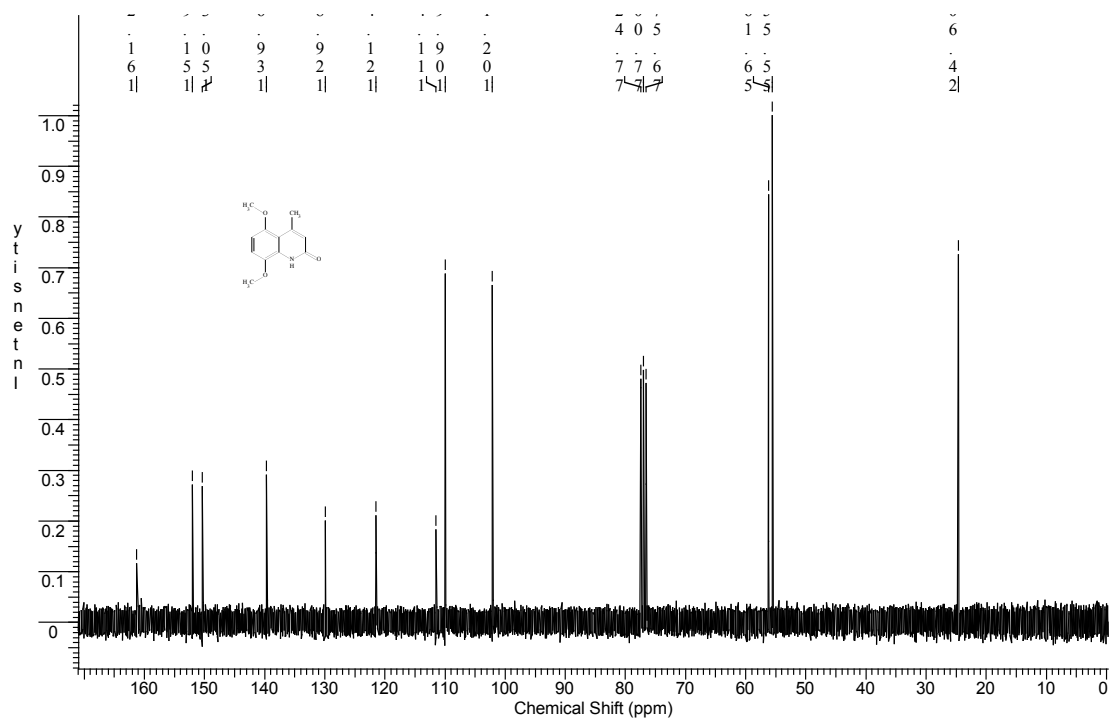

**<sup>13</sup>C NMR (CDCl<sub>3</sub>, 75 MHz) of Compound 1k**

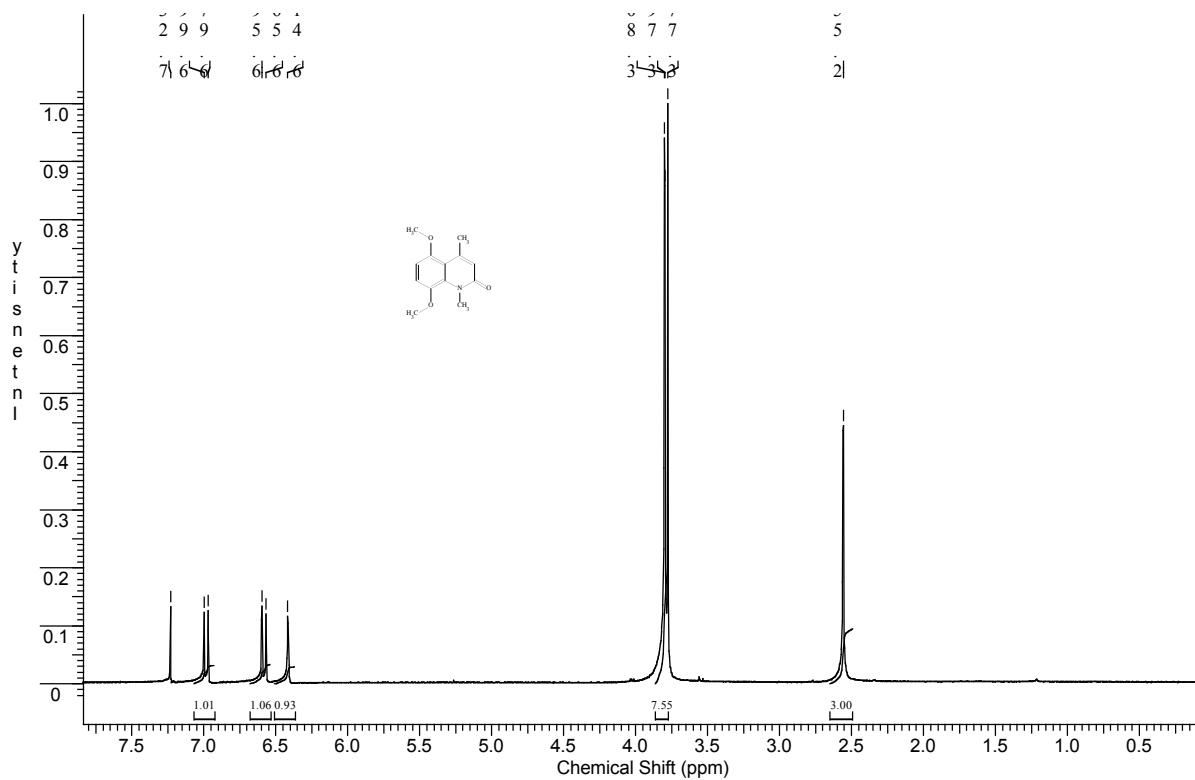

**<sup>1</sup>H NMR (CDCl<sub>3</sub>, 300 MHz) of Compound 11**

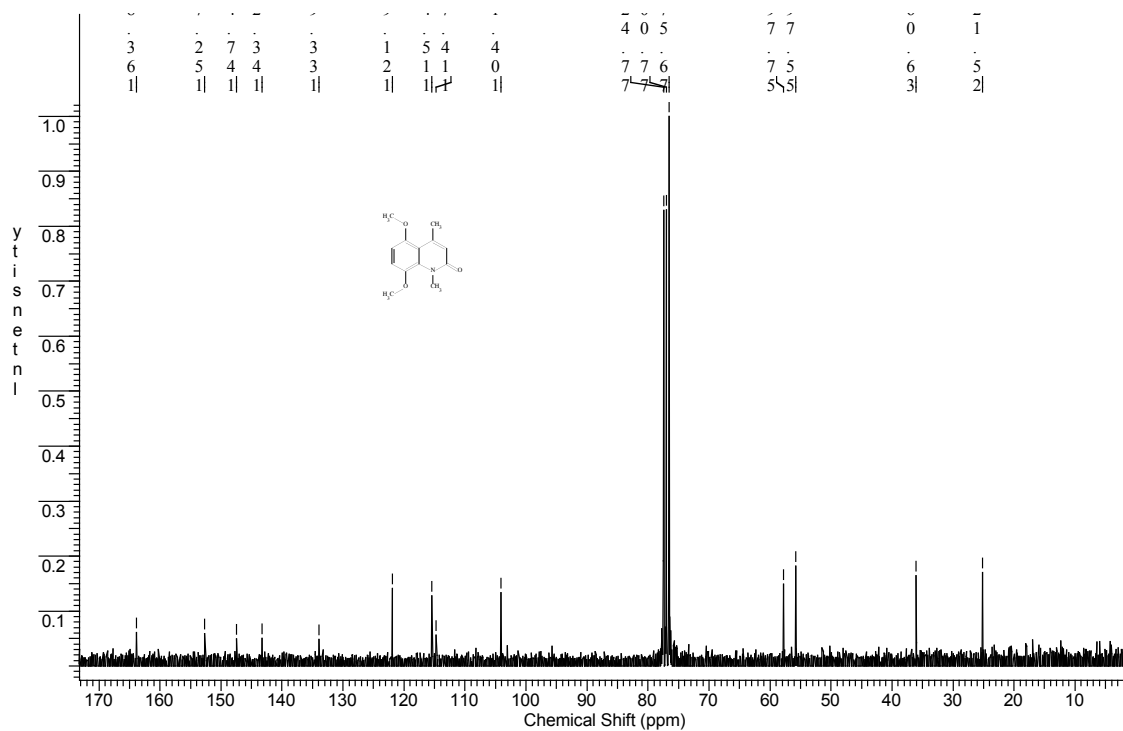

**<sup>13</sup>C NMR (CDCl<sub>3</sub>, 75 MHz) of Compound 11**

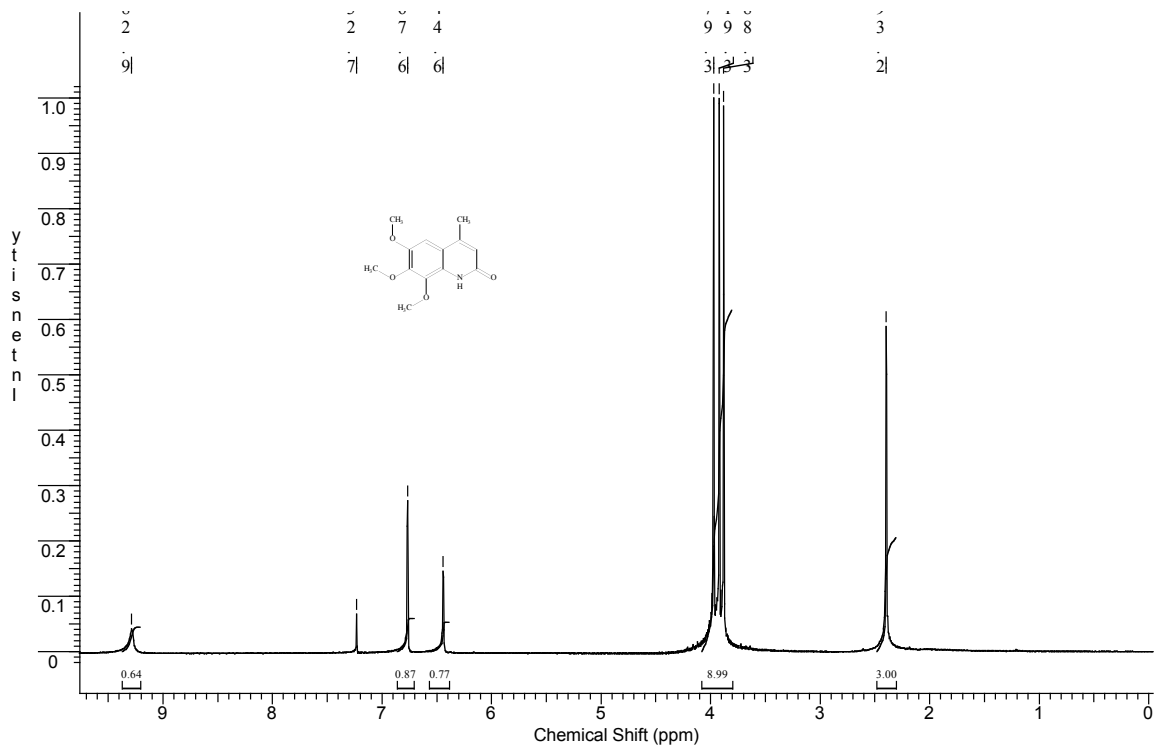

**<sup>1</sup>H NMR (CDCl<sub>3</sub>, 300 MHz) of Compound 1m**

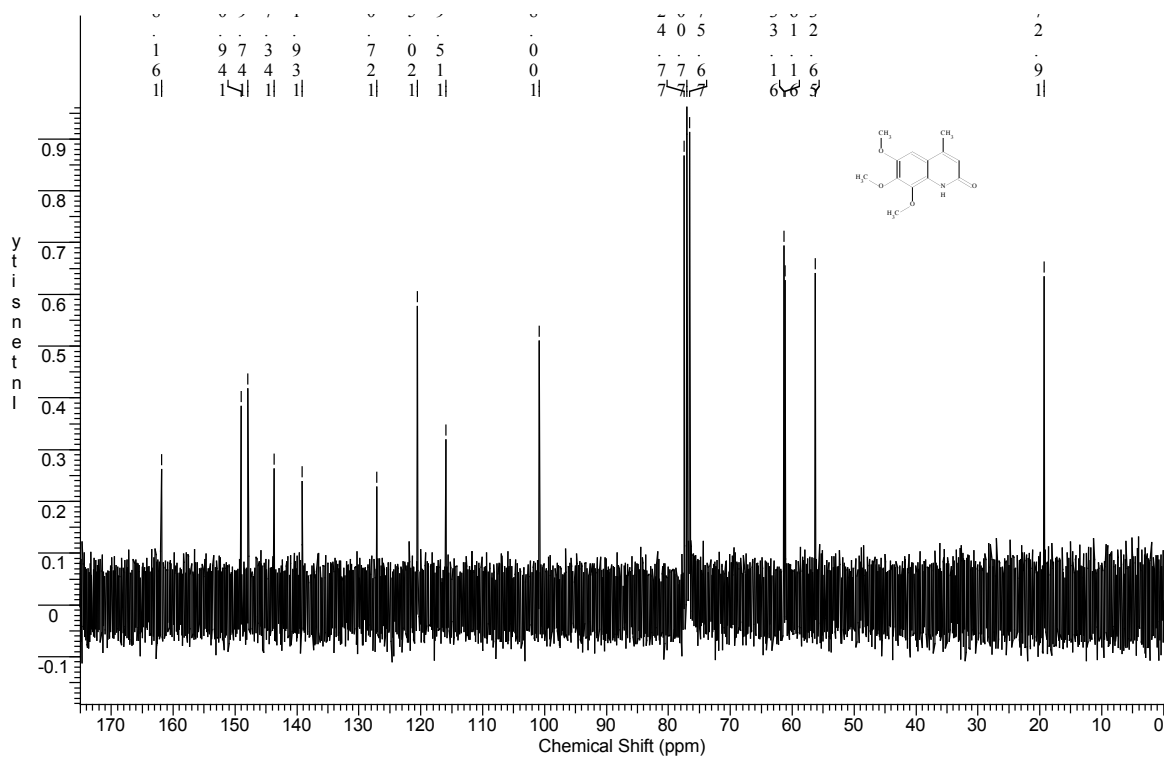

**<sup>13</sup>C NMR (CDCl<sub>3</sub>, 75 MHz) of Compound 1m**



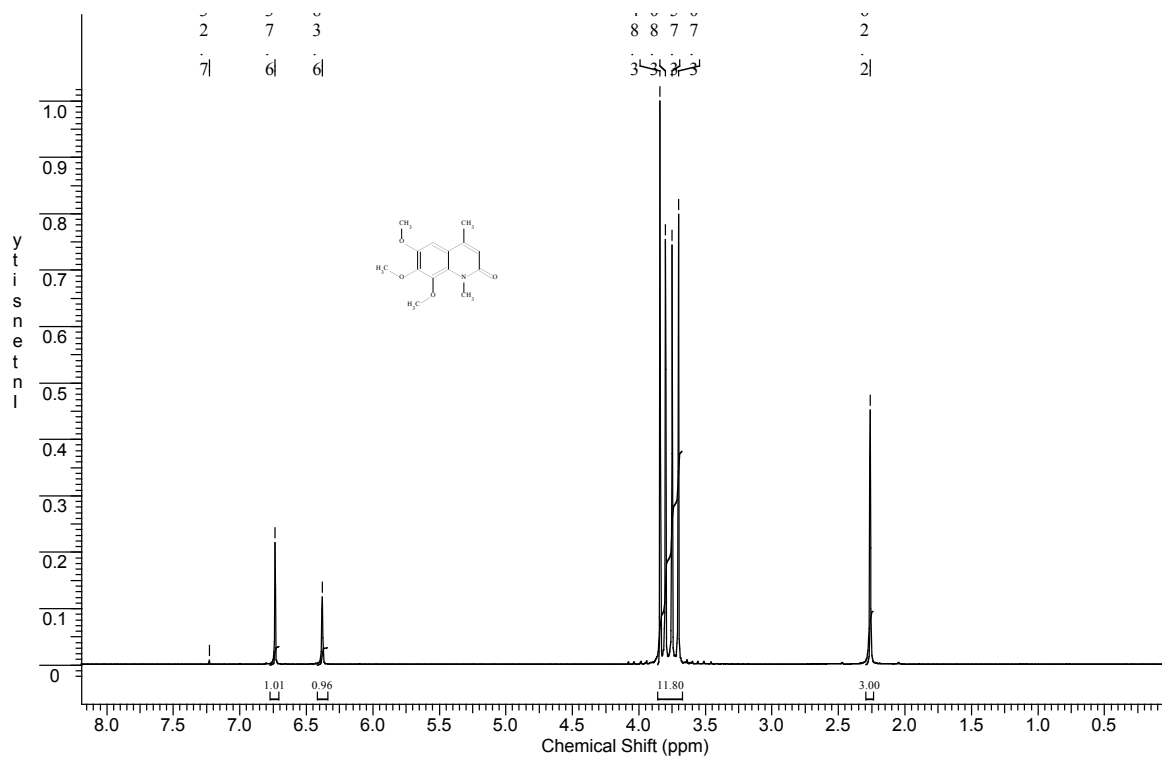

**<sup>1</sup>H NMR (CDCl<sub>3</sub>, 300 MHz) of Compound 1n**

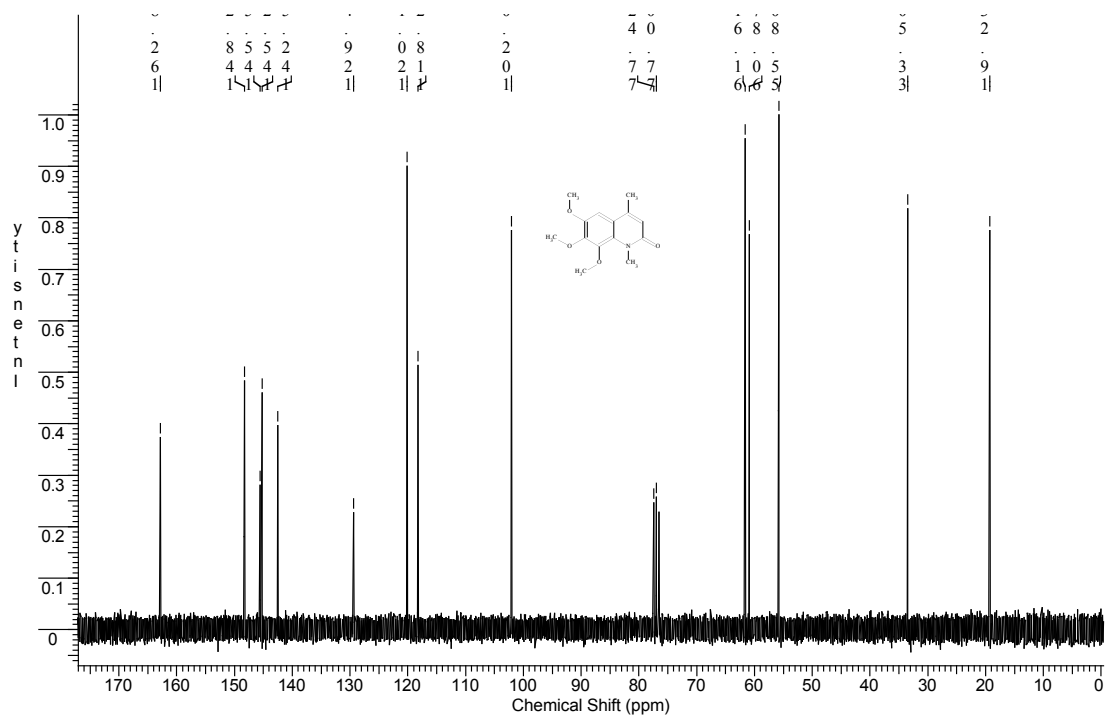

**<sup>13</sup>C NMR (CDCl<sub>3</sub>, 75 MHz) of Compound 1n**

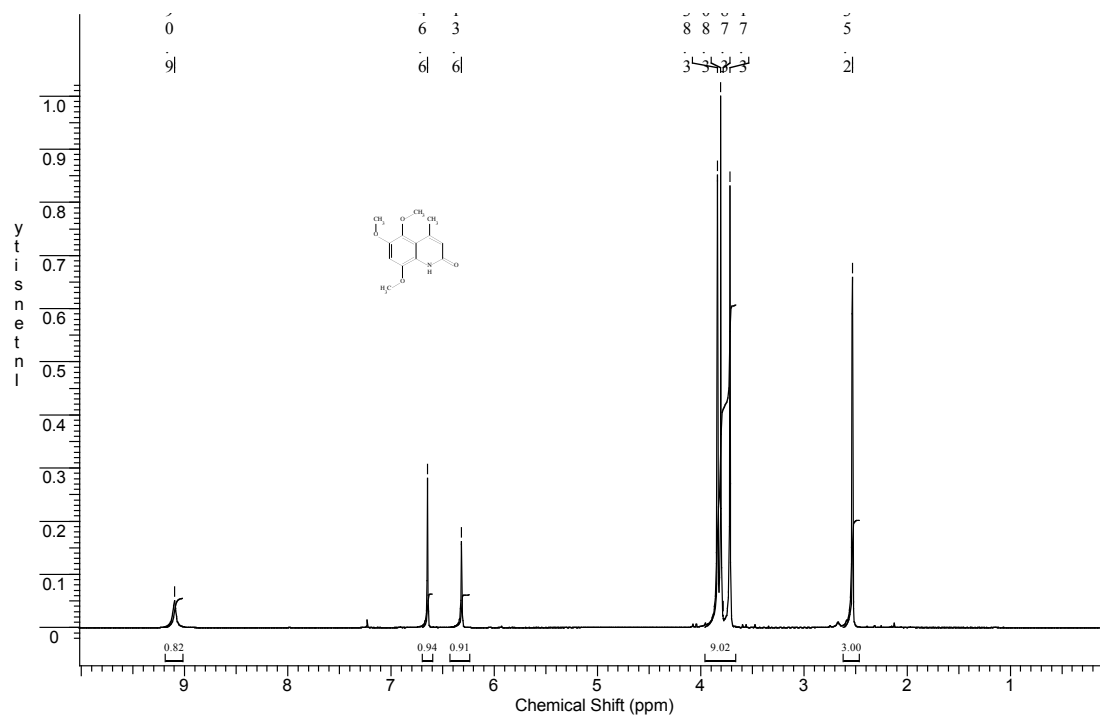

**<sup>1</sup>H NMR (CDCl<sub>3</sub>, 300 MHz) of Compound 1o**

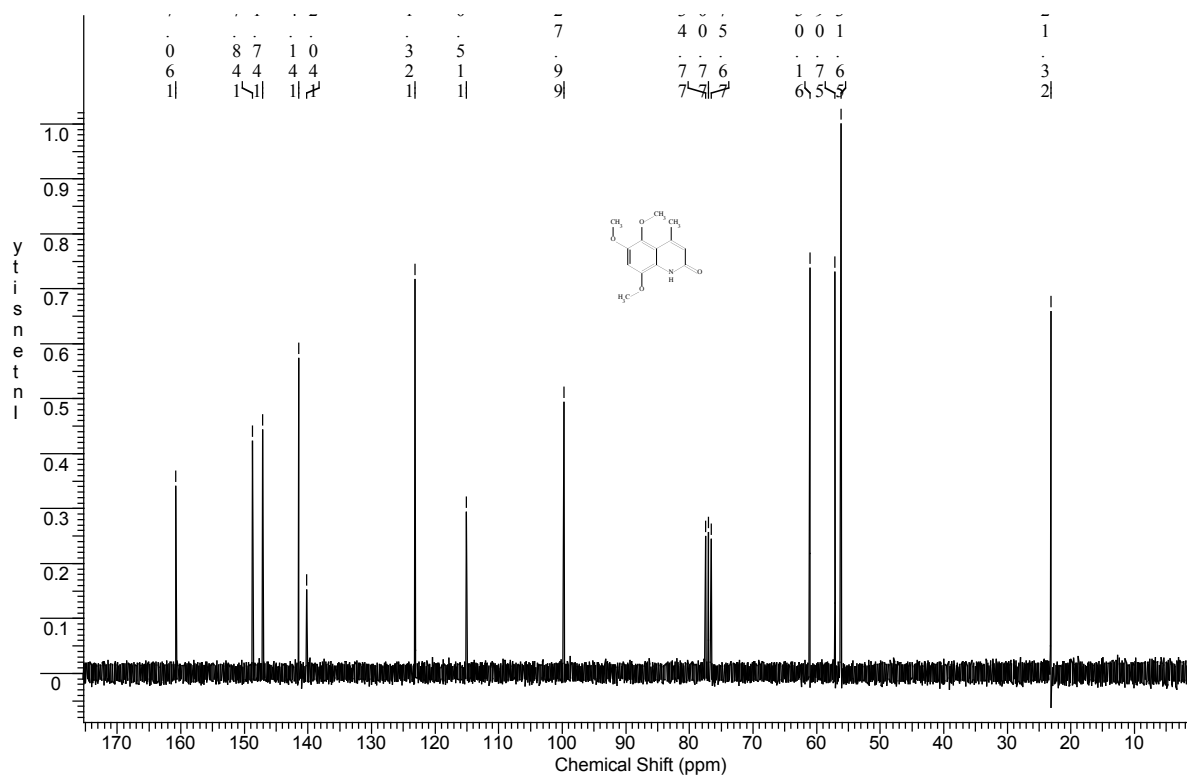

**<sup>13</sup>C NMR (CDCl<sub>3</sub>, 75 MHz) of Compound 1o**

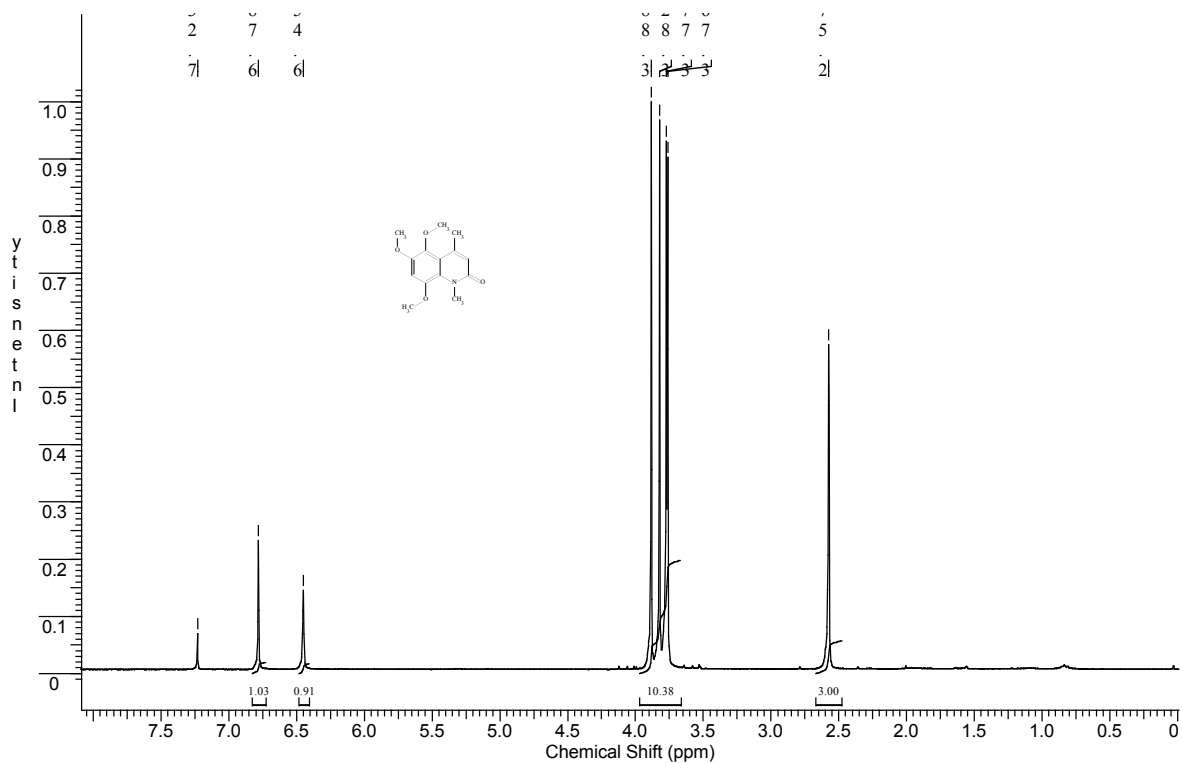

**<sup>1</sup>H NMR (CDCl<sub>3</sub>, 300 MHz) of Compound 1p**

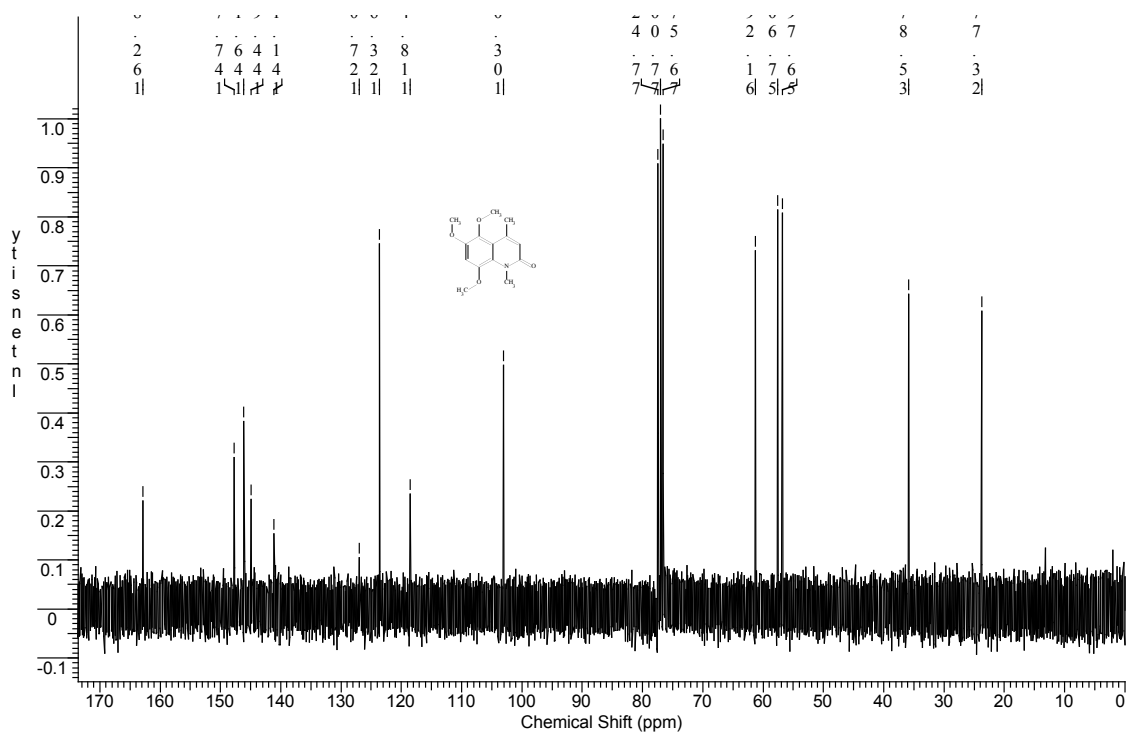

**<sup>13</sup>C NMR (CDCl<sub>3</sub>, 75 MHz) of Compound 1p**

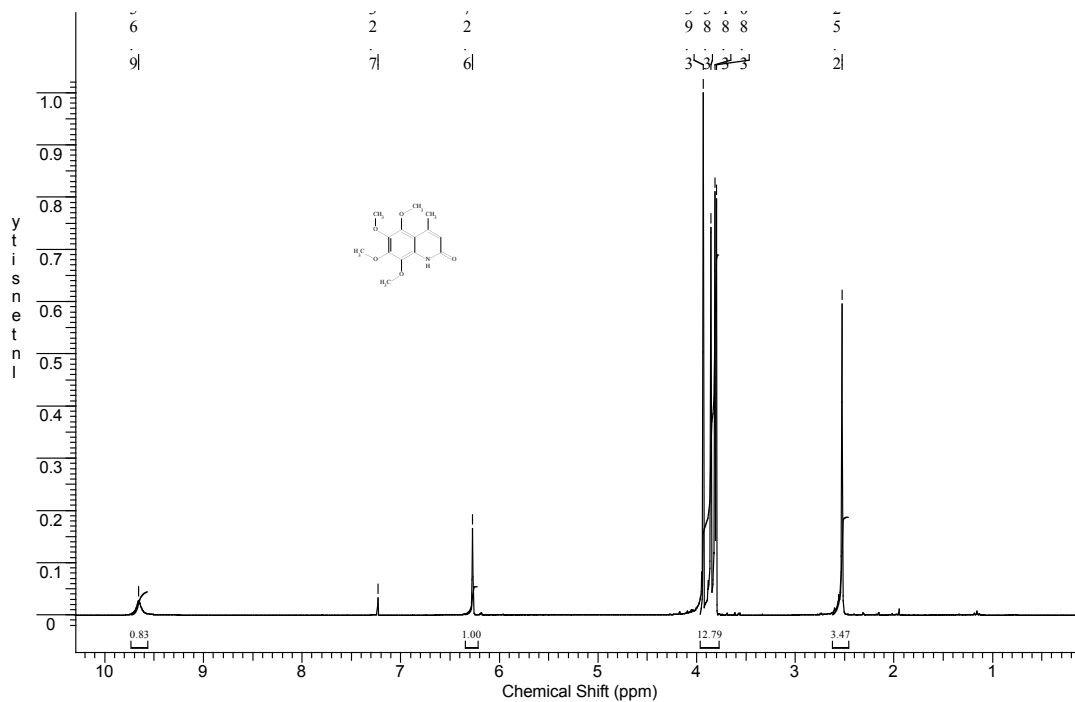

**<sup>1</sup>H NMR (CDCl<sub>3</sub>, 300 MHz) of Compound 1q**

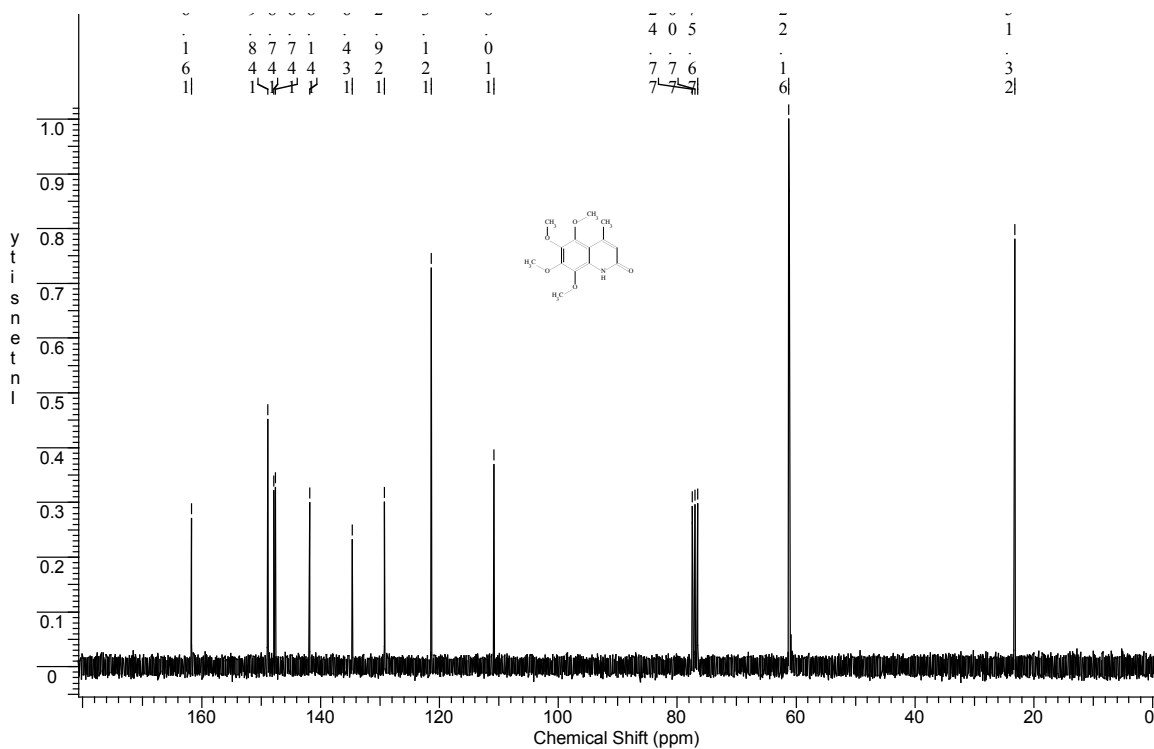

**<sup>13</sup>C NMR (CDCl<sub>3</sub>, 75 MHz) of Compound 1q**

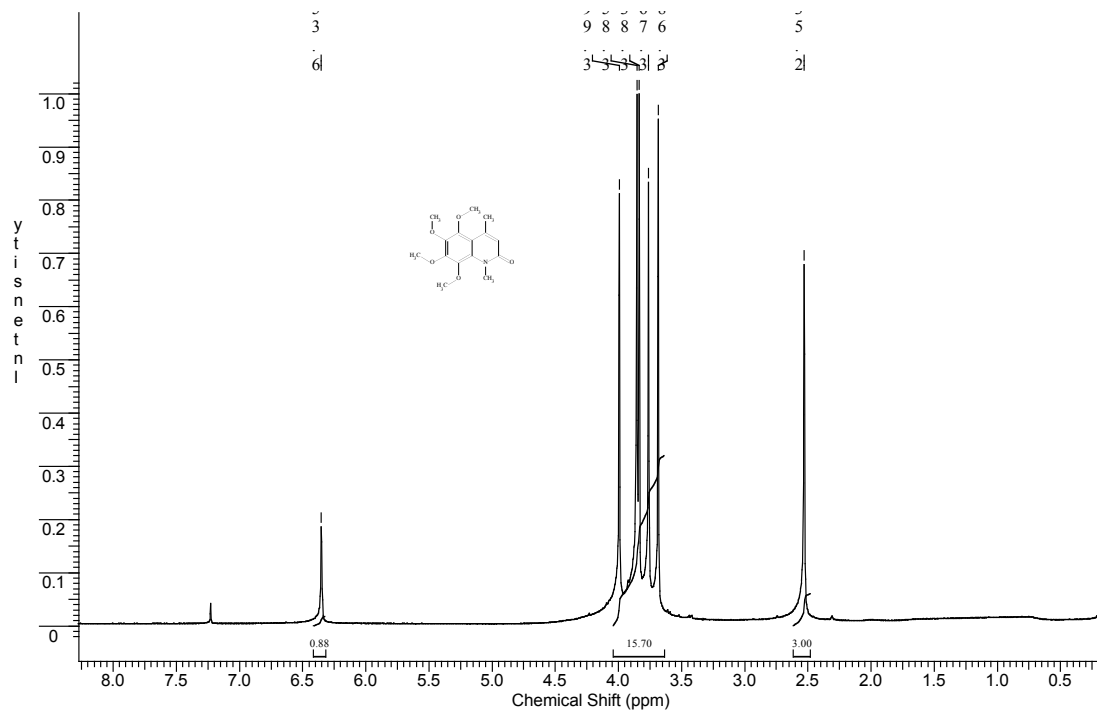

**<sup>1</sup>H NMR (CDCl<sub>3</sub>, 300 MHz) of Compound 1r**

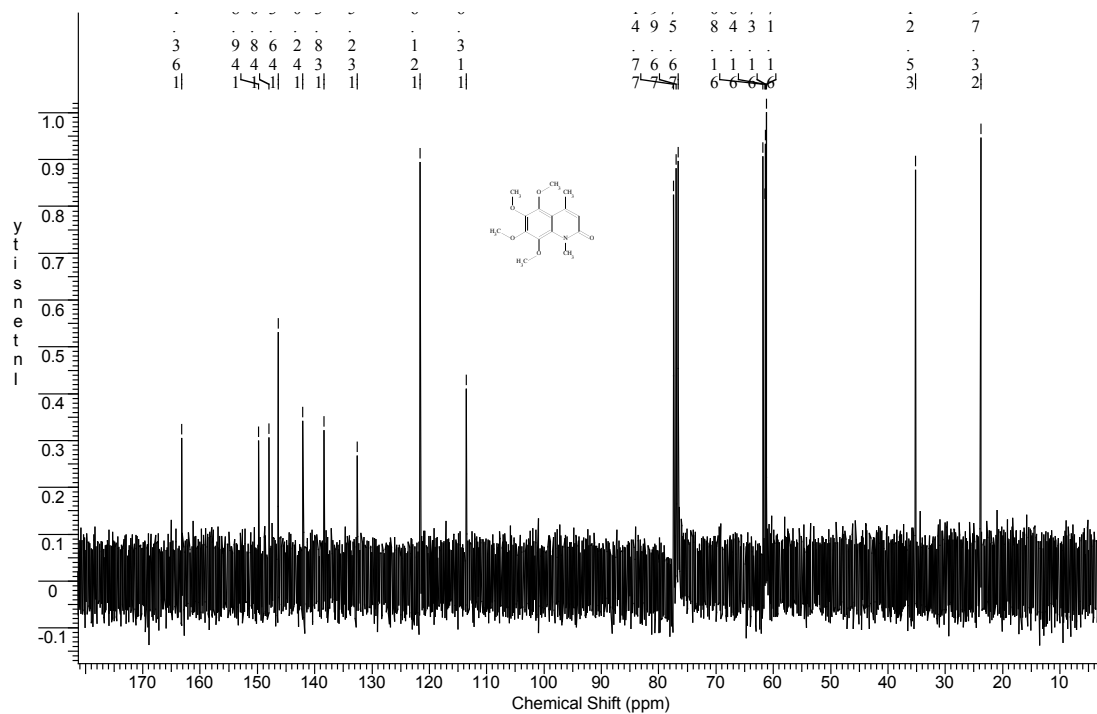

**<sup>13</sup>C NMR (CDCl<sub>3</sub>, 75 MHz) of Compound 1r**



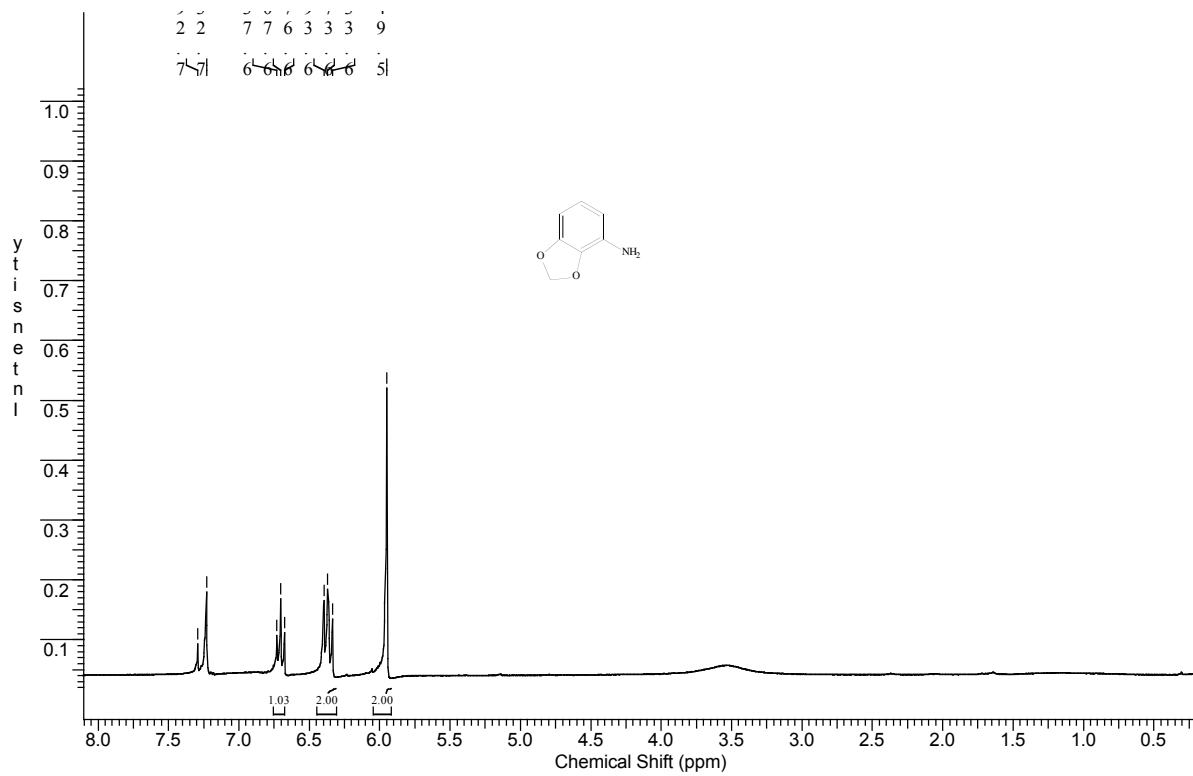

**$^1\text{H}$  NMR ( $\text{CDCl}_3$ , 300 MHz) of Compound 3a**

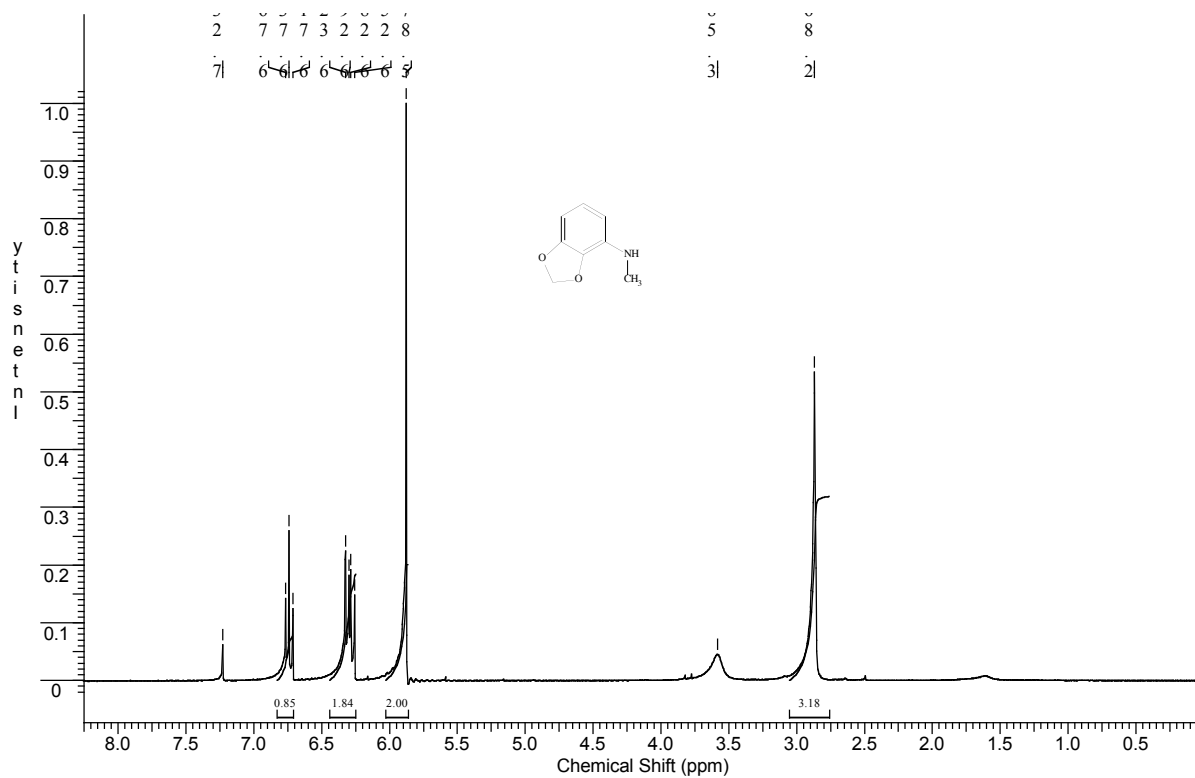

**<sup>1</sup>H NMR (CDCl<sub>3</sub>, 300 MHz) of Compound 3b**

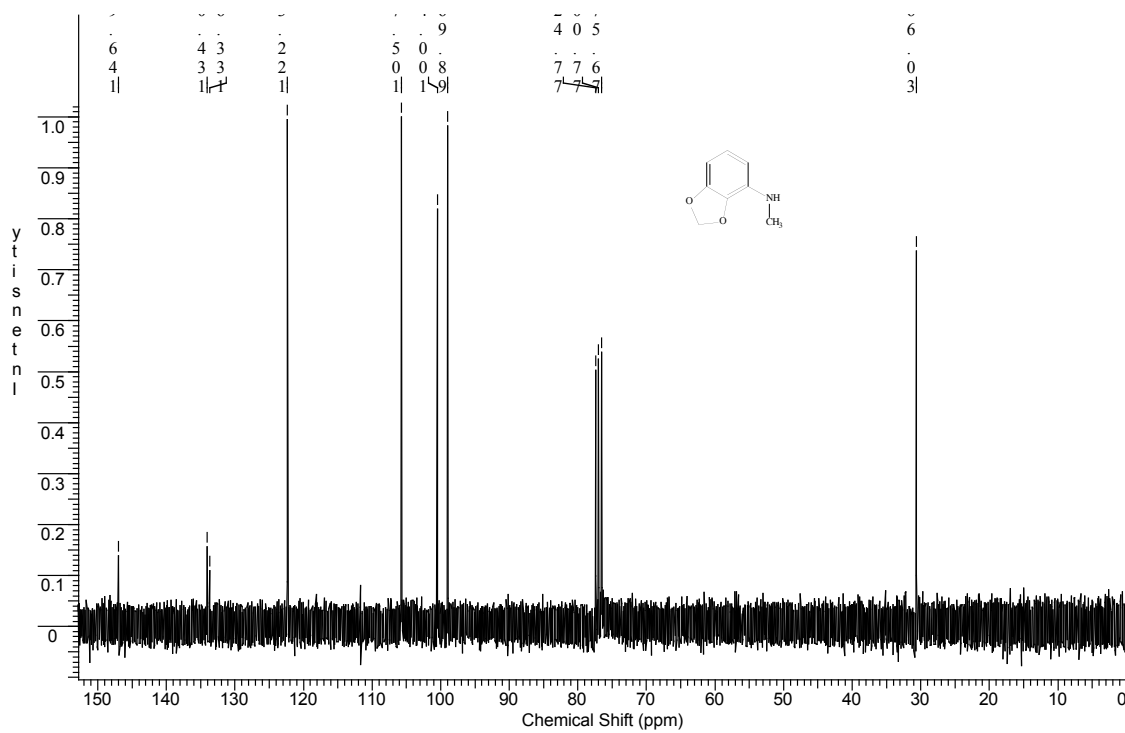

**<sup>13</sup>C NMR (CDCl<sub>3</sub>, 75 MHz) of Compound 3b**



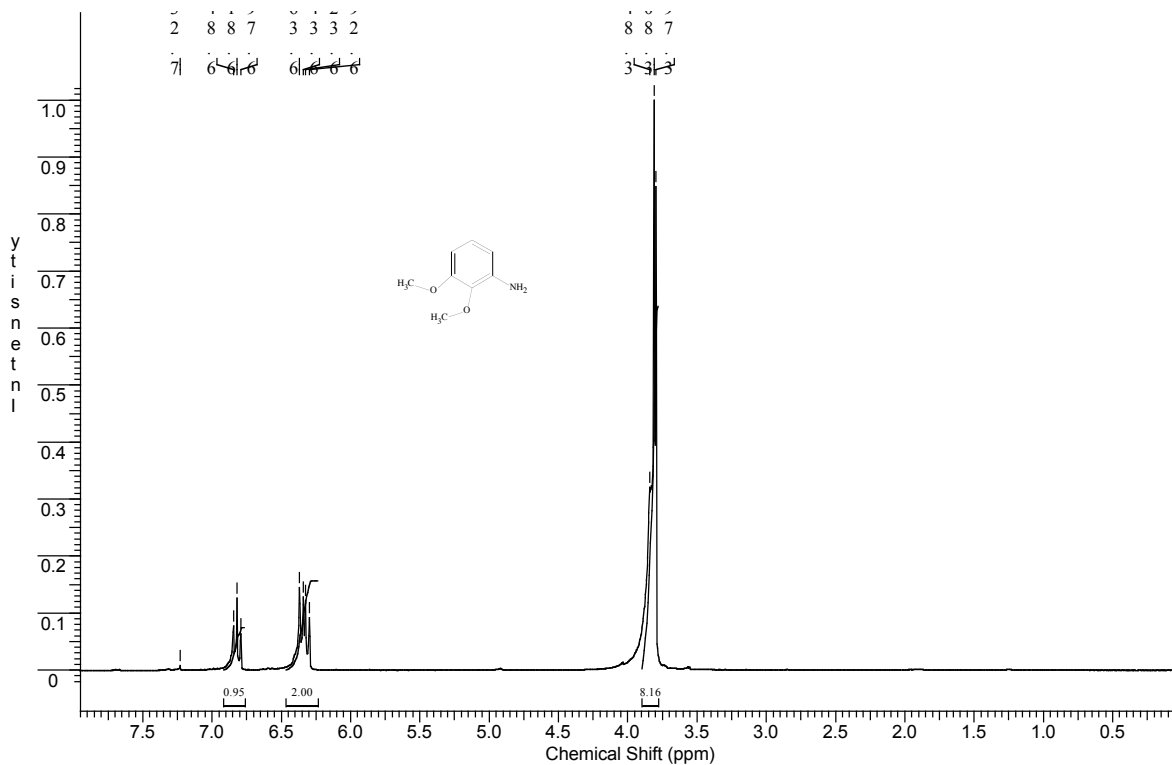

**<sup>1</sup>H NMR (CDCl<sub>3</sub>, 300 MHz) of Compound 3g**

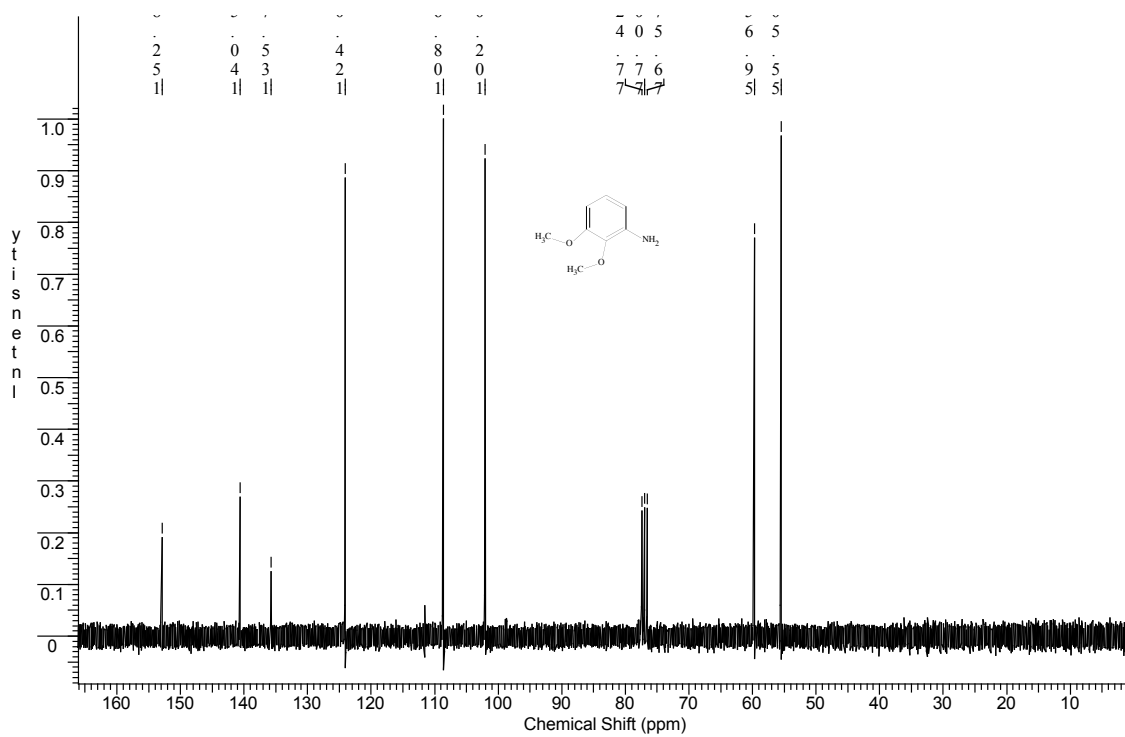

**<sup>13</sup>C NMR (CDCl<sub>3</sub>, 75 MHz) of Compound 3g**

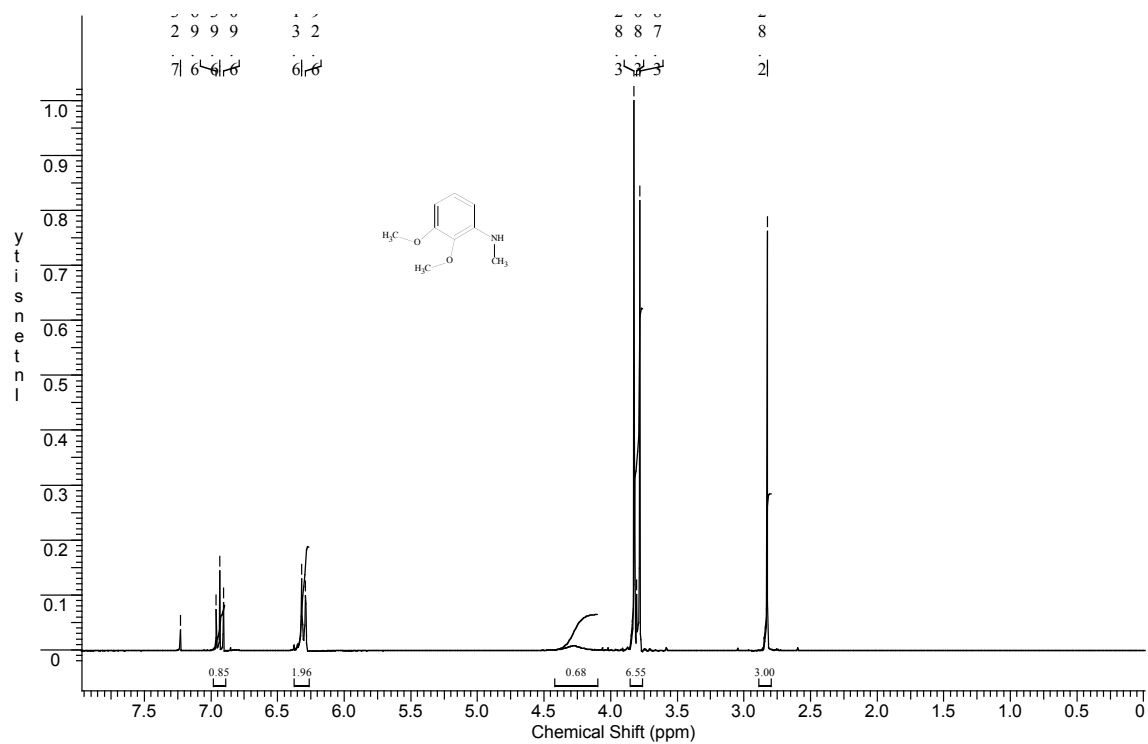

**<sup>1</sup>H NMR (CDCl<sub>3</sub>, 300 MHz) of Compound 3h**

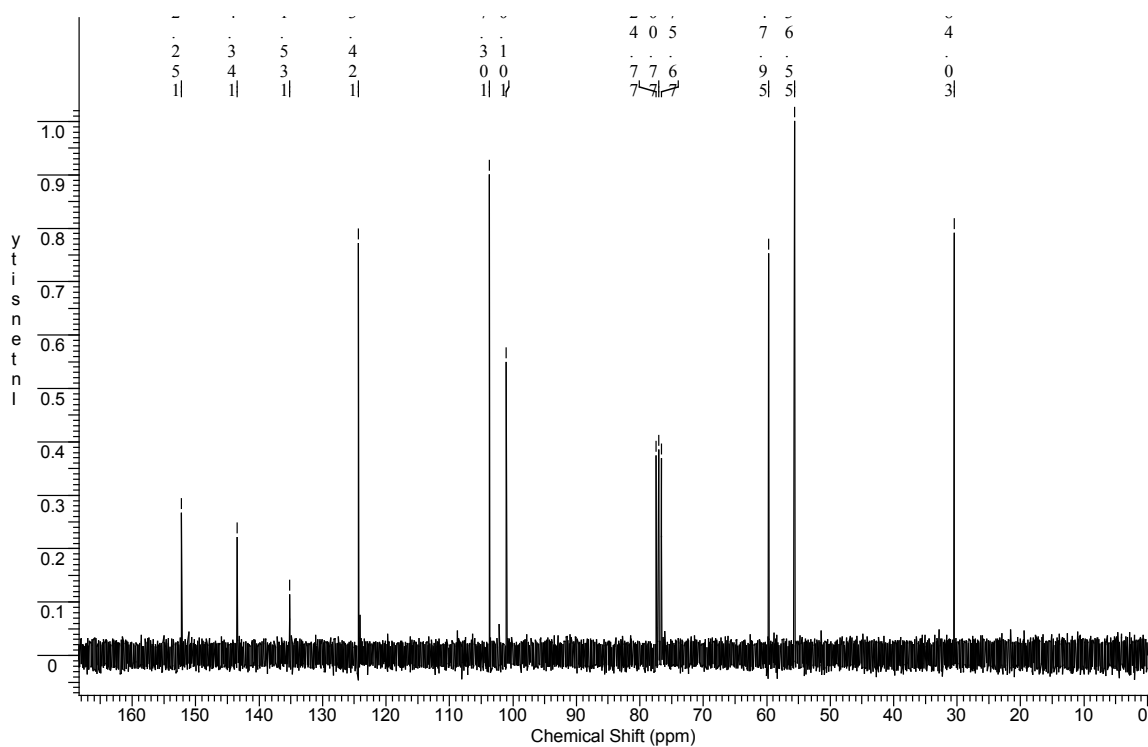

**<sup>13</sup>C NMR (CDCl<sub>3</sub>, 75 MHz) of Compound 3h**

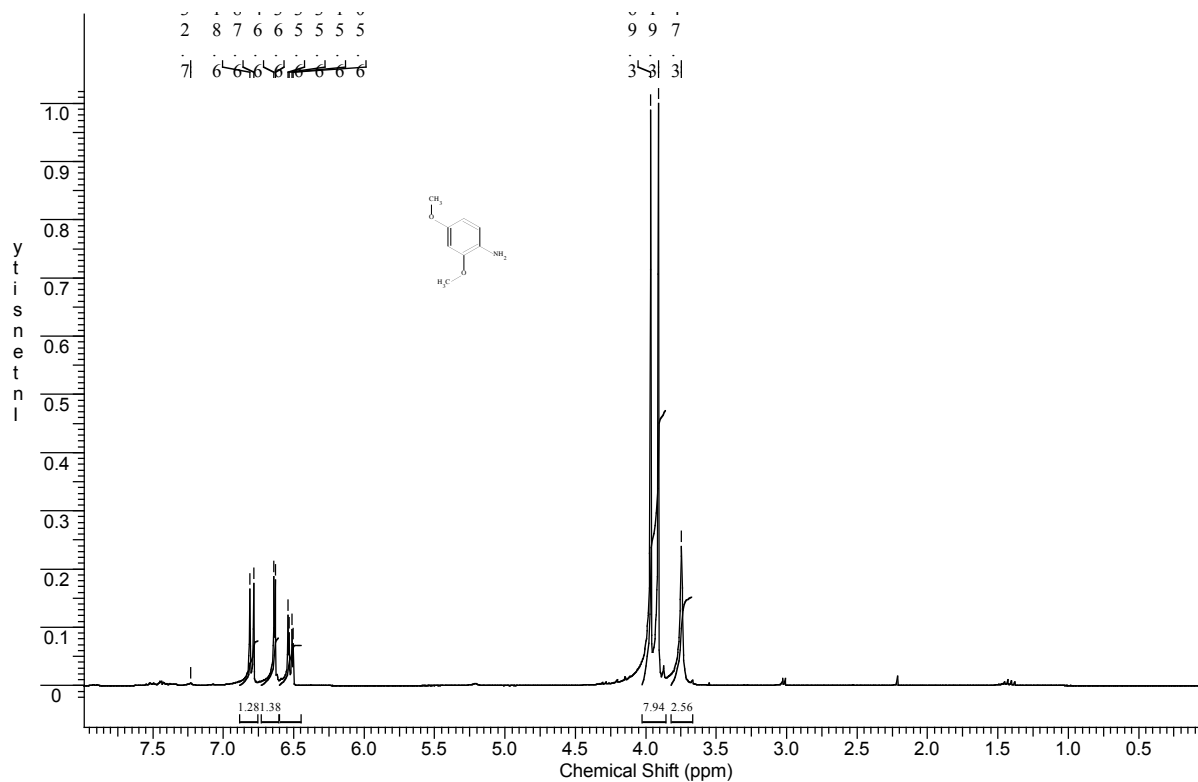

**<sup>1</sup>H NMR (CDCl<sub>3</sub>, 300 MHz) of Compound 3i**

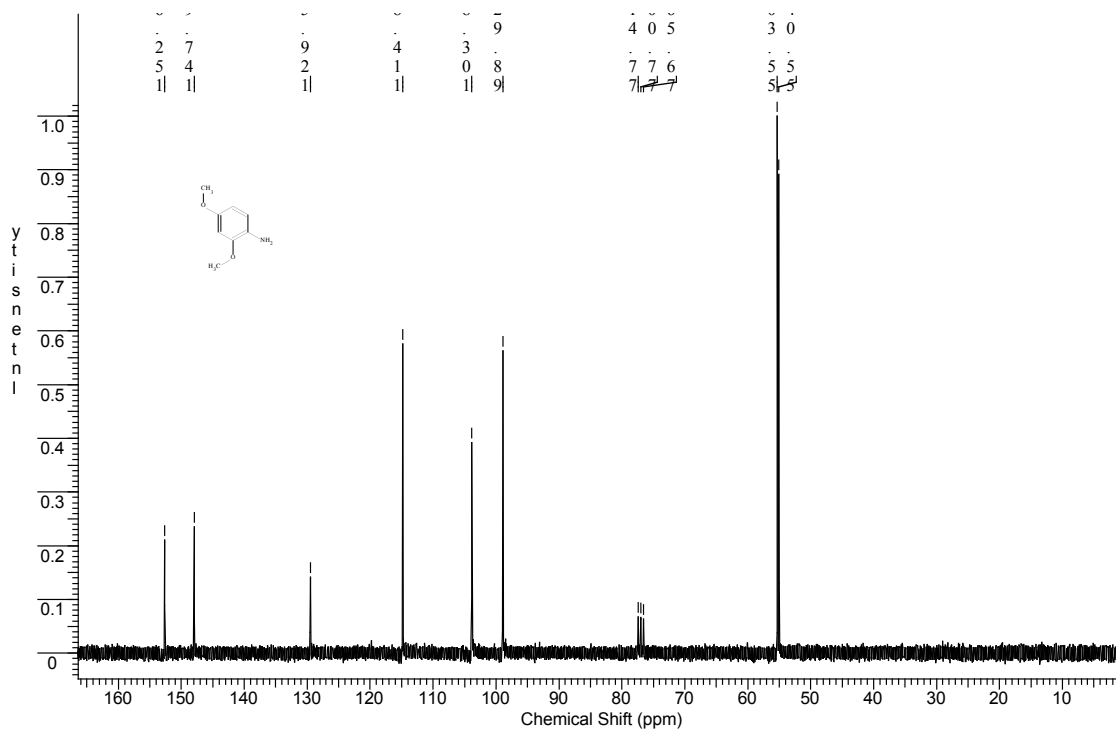

**<sup>13</sup>C NMR (CDCl<sub>3</sub>, 75 MHz) of Compound 3i**

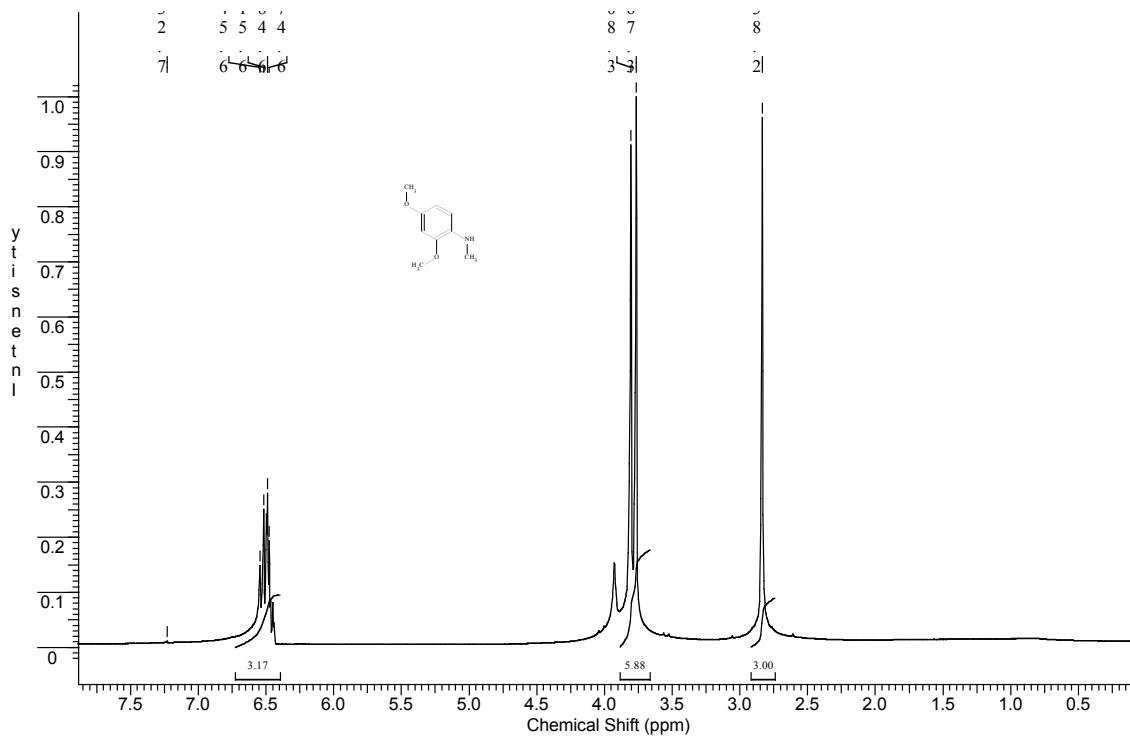

**<sup>1</sup>H NMR (CDCl<sub>3</sub>, 300 MHz) of Compound 3j**

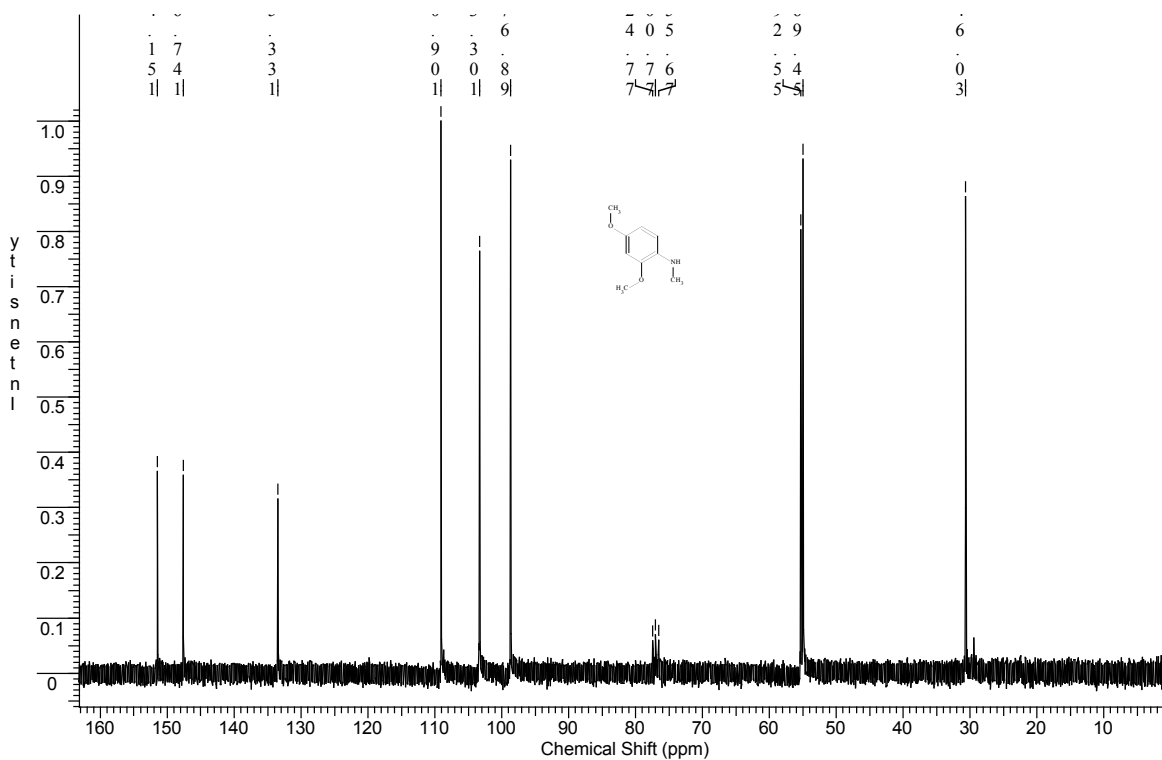

**<sup>13</sup>C NMR (CDCl<sub>3</sub>, 75 MHz) of Compound 3j**

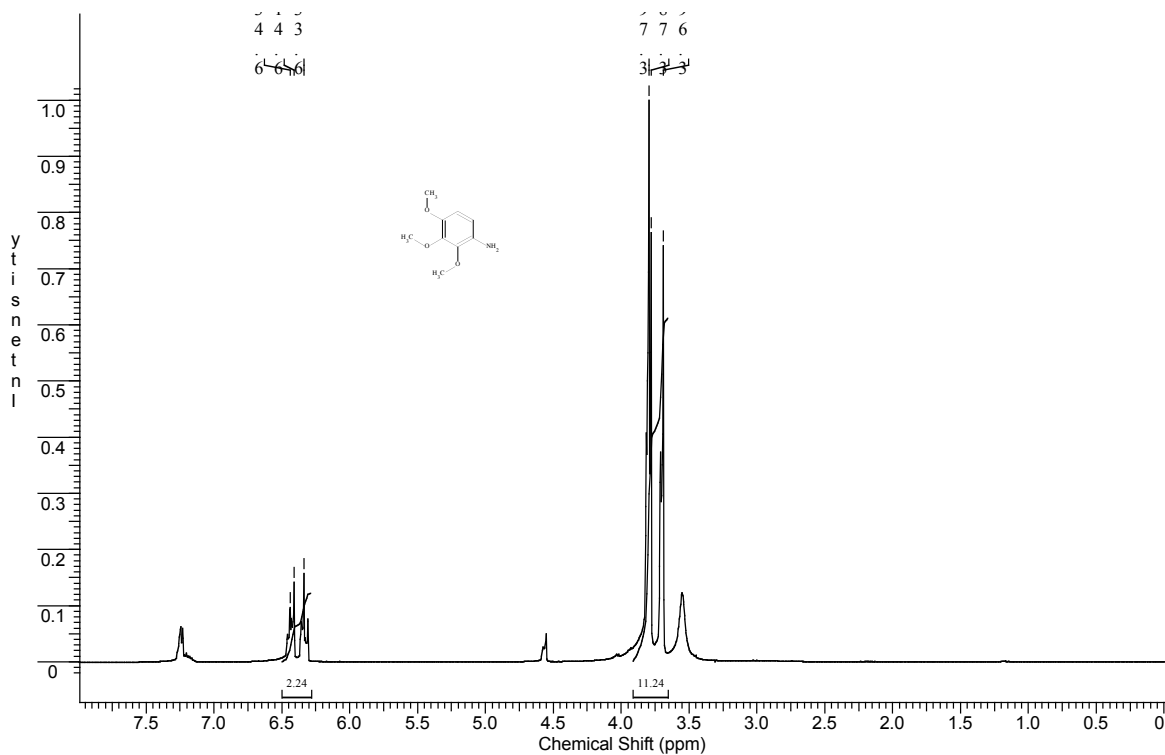

**<sup>1</sup>H NMR (CDCl<sub>3</sub>, 300 MHz) of Compound 3m**

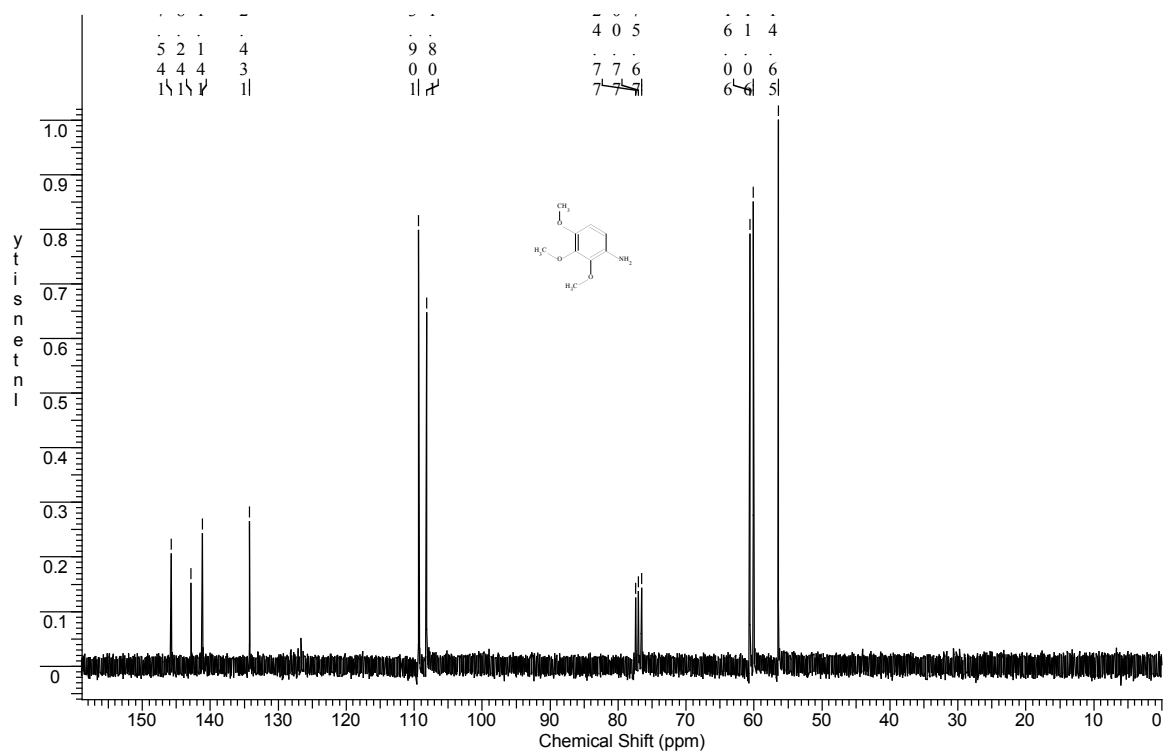

**<sup>13</sup>C NMR (CDCl<sub>3</sub>, 75 MHz) of Compound 3m**

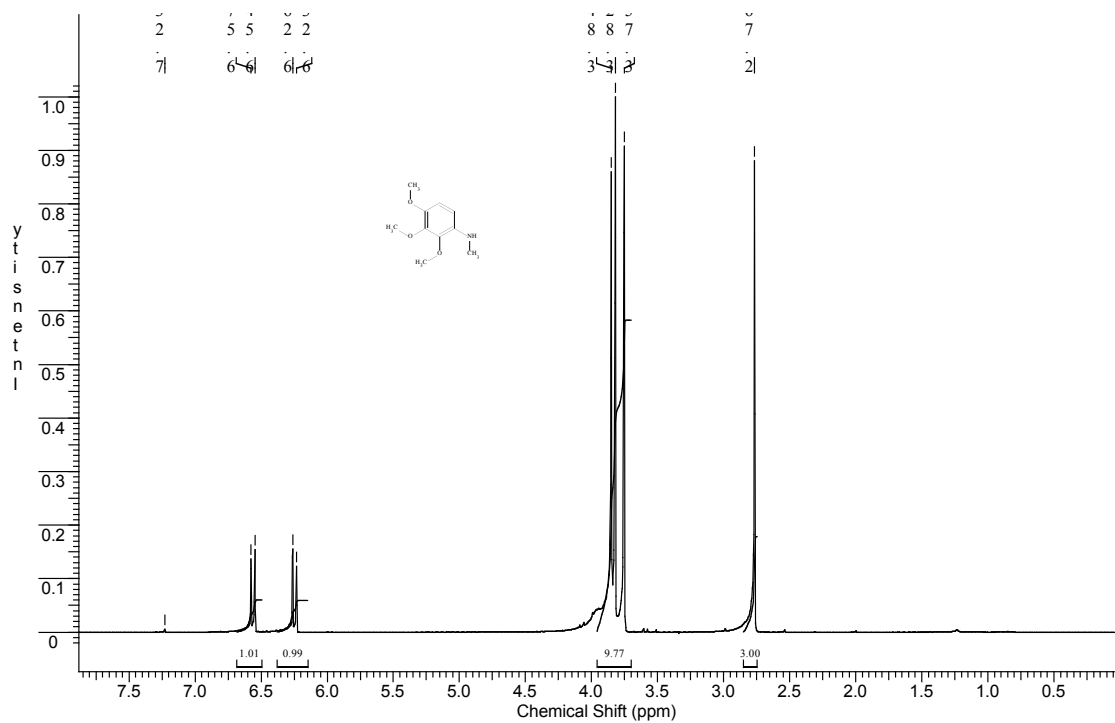

**<sup>1</sup>H NMR (CDCl<sub>3</sub>, 300 MHz) of Compound 3n**

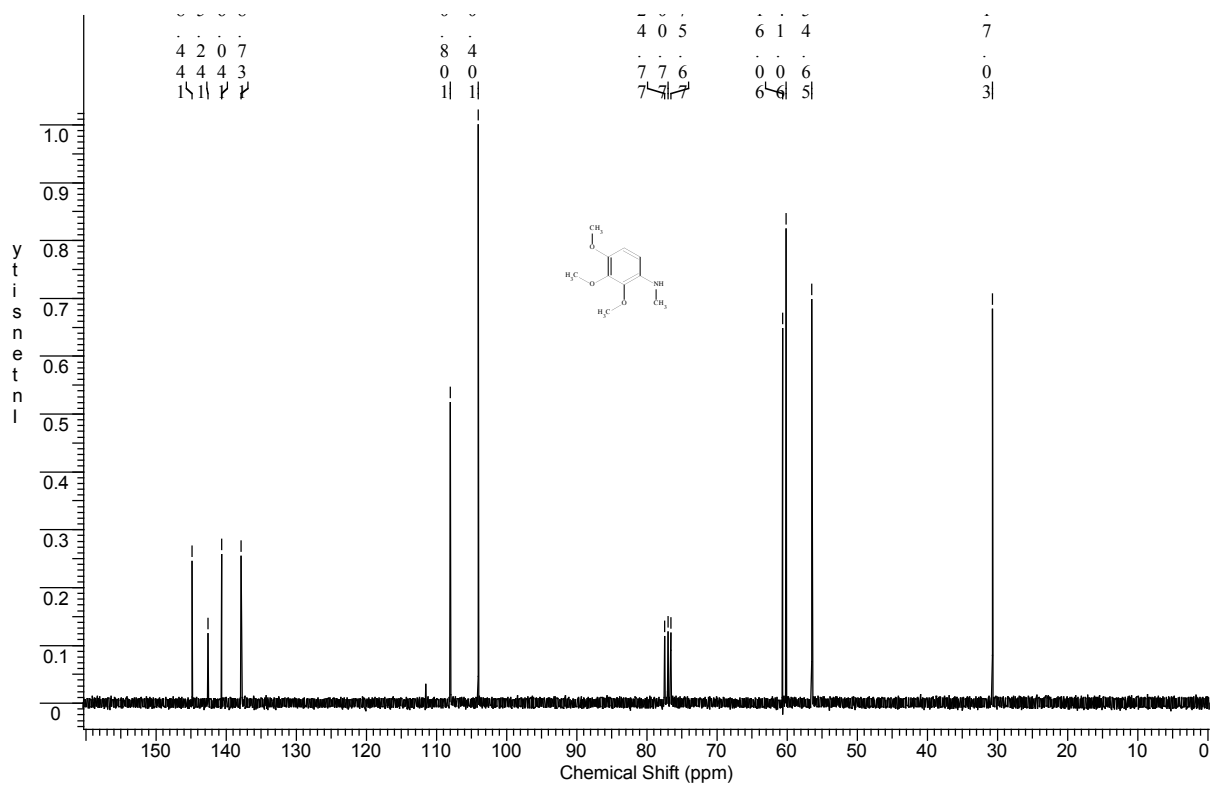

**<sup>13</sup>C NMR (CDCl<sub>3</sub>, 75 MHz) of Compound 3n**

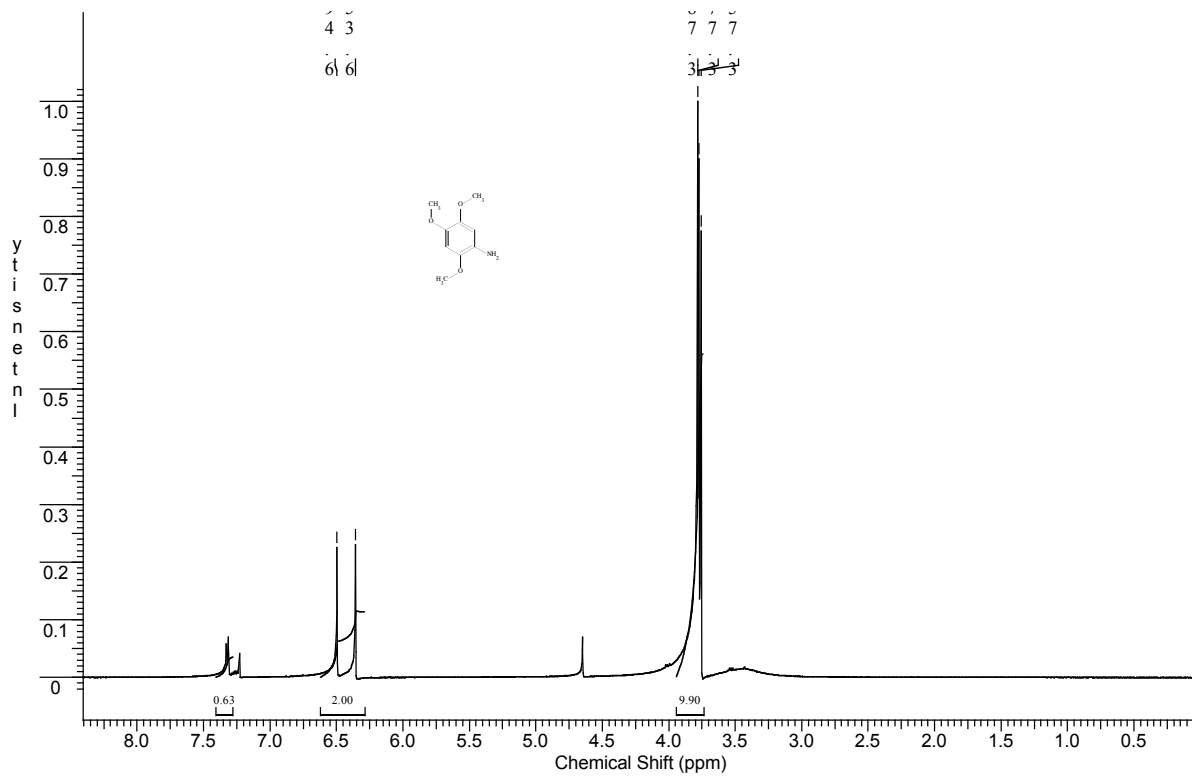

**<sup>1</sup>H NMR (CDCl<sub>3</sub>, 300 MHz) of Compound 3o**

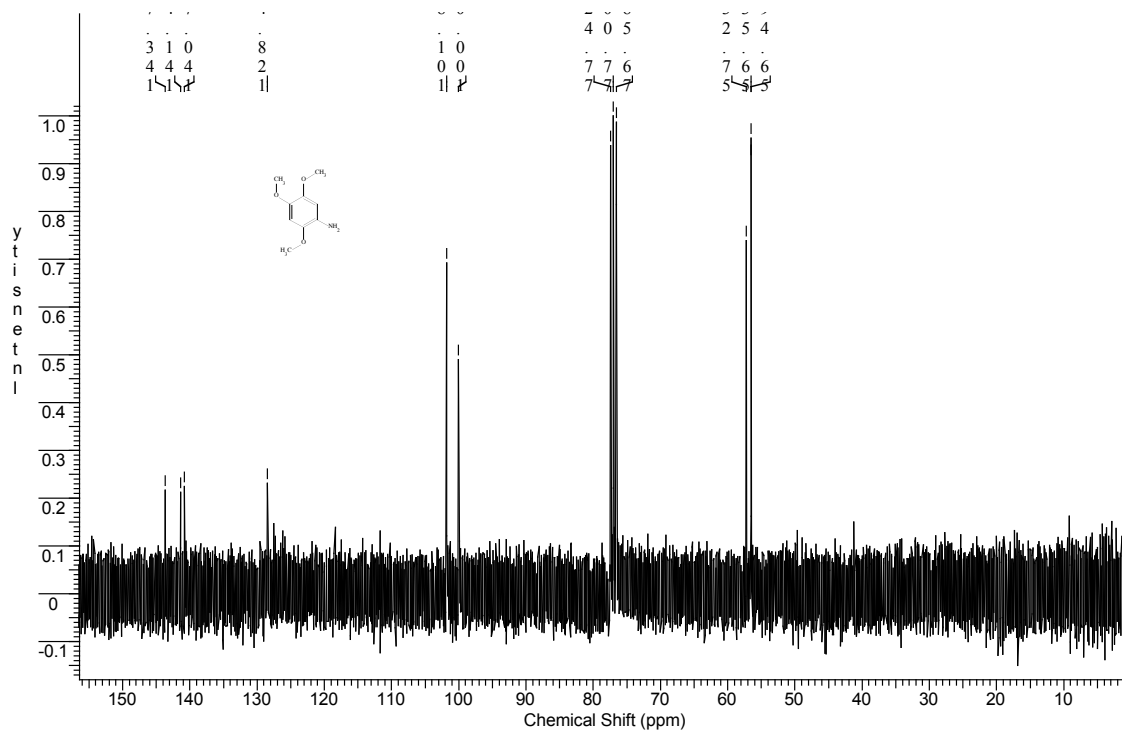

**<sup>13</sup>C NMR (CDCl<sub>3</sub>, 75 MHz) of Compound 3o**

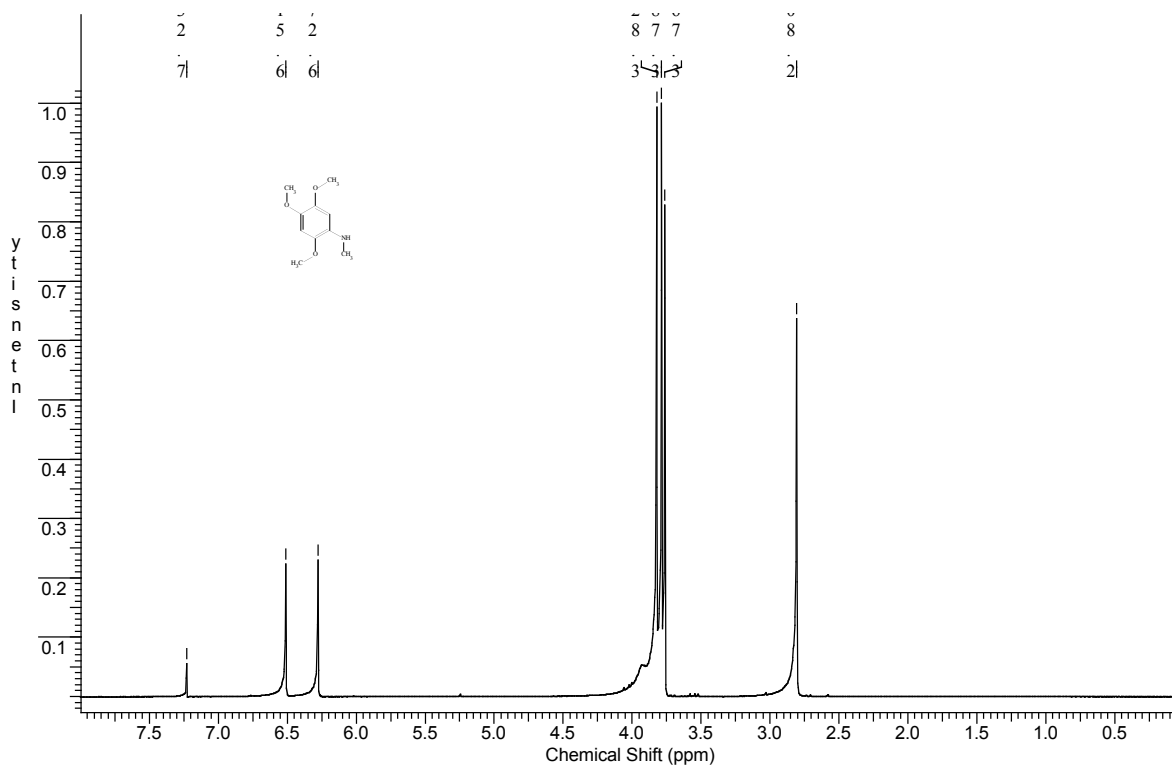

**<sup>1</sup>H NMR (CDCl<sub>3</sub>, 300 MHz) of Compound 3p**

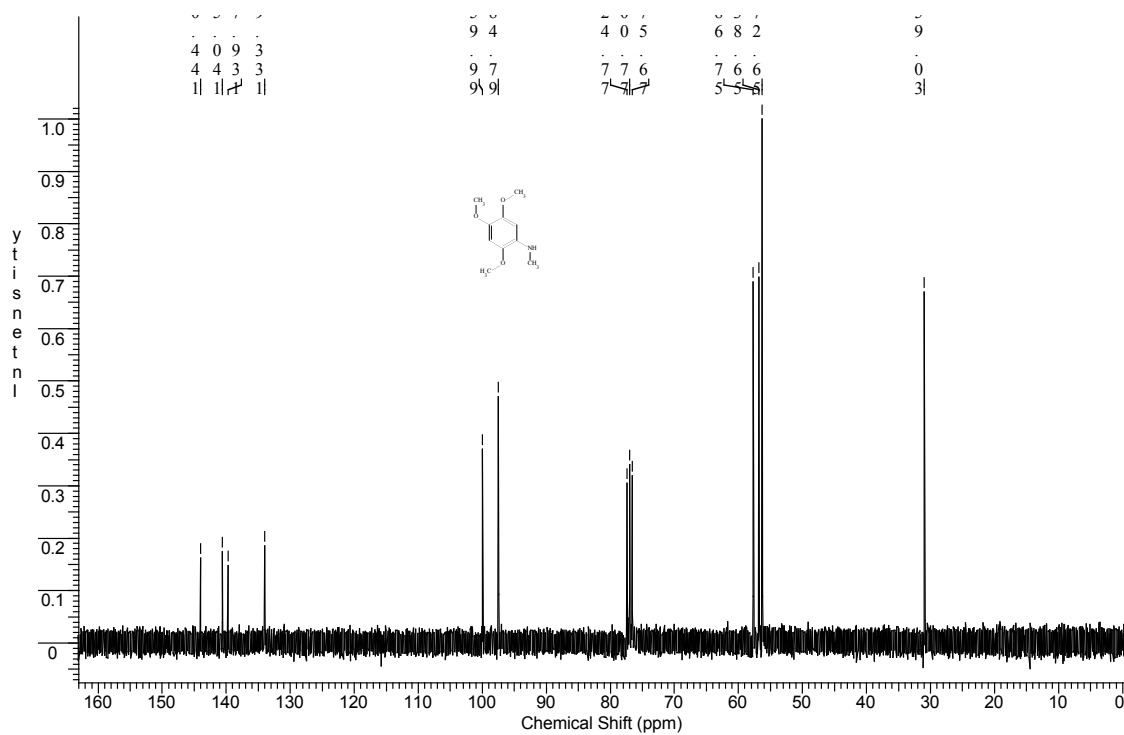

**<sup>13</sup>C NMR (CDCl<sub>3</sub>, 75 MHz) of Compound 3p**



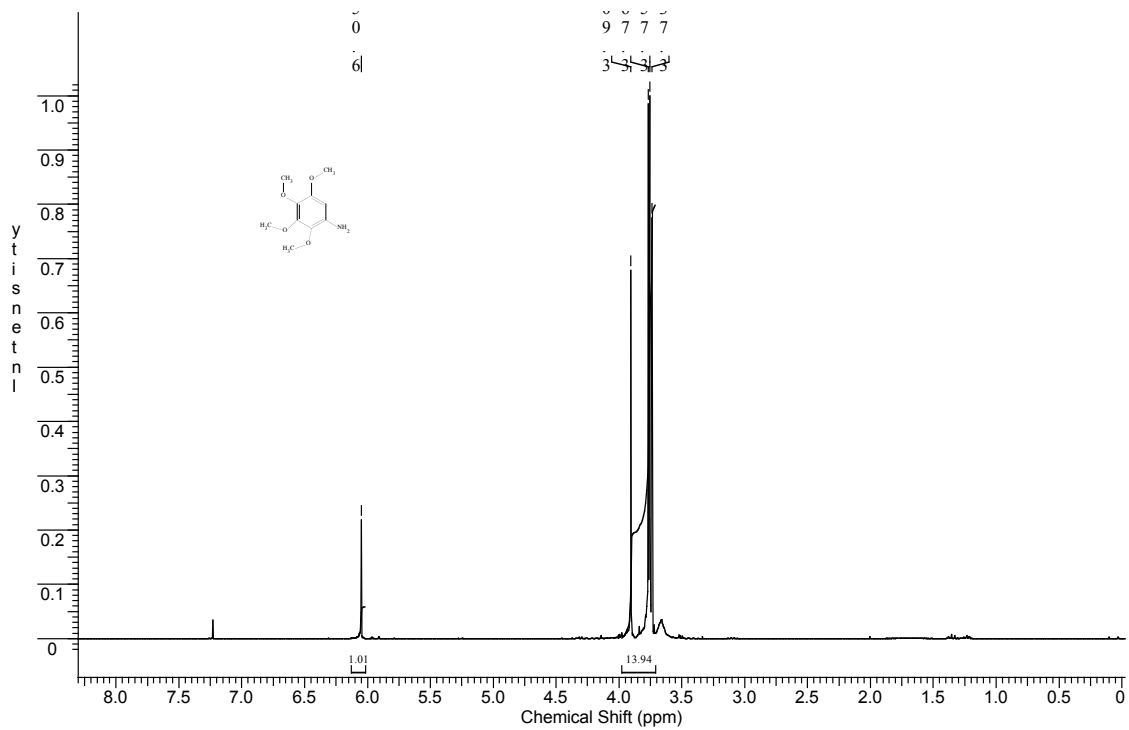

**<sup>1</sup>H NMR (CDCl<sub>3</sub>, 300 MHz) of Compound 3q**

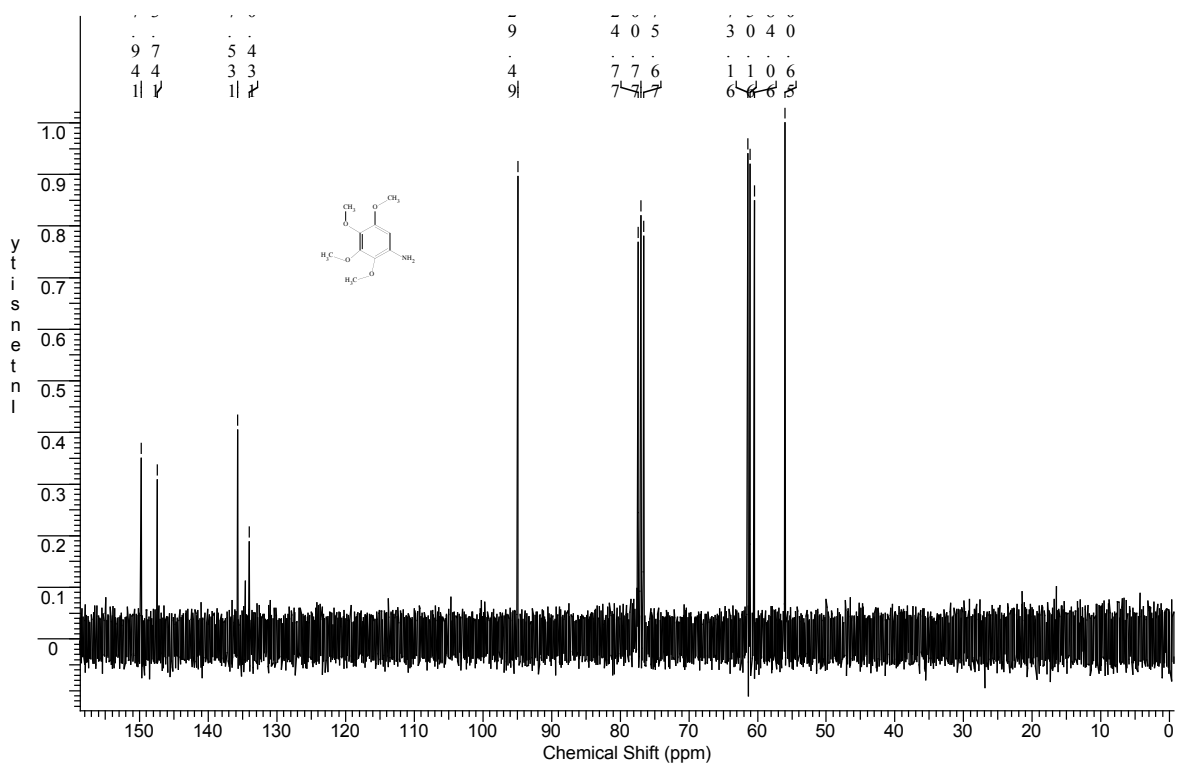

**<sup>13</sup>C NMR (CDCl<sub>3</sub>, 75 MHz) of Compound 3q**

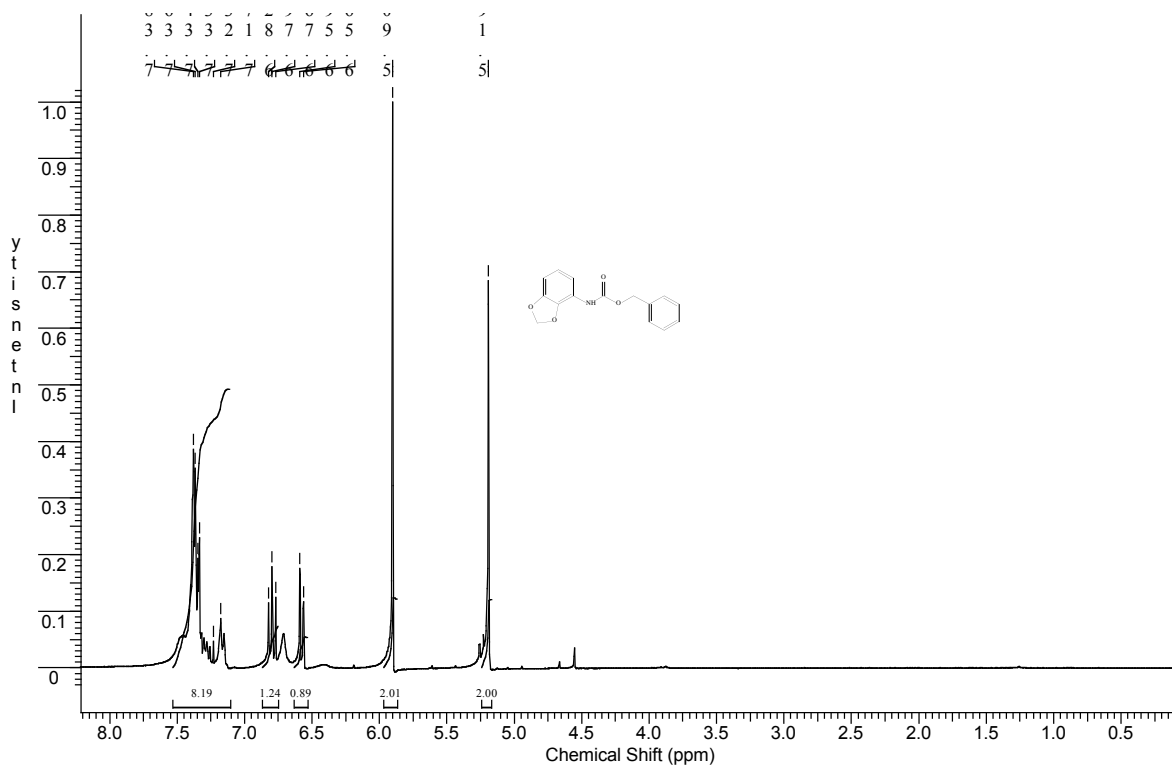

**<sup>1</sup>H NMR (CDCl<sub>3</sub>, 300 MHz) of Compound 6a**

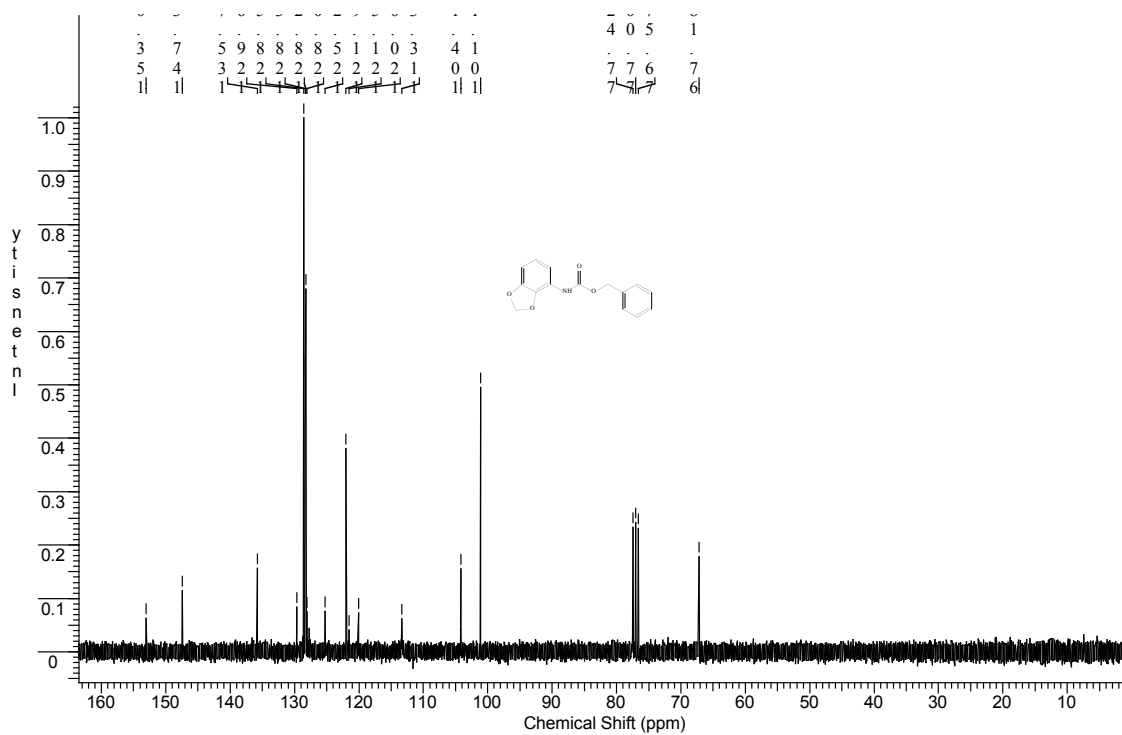

**<sup>13</sup>C NMR (CDCl<sub>3</sub>, 75 MHz) of Compound 6a**

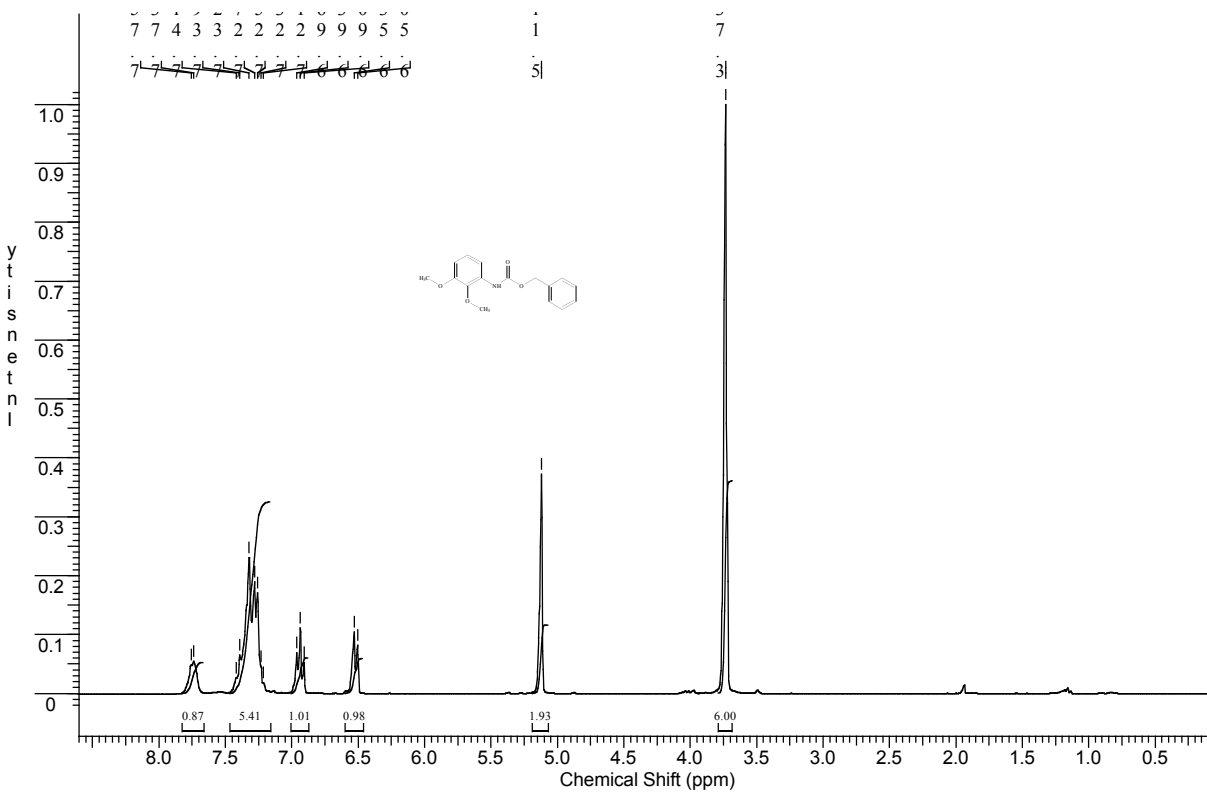

**<sup>1</sup>H NMR (CDCl<sub>3</sub>, 300 MHz) of Compound 6g**

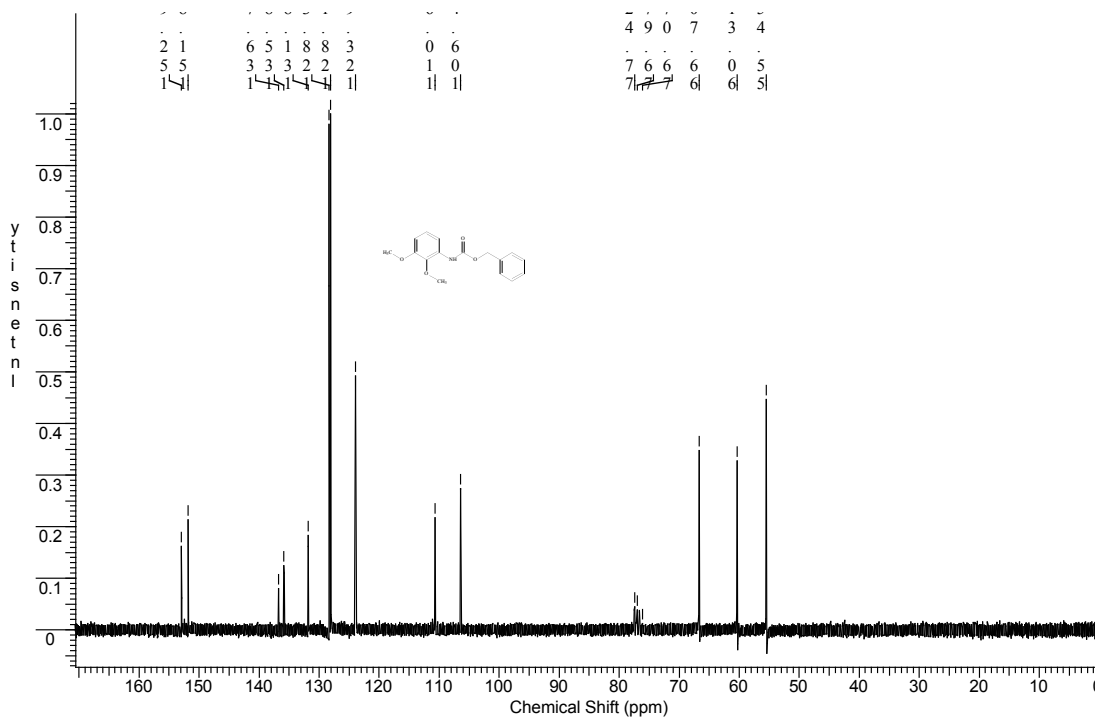

**<sup>13</sup>C NMR (CDCl<sub>3</sub>, 75 MHz) of Compound 6g**

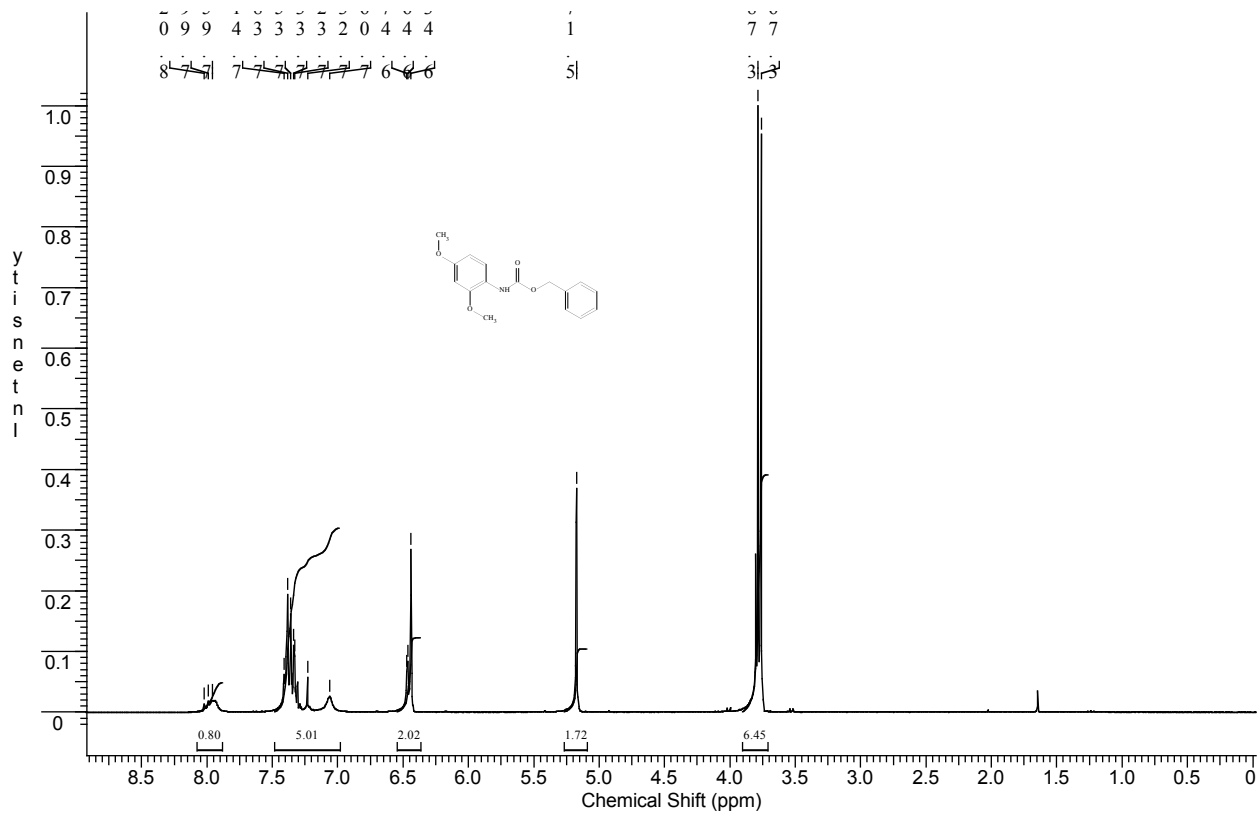

**<sup>1</sup>H NMR (CDCl<sub>3</sub>, 300 MHz) of Compound 6i**

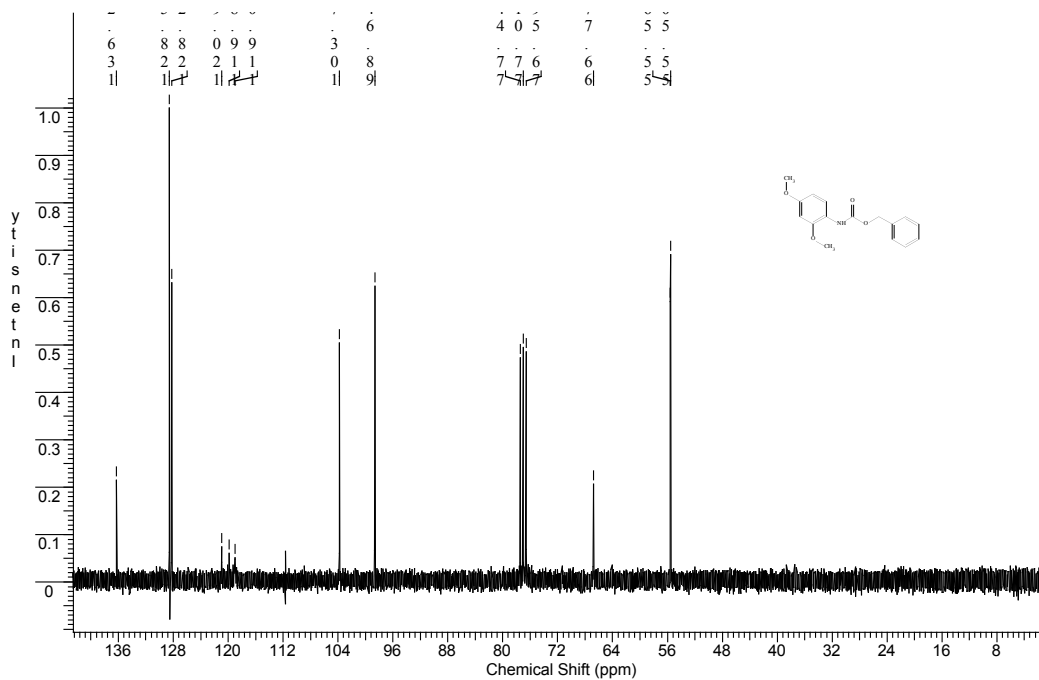

**<sup>13</sup>C NMR (CDCl<sub>3</sub>, 75 MHz) of Compound 6i**

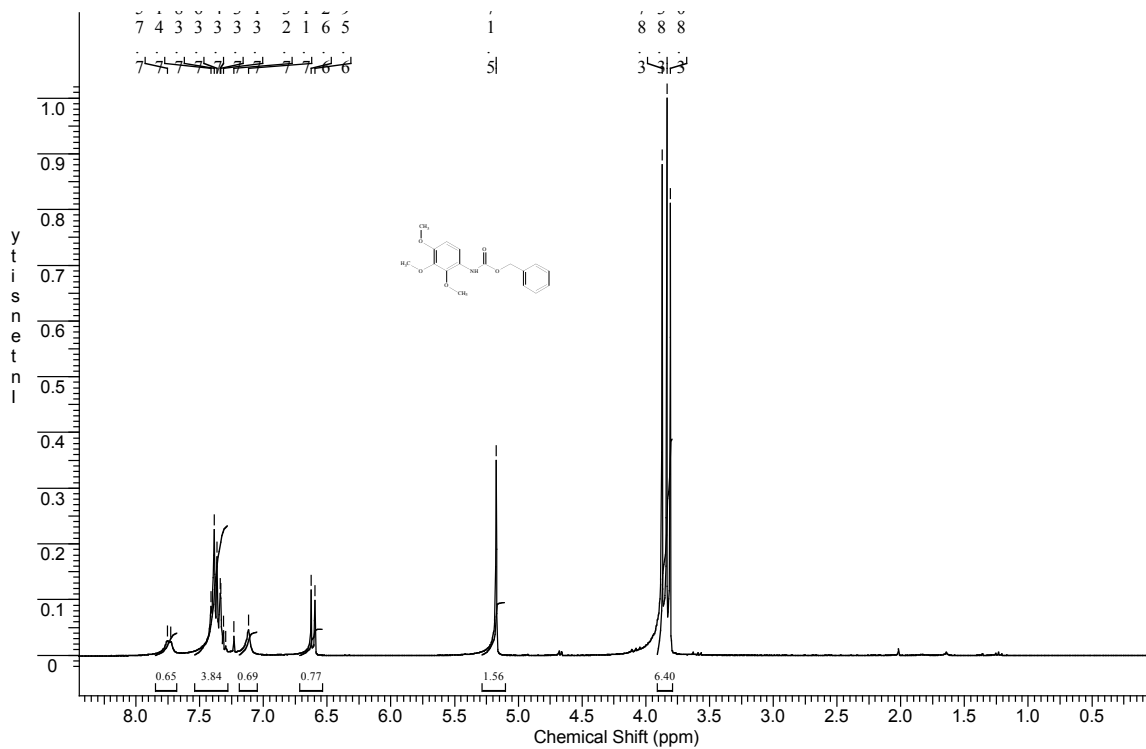

**<sup>1</sup>H NMR (CDCl<sub>3</sub>, 300 MHz) of Compound 6m**

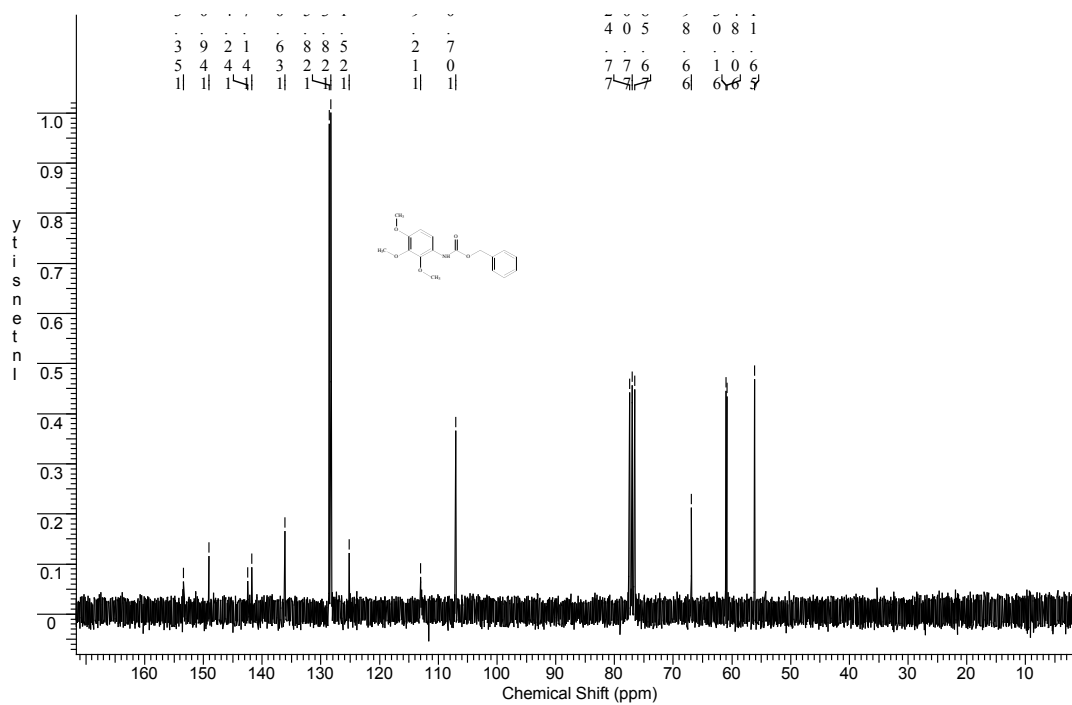

**<sup>13</sup>C NMR (CDCl<sub>3</sub>, 75 MHz) of Compound 6m**

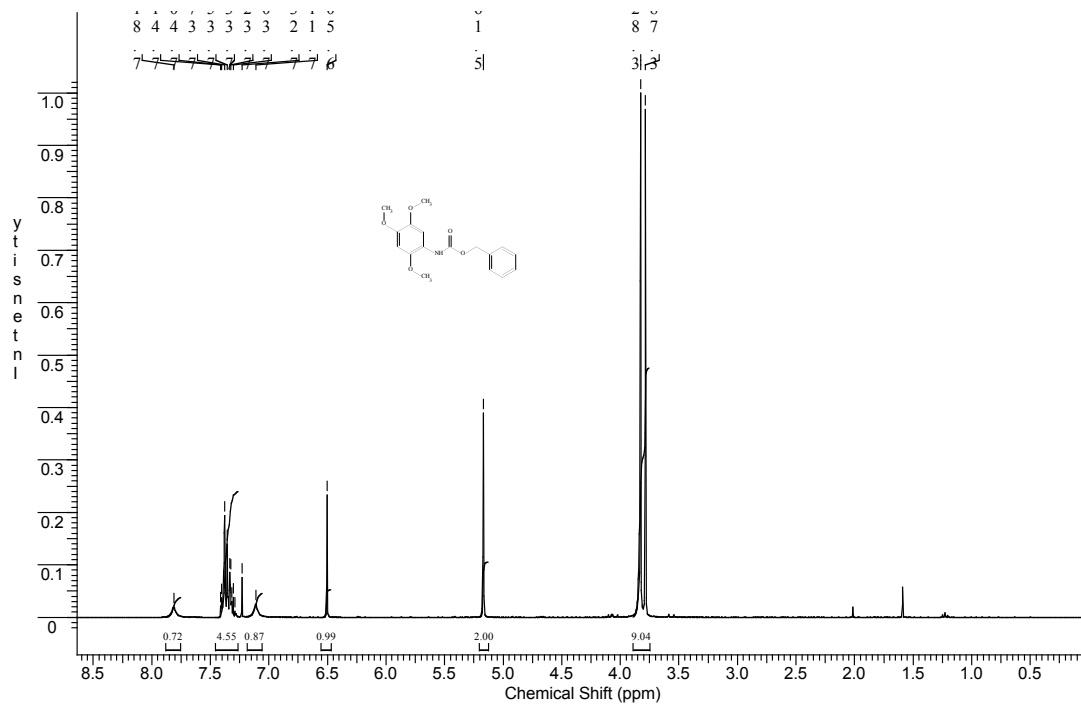

**<sup>1</sup>H NMR (CDCl<sub>3</sub>, 300 MHz) of Compound 60**

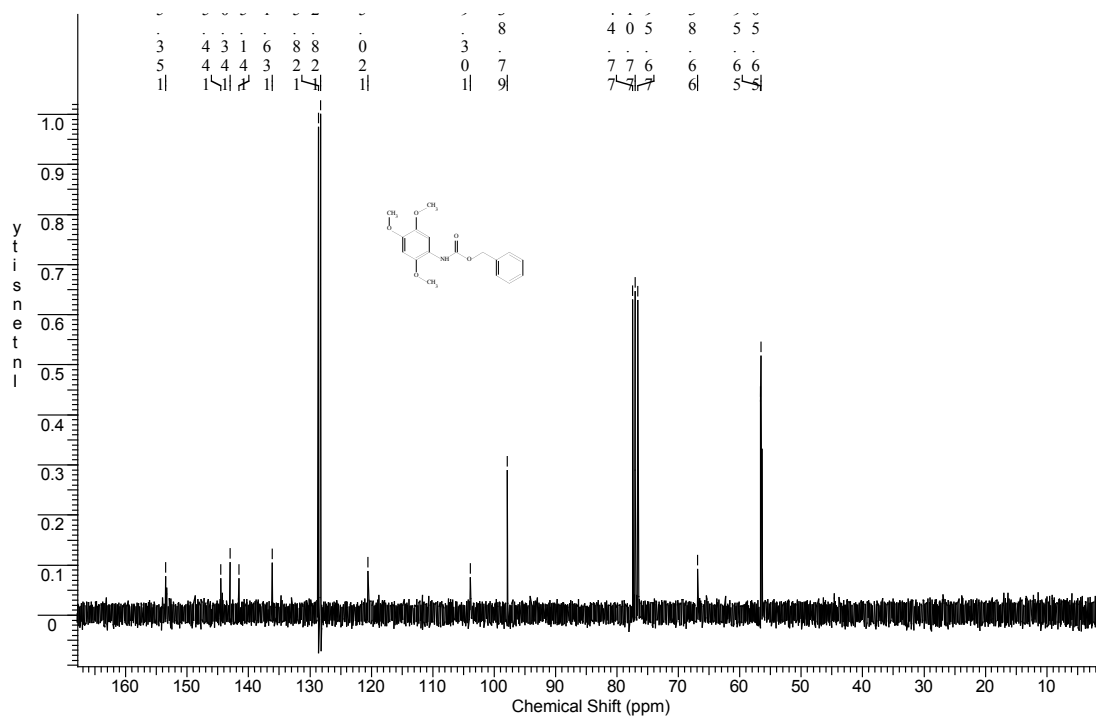

**<sup>13</sup>C NMR (CDCl<sub>3</sub>, 75 MHz) of Compound 60**

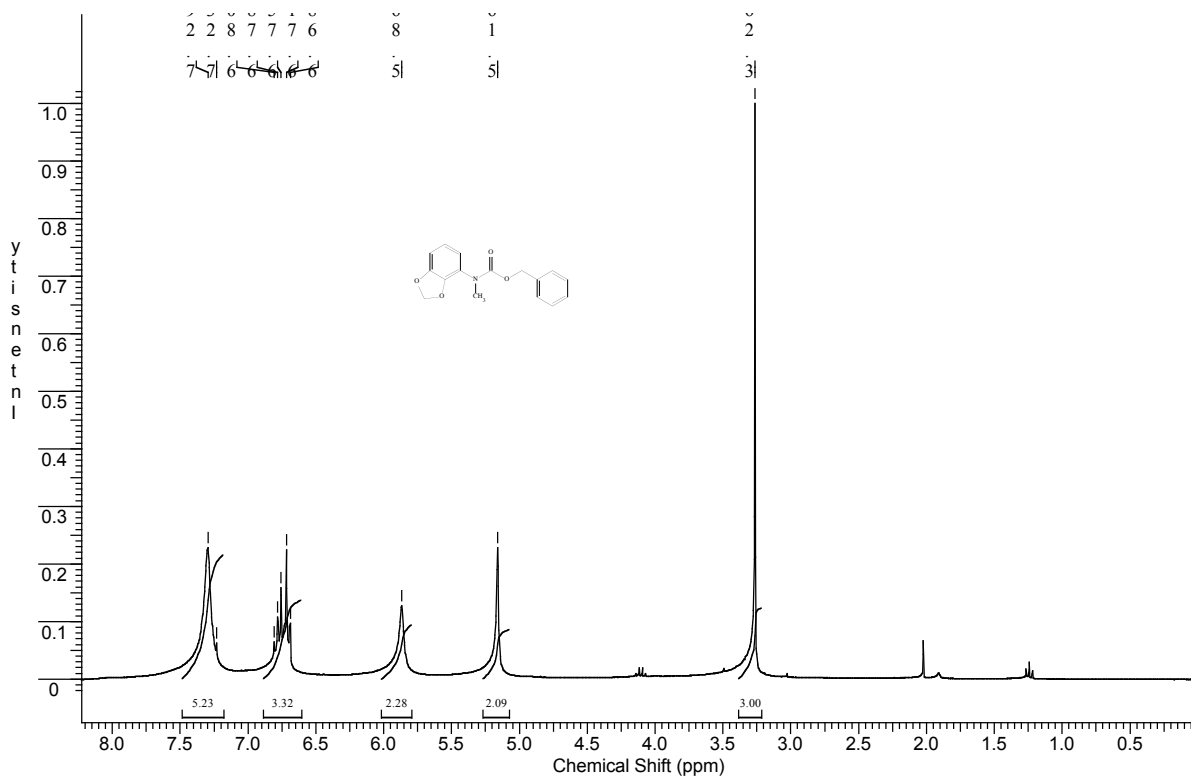

**<sup>1</sup>H NMR (CDCl<sub>3</sub>, 300 MHz) of Compound 7a**

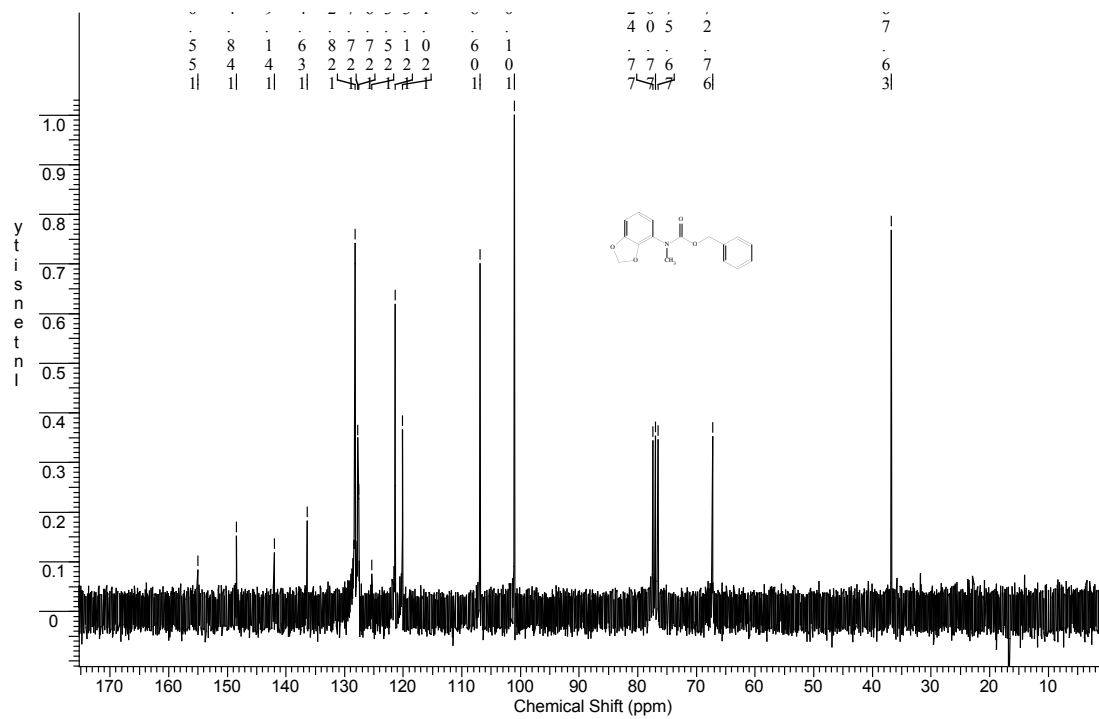

**<sup>13</sup>C NMR (CDCl<sub>3</sub>, 75 MHz) of Compound 7a**

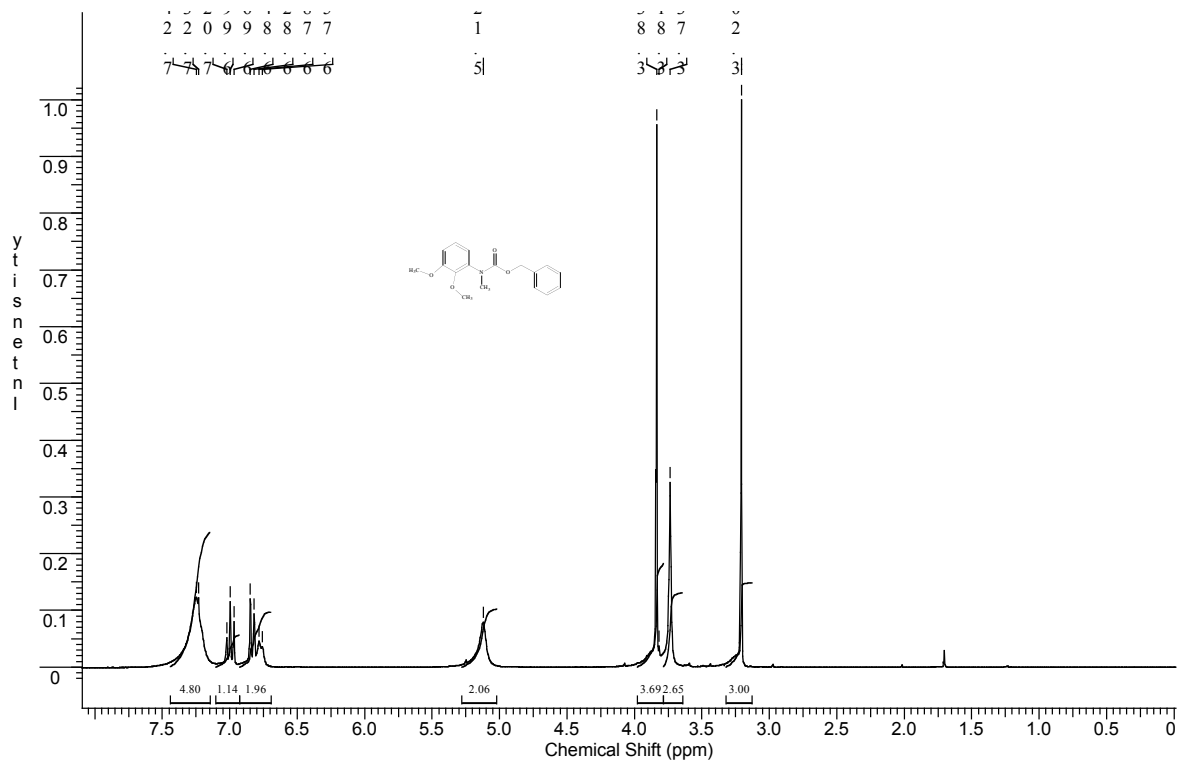

**<sup>1</sup>H NMR (CDCl<sub>3</sub>, 300 MHz) of Compound 7g**

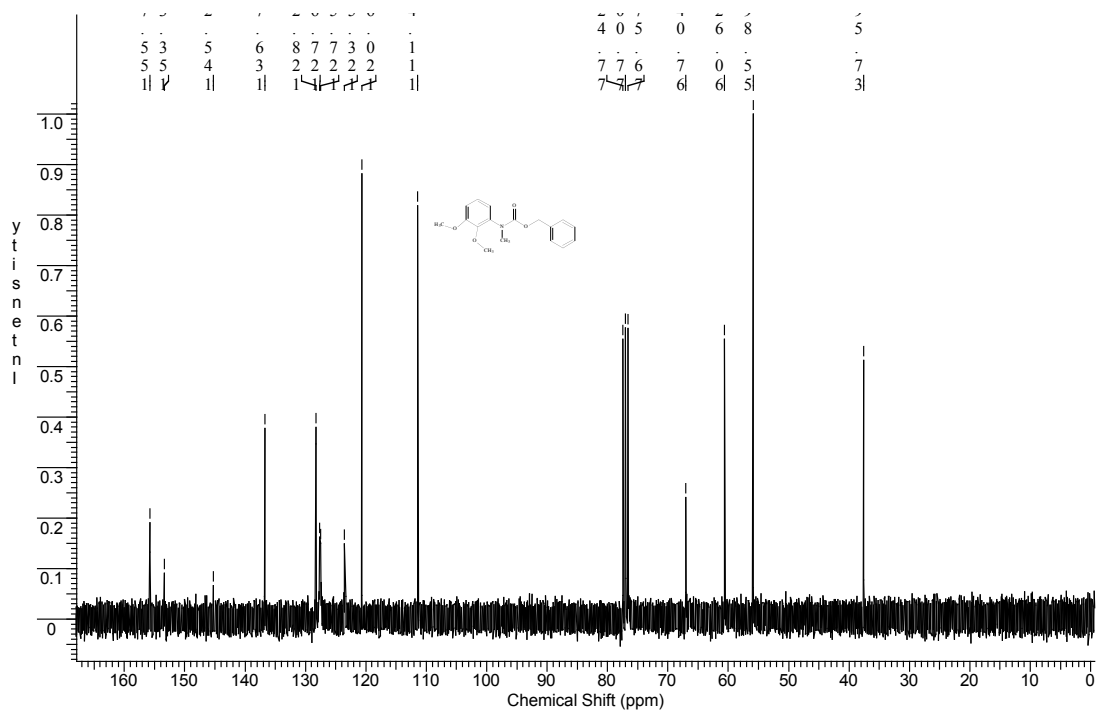

**<sup>13</sup>C NMR (CDCl<sub>3</sub>, 75 MHz) of Compound 7g**



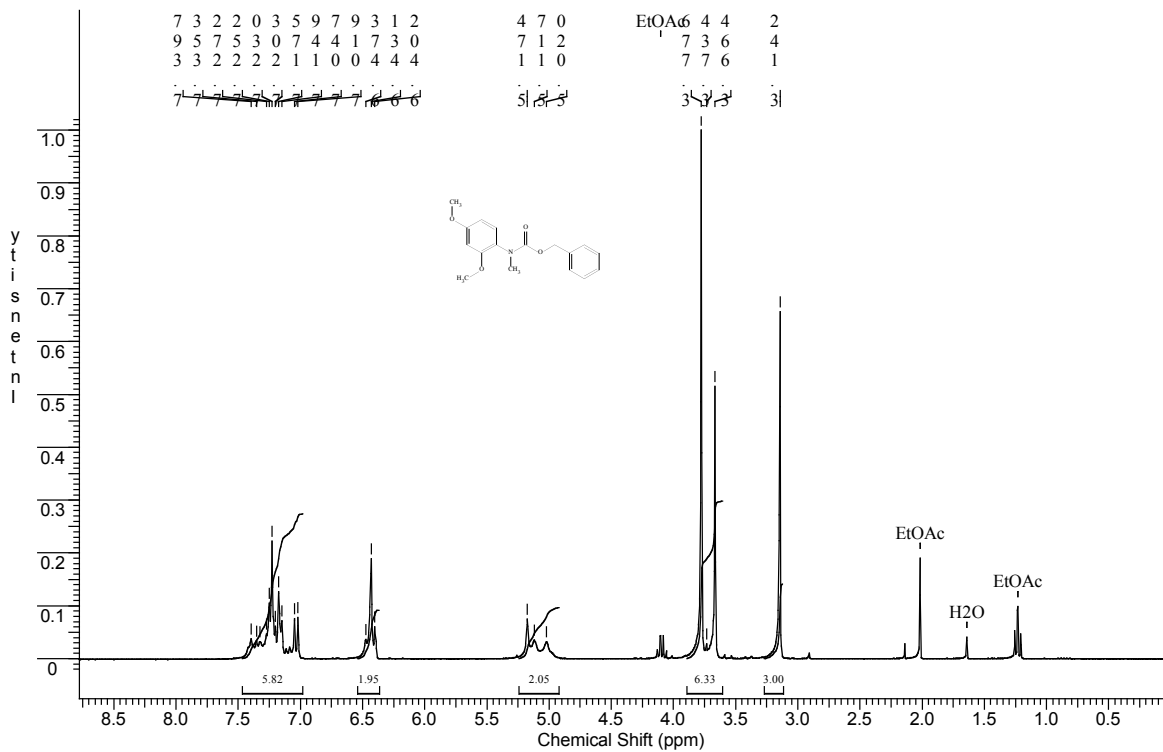

**<sup>1</sup>H NMR (CDCl<sub>3</sub>, 300 MHz) of Compound 7i**

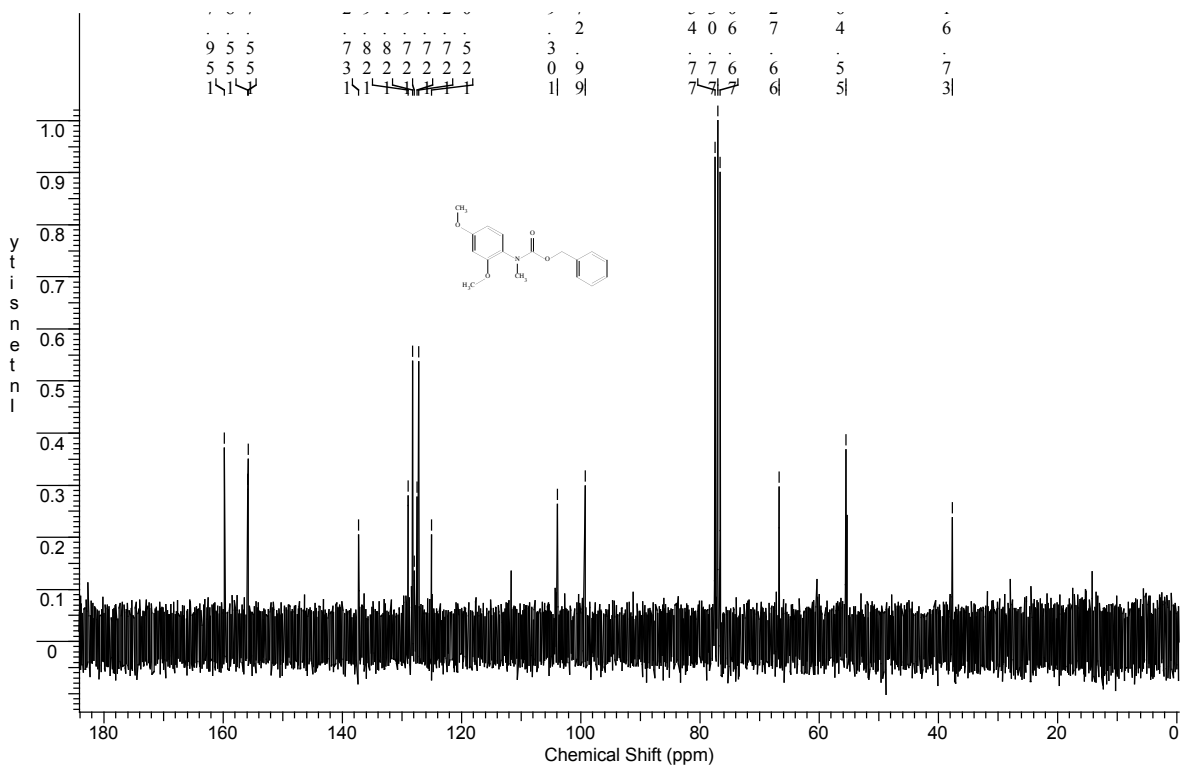

**<sup>13</sup>C NMR (CDCl<sub>3</sub>, 75 MHz) of Compound 7i**

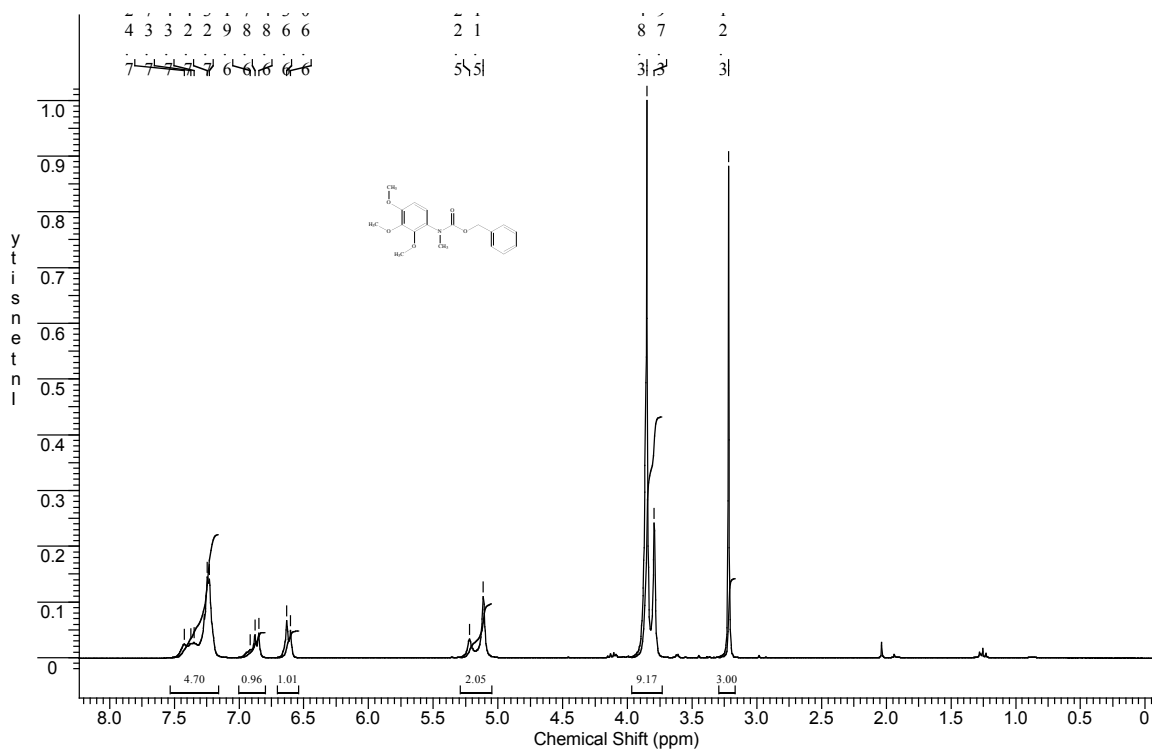

**<sup>1</sup>H NMR (CDCl<sub>3</sub>, 300 MHz) of Compound 7m**

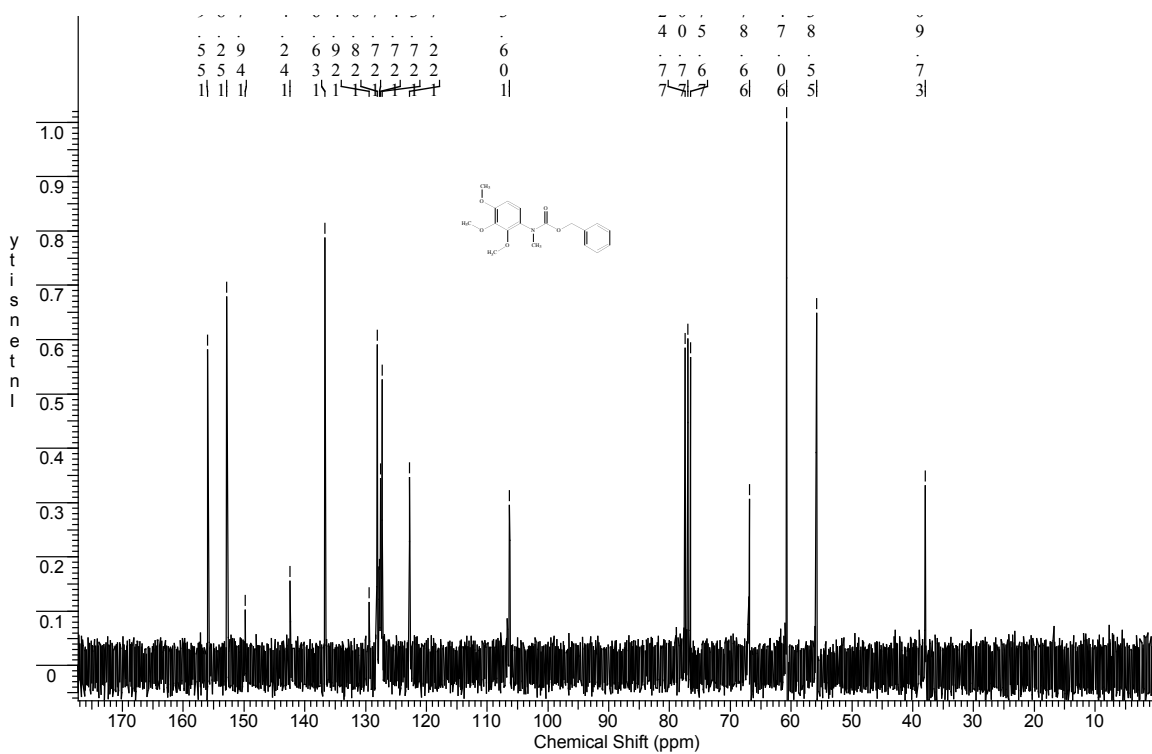

**<sup>13</sup>C NMR (CDCl<sub>3</sub>, 75 MHz) of Compound 7m**

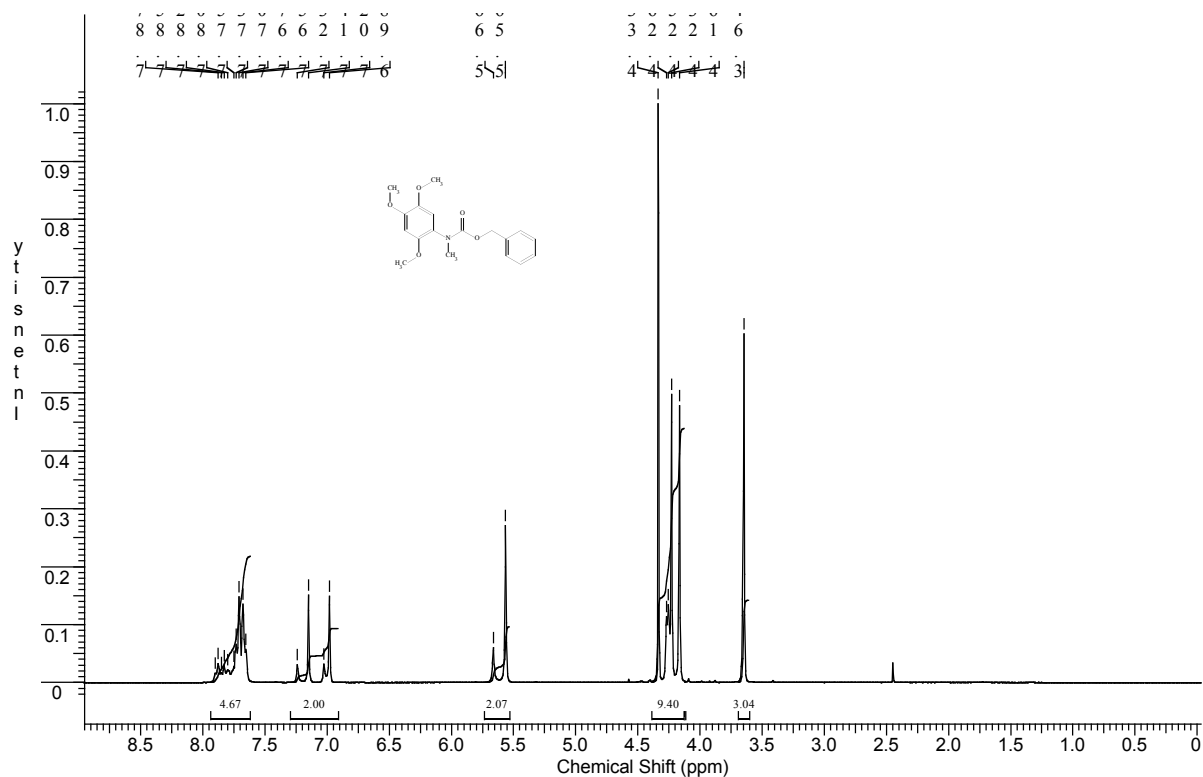

**<sup>1</sup>H NMR (CDCl<sub>3</sub>, 300 MHz) of Compound 7o**

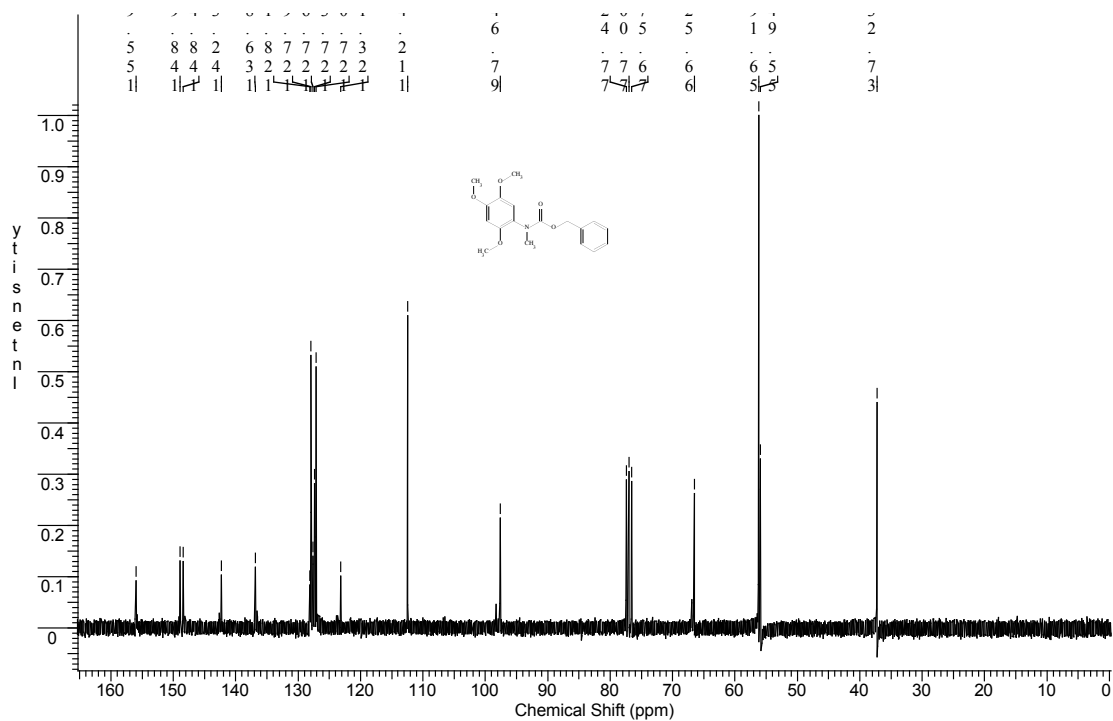

**$^{13}\text{C}$  NMR ( $\text{CDCl}_3$ , 75 MHz) of Compound 7o**

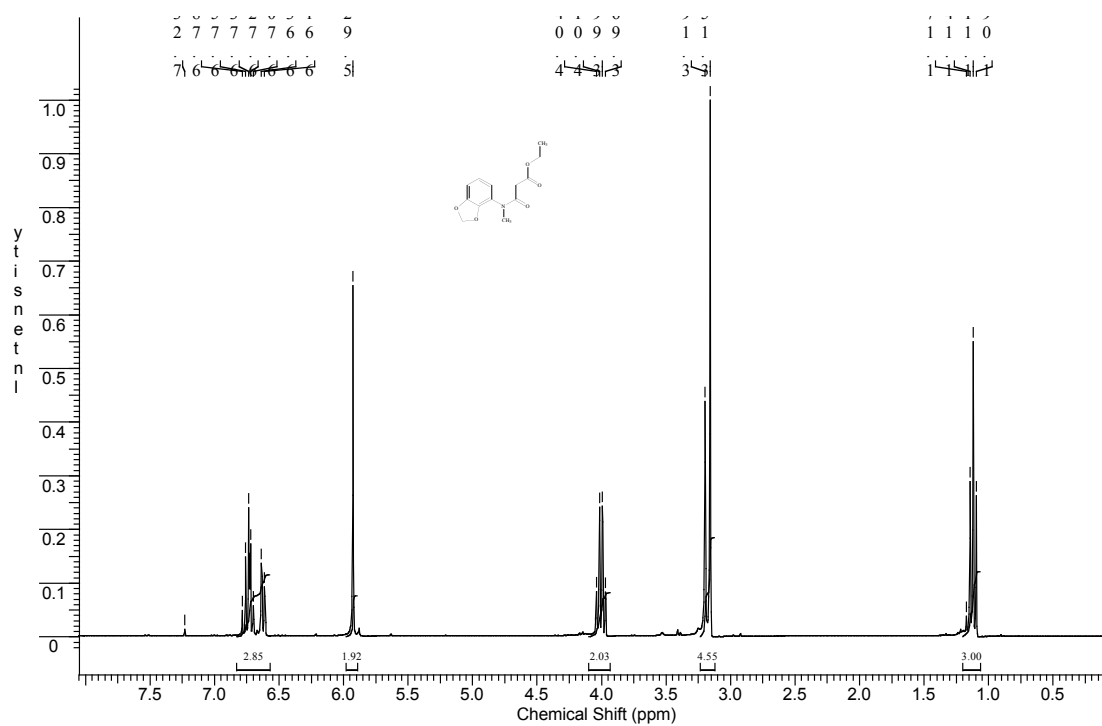

**$^1\text{H}$  NMR ( $\text{CDCl}_3$ , 300 MHz) of Compound 8**

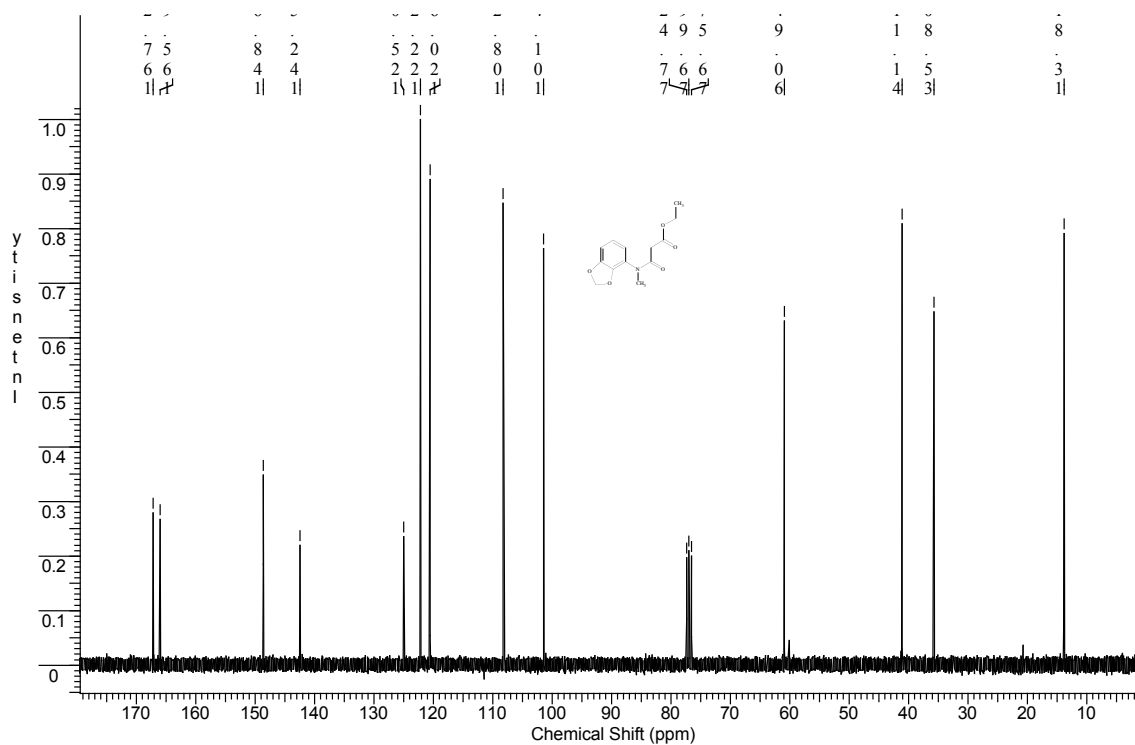

**$^{13}\text{C}$  NMR ( $\text{CDCl}_3$ , 75 MHz) of Compound 8**

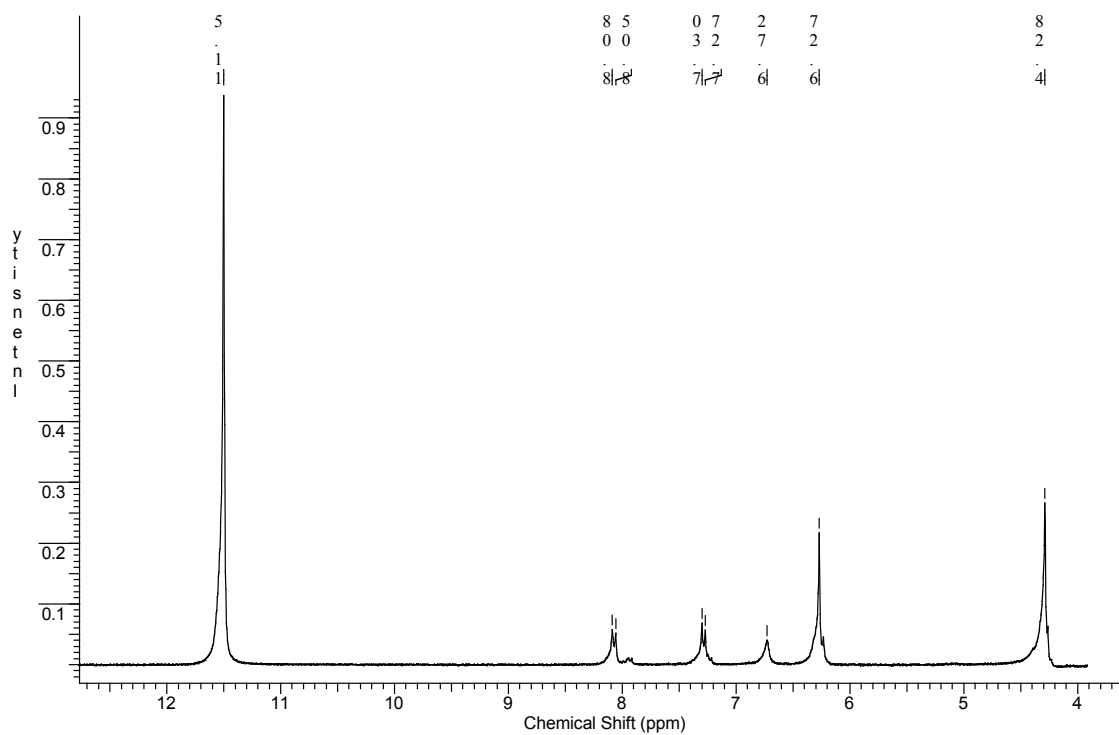

**$^1\text{H}$  NMR ( $\text{CF}_3\text{CO}_2\text{D}$ , 300 MHz) of Compound 9**

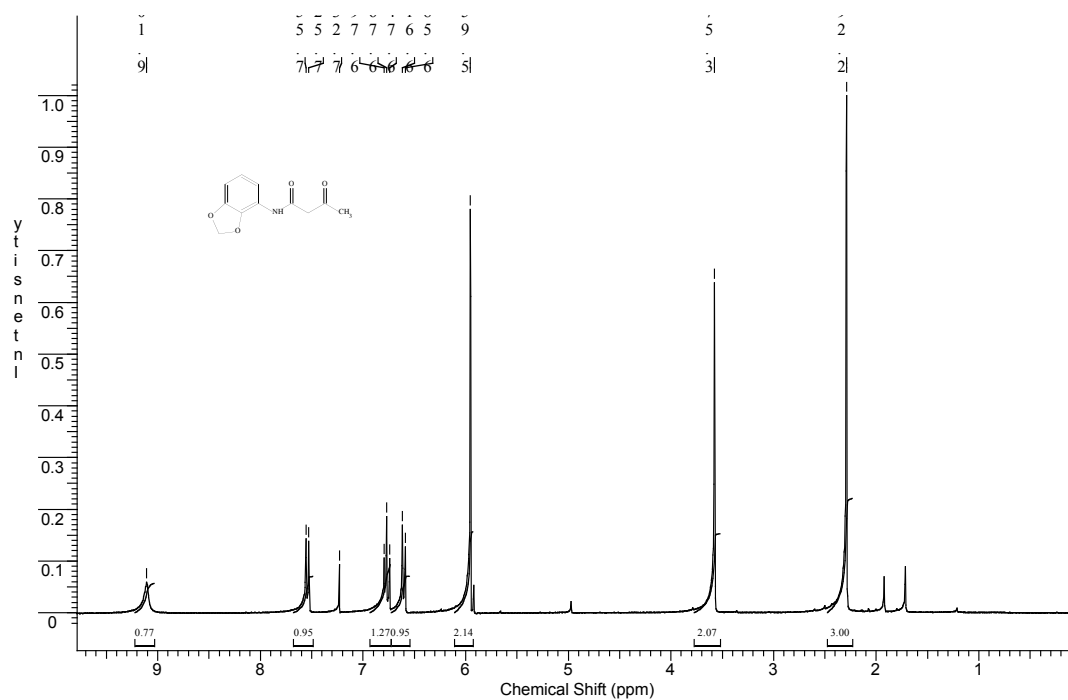

**<sup>1</sup>H NMR (CDCl<sub>3</sub>, 300 MHz) of Compound 10a**

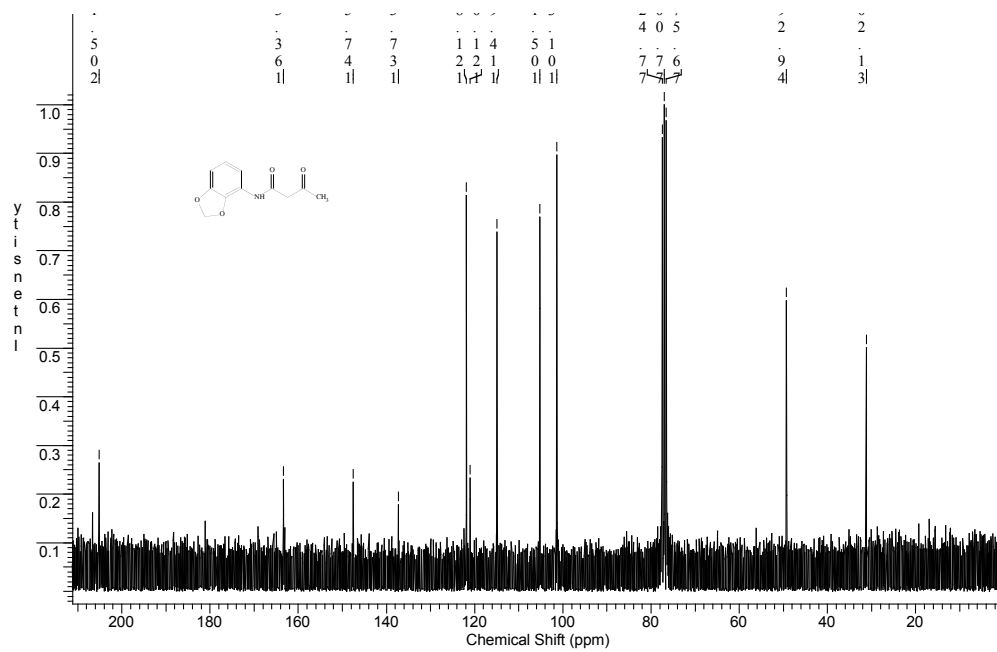

**<sup>13</sup>C NMR (CDCl<sub>3</sub>, 75 MHz) of Compound 10a**

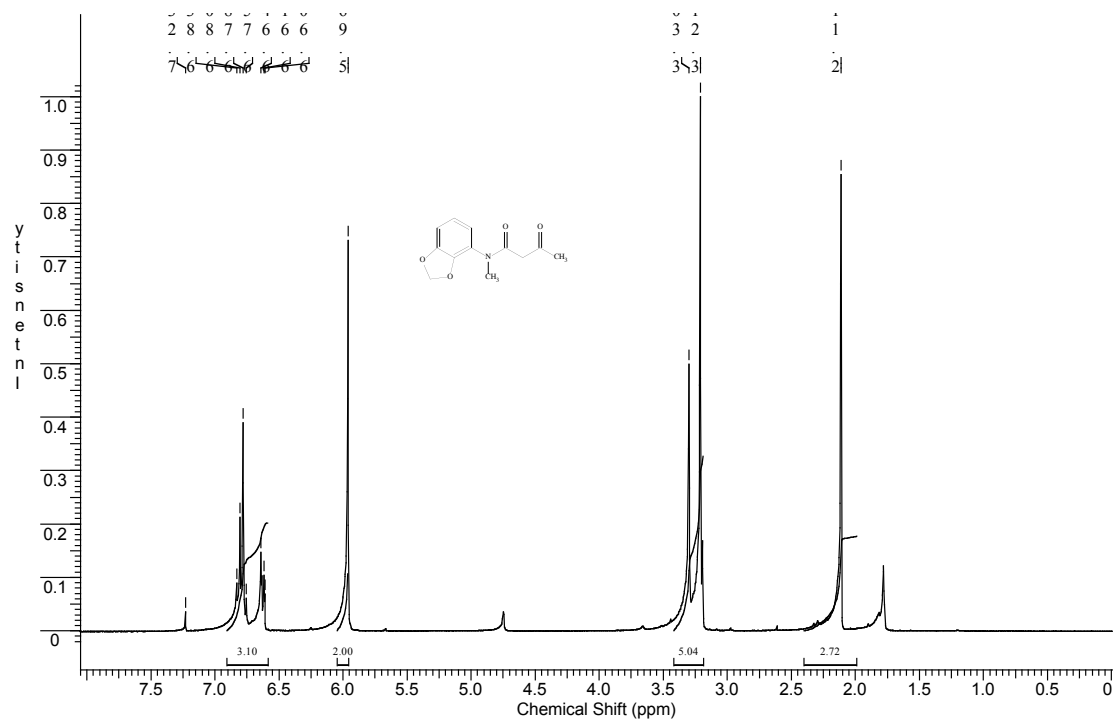

**<sup>1</sup>H NMR (CDCl<sub>3</sub>, 300 MHz) of Compound 10b**

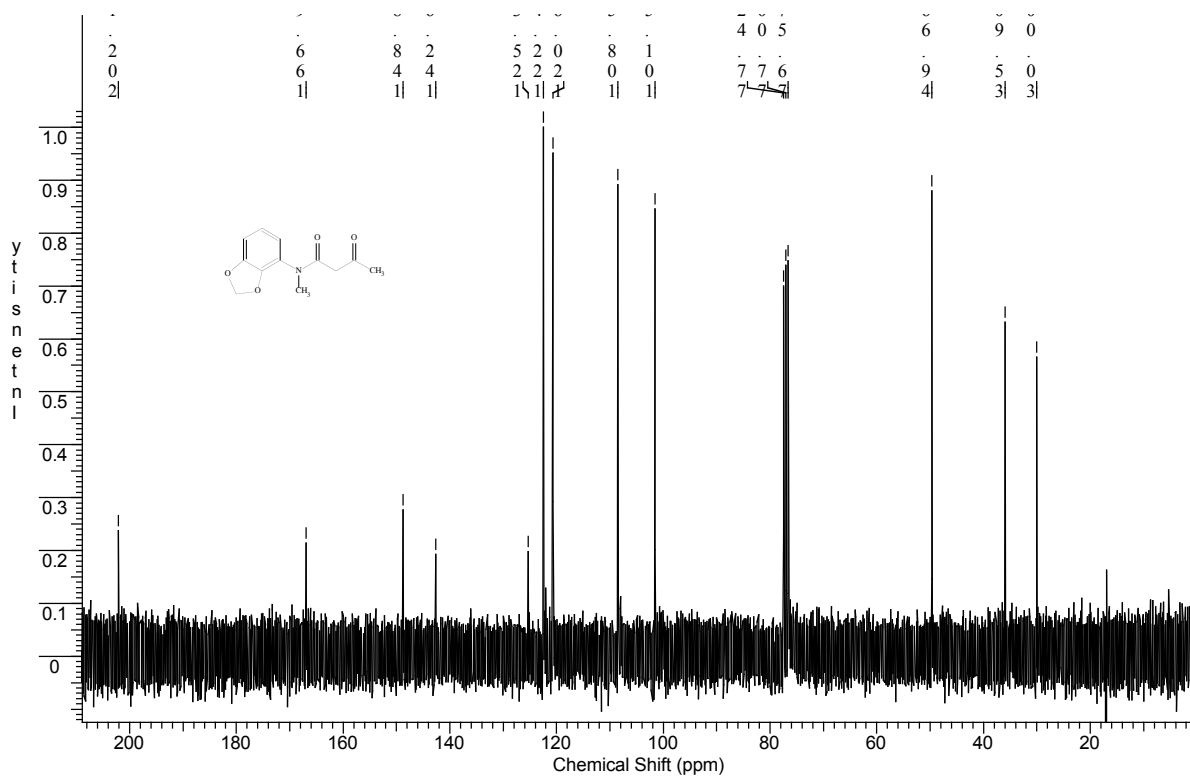

**<sup>13</sup>C NMR (CDCl<sub>3</sub>, 75 MHz) of Compound 10b**

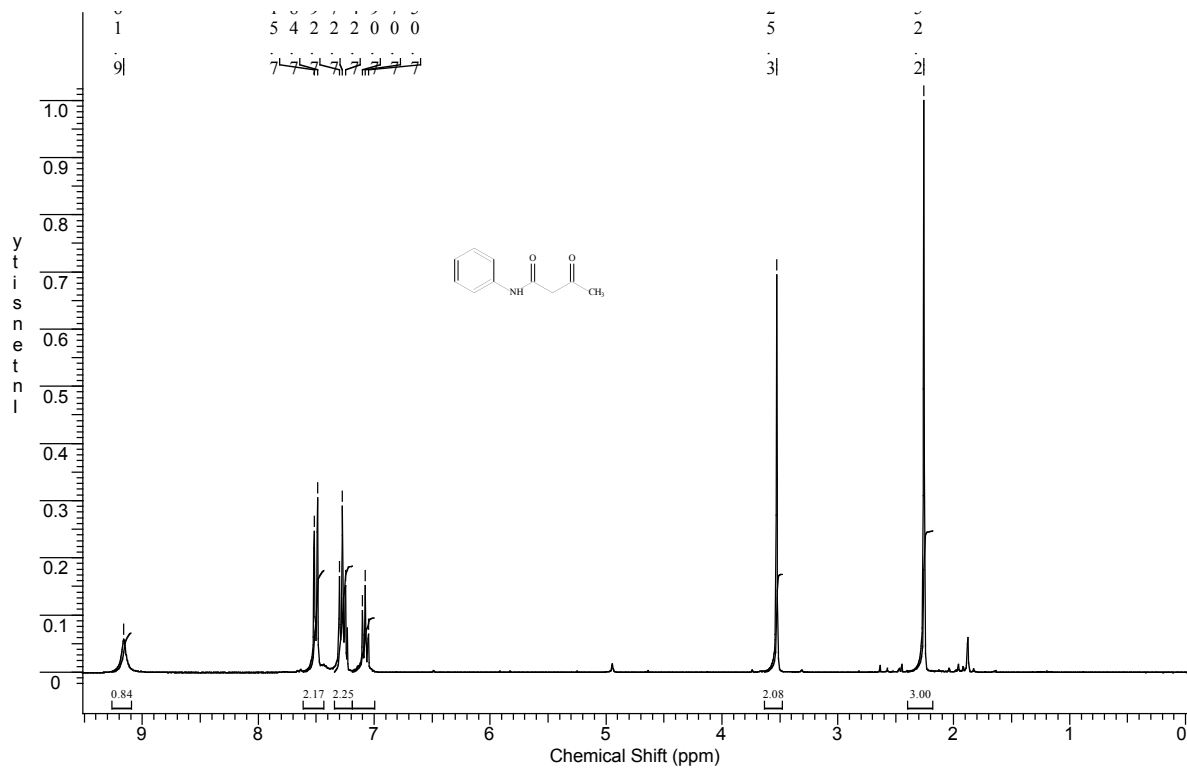

**<sup>1</sup>H NMR (CDCl<sub>3</sub>, 300 MHz) of Compound 10c**

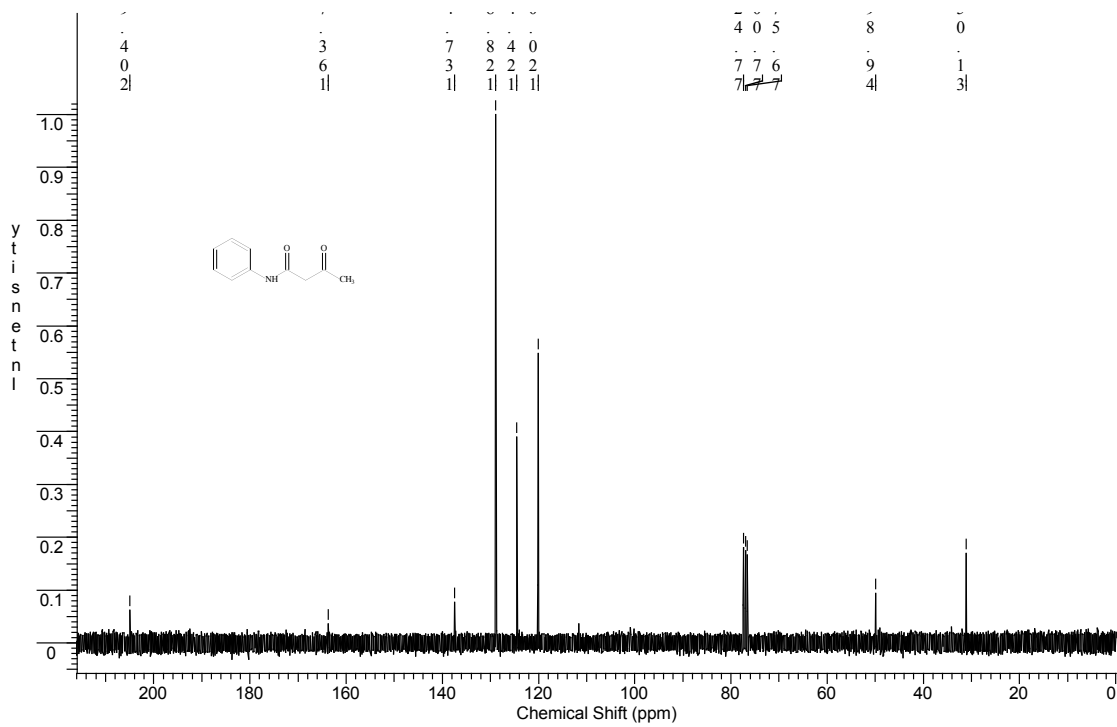

**<sup>13</sup>C NMR (CDCl<sub>3</sub>, 75 MHz) of Compound 10c**



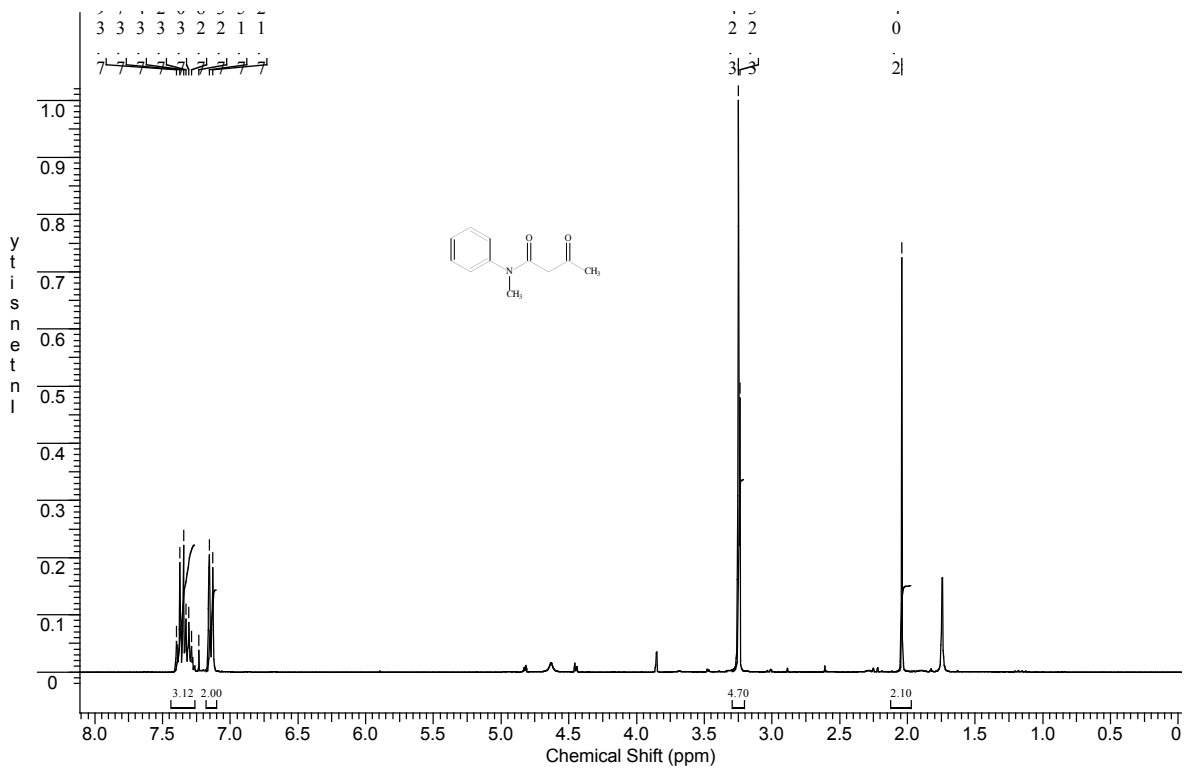

**<sup>1</sup>H NMR (CDCl<sub>3</sub>, 300 MHz) of Compound 10d**

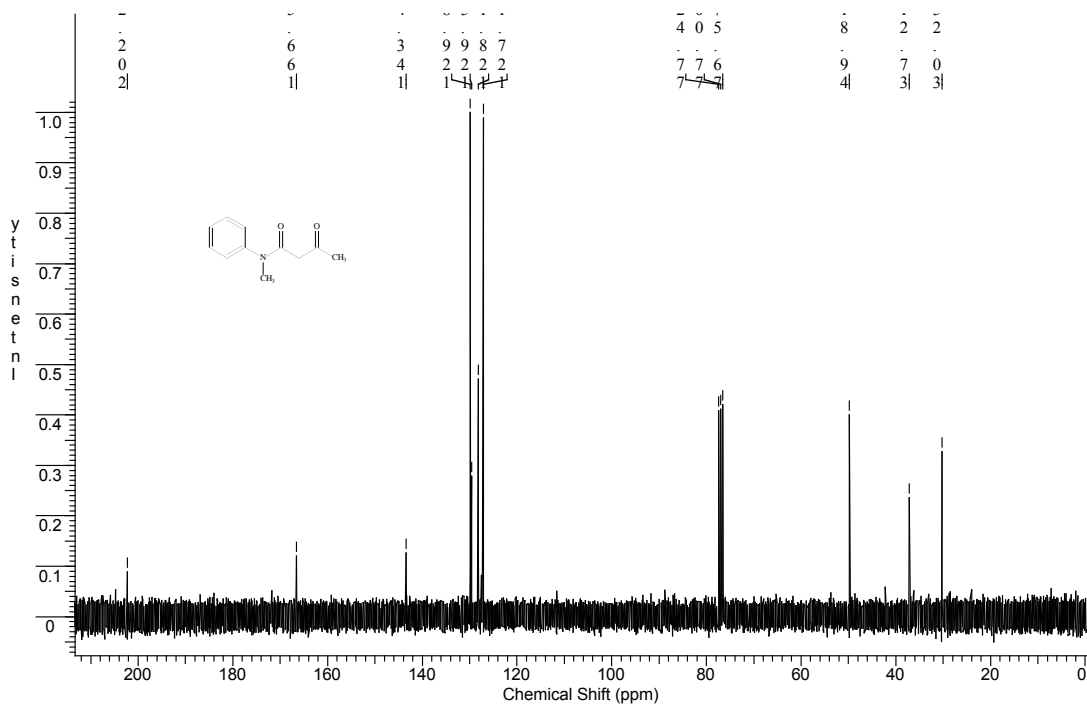

**<sup>13</sup>C NMR (CDCl<sub>3</sub>, 75 MHz) of Compound 10d**

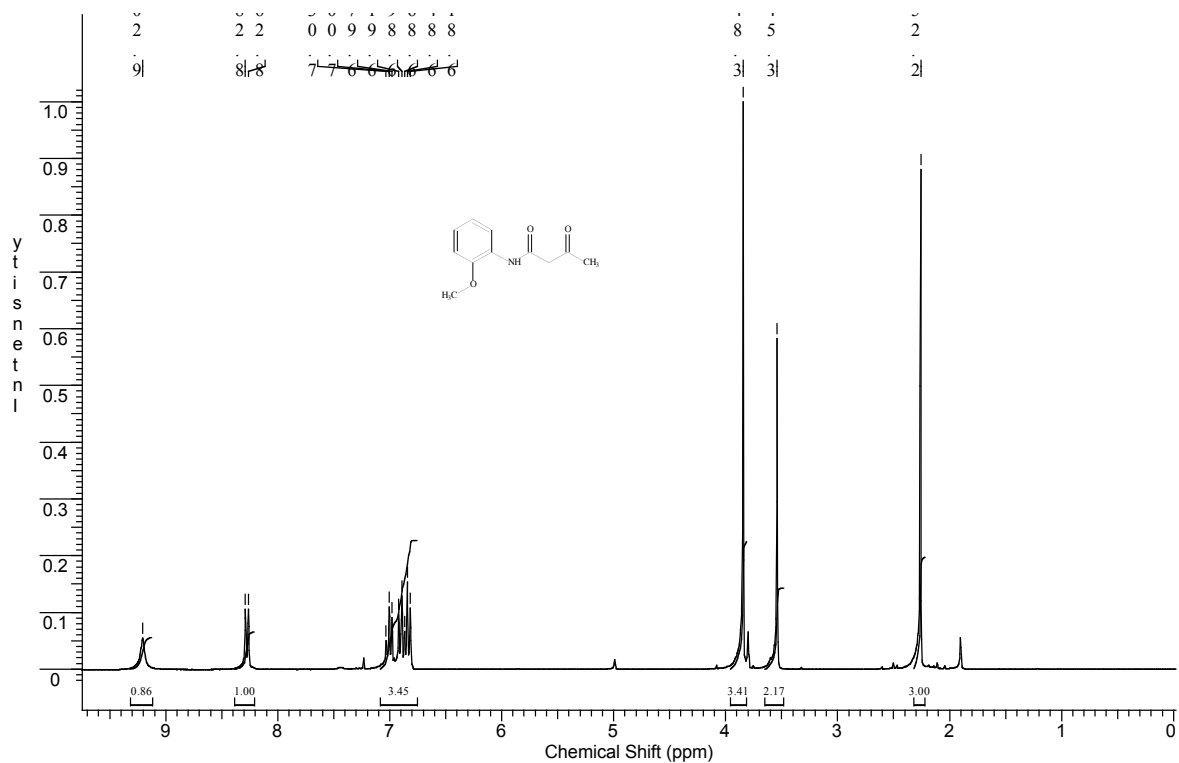

**<sup>1</sup>H NMR (CDCl<sub>3</sub>, 300 MHz) of Compound 10e**

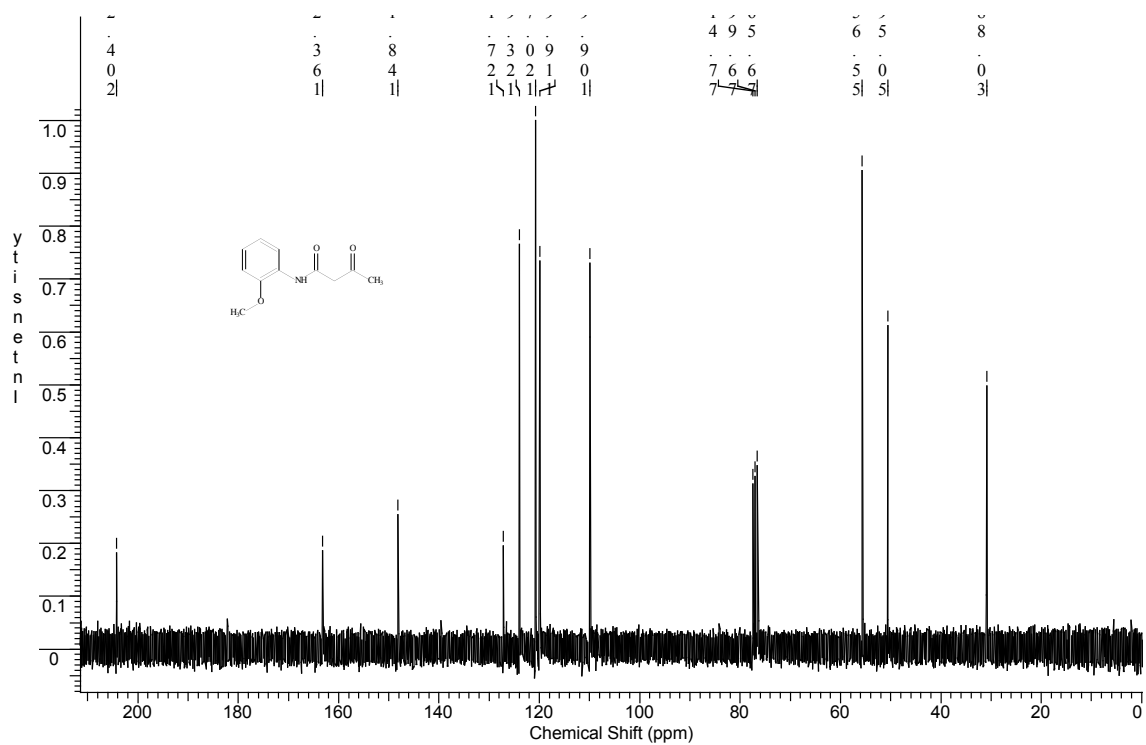

**<sup>13</sup>C NMR (CDCl<sub>3</sub>, 75 MHz) of Compound 10e**

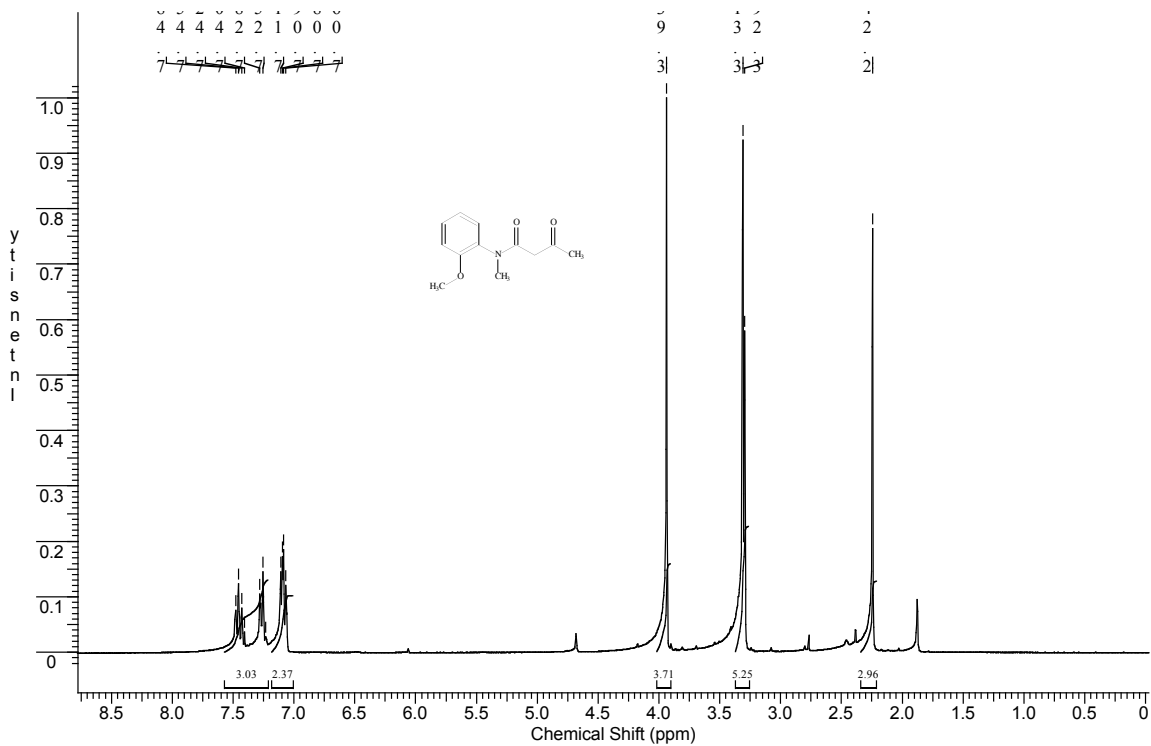

**<sup>1</sup>H NMR (CDCl<sub>3</sub>, 300 MHz) of Compound 10f**

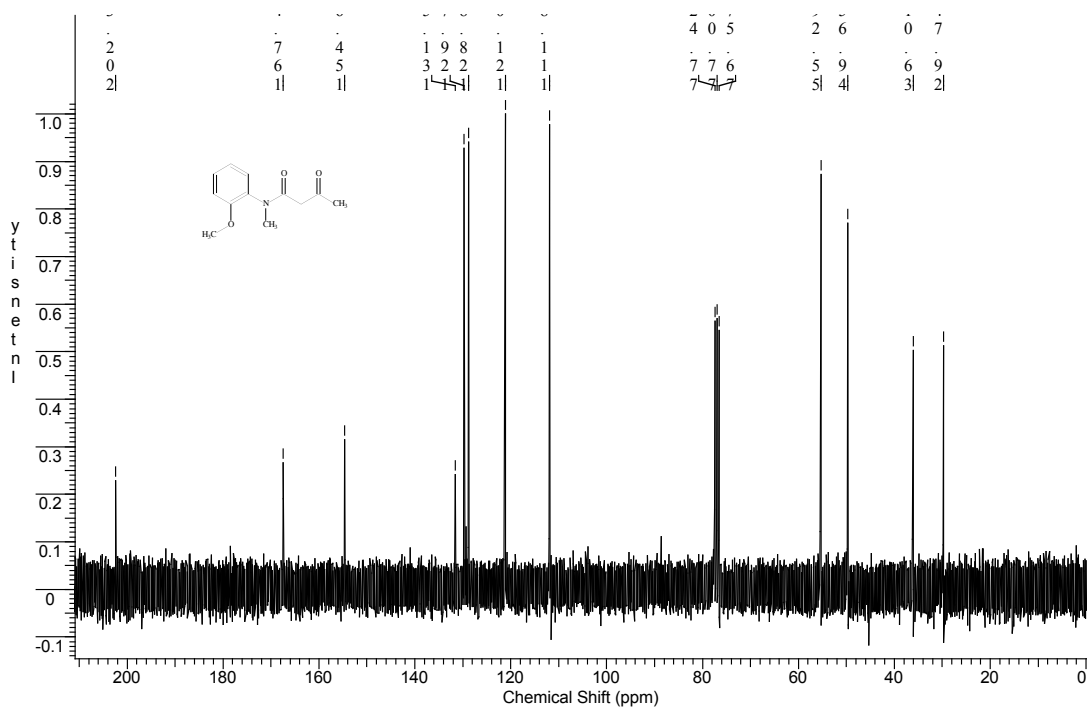

**<sup>13</sup>C NMR (CDCl<sub>3</sub>, 75 MHz) of Compound 10f**

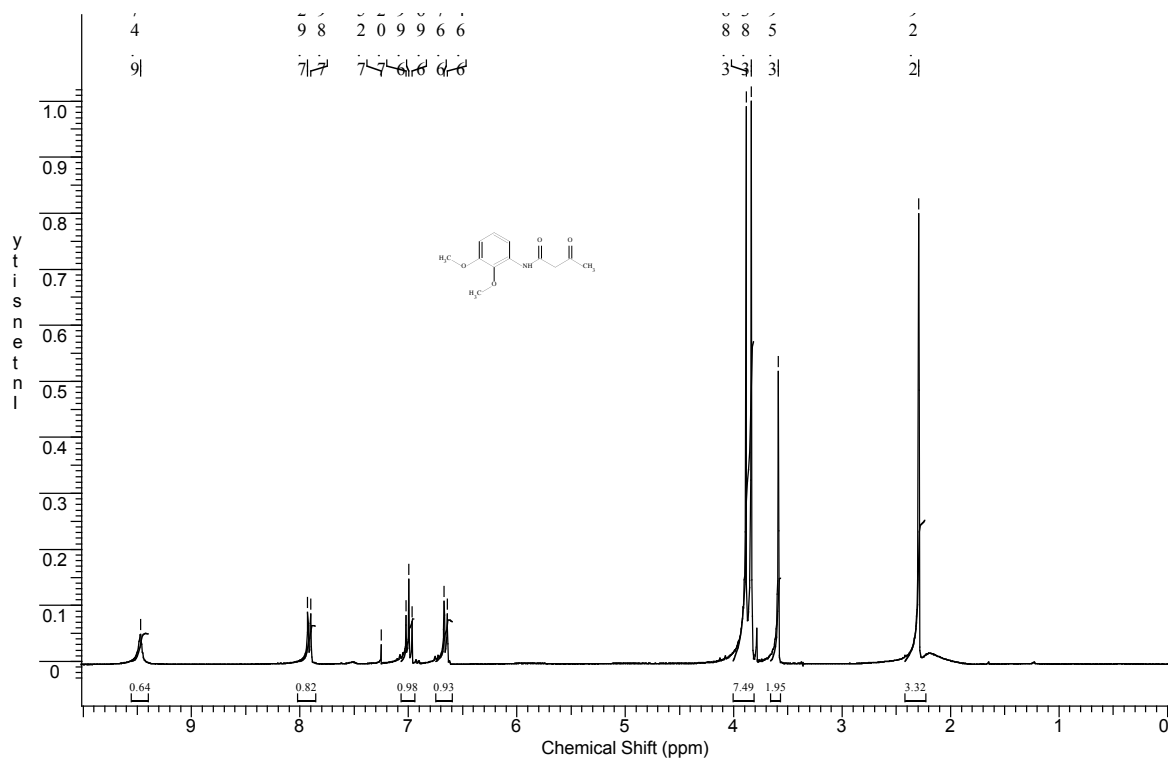

**<sup>1</sup>H NMR (CDCl<sub>3</sub>, 300 MHz) of Compound 10g**

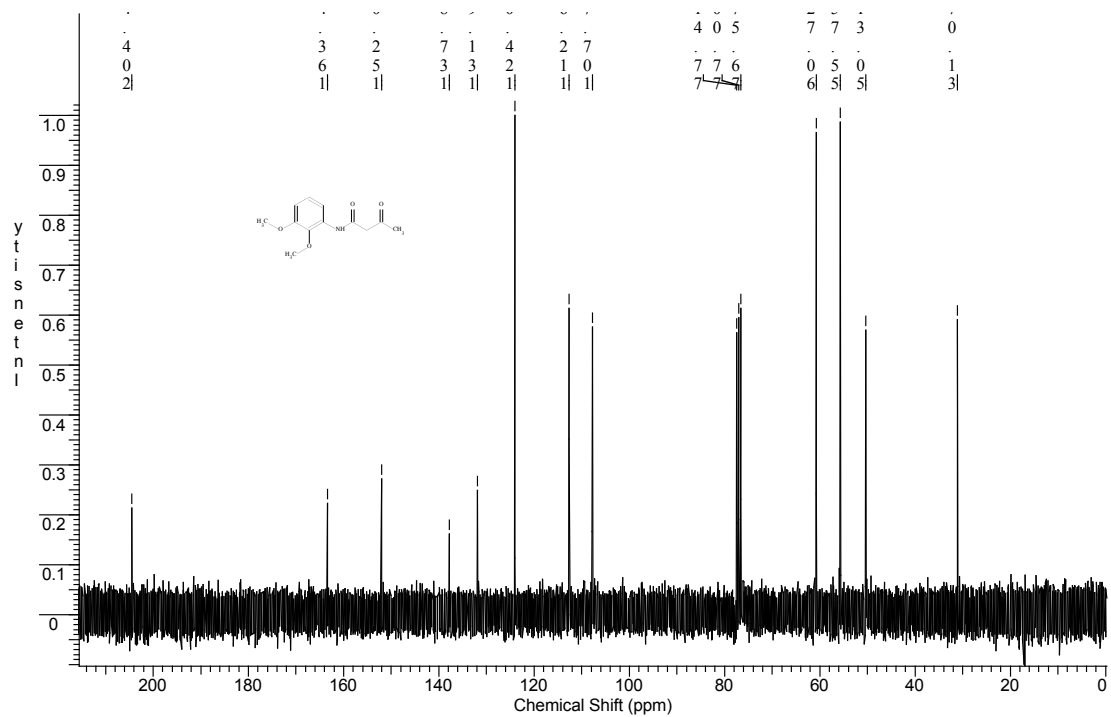

**<sup>13</sup>C NMR (CDCl<sub>3</sub>, 75 MHz) of Compound 10g**

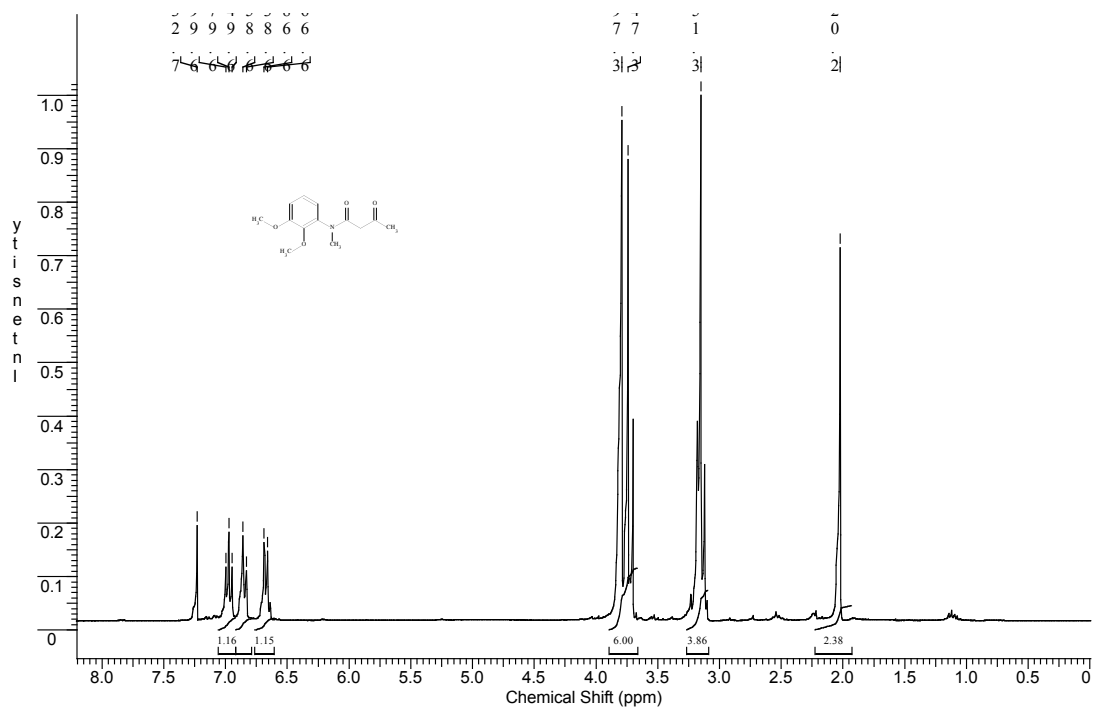

**<sup>1</sup>H NMR (CDCl<sub>3</sub>, 300 MHz) of Compound 10h**

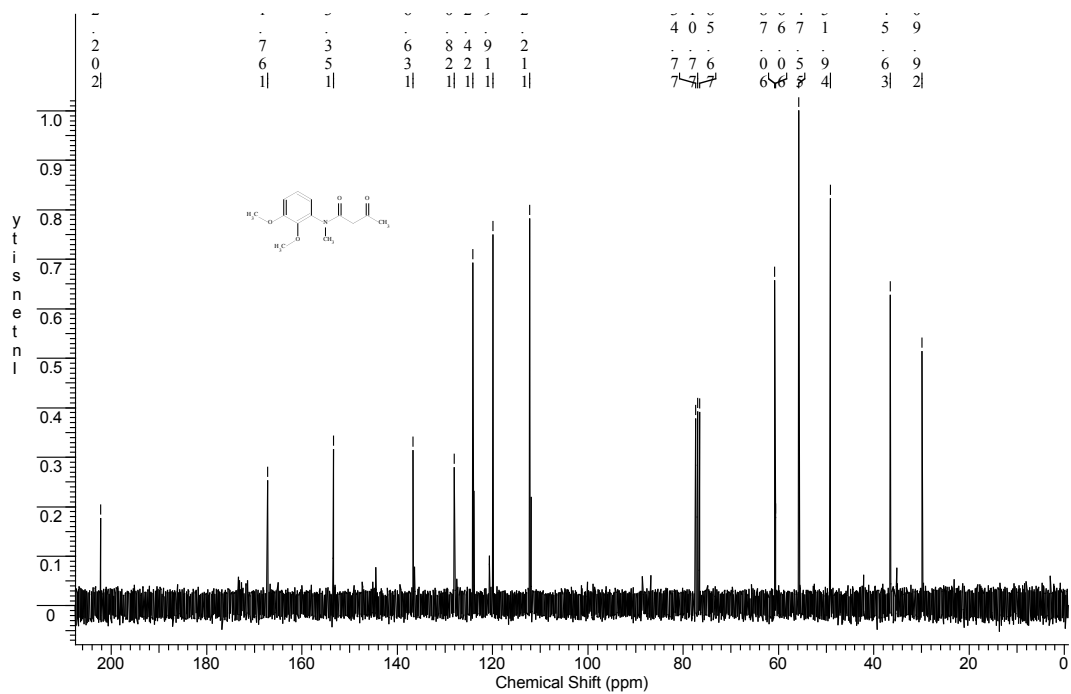

**<sup>13</sup>C NMR (CDCl<sub>3</sub>, 75 MHz) of Compound 10h**

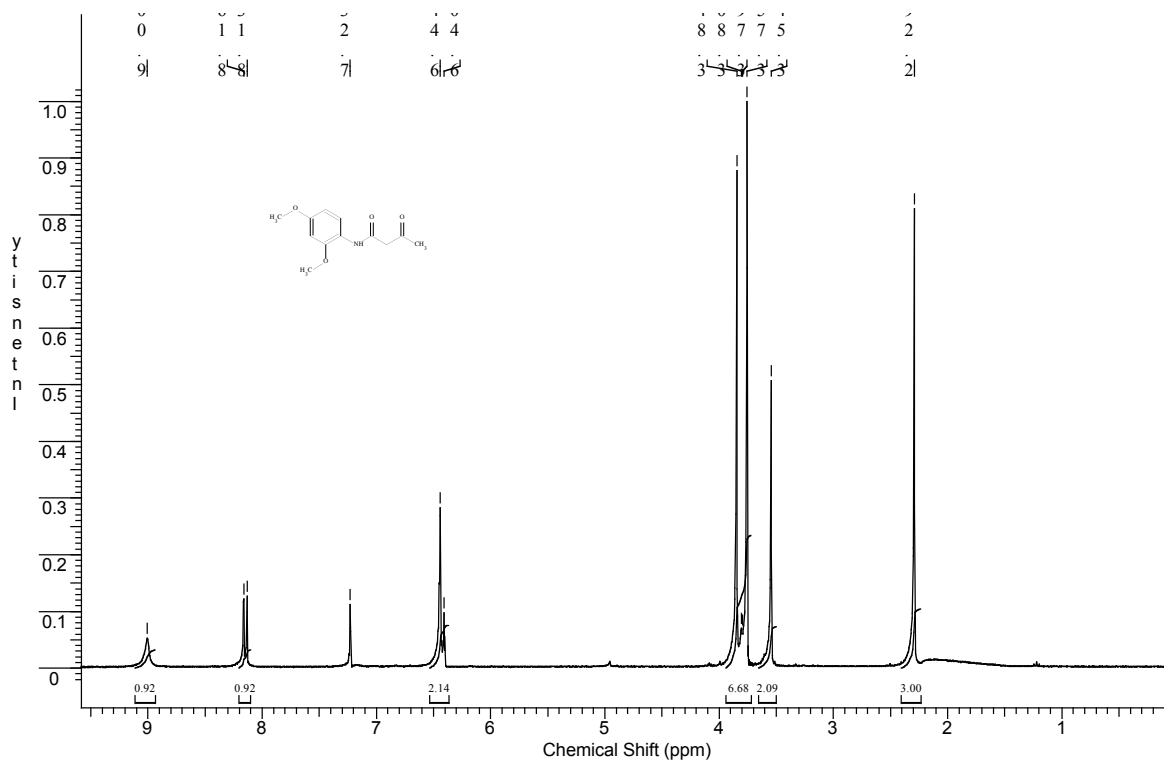

**<sup>1</sup>H NMR (CDCl<sub>3</sub>, 300 MHz) of Compound 10i**

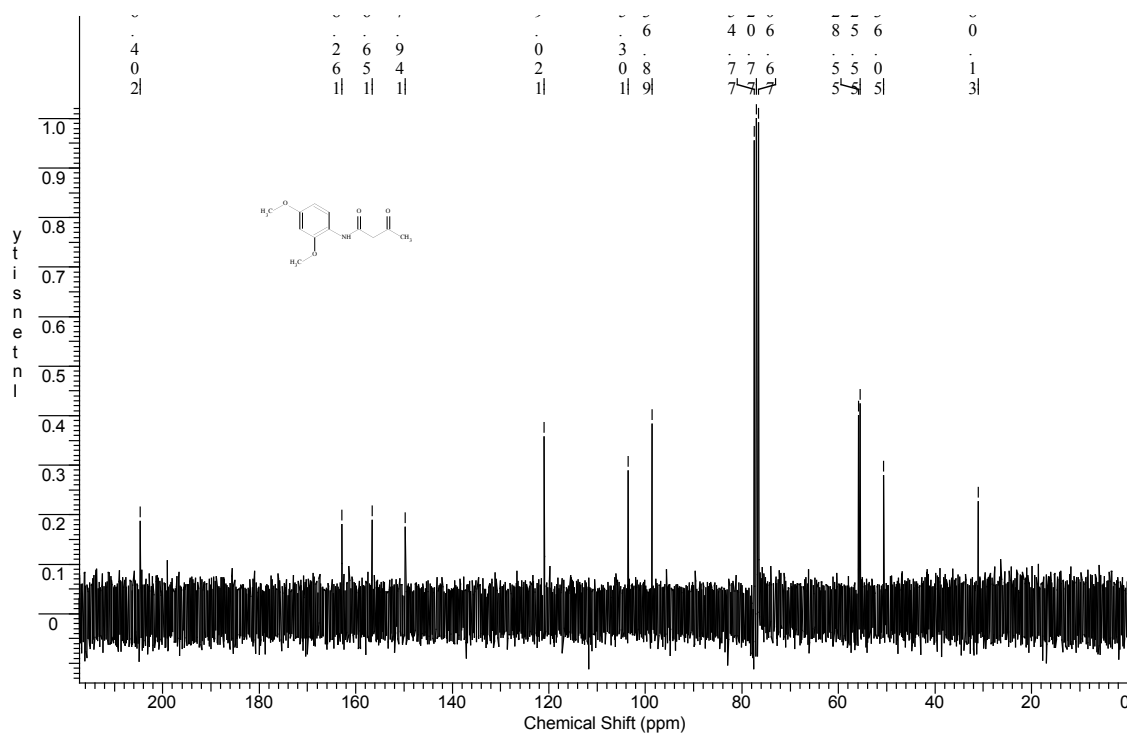

**<sup>13</sup>C NMR (CDCl<sub>3</sub>, 75 MHz) of Compound 10i**

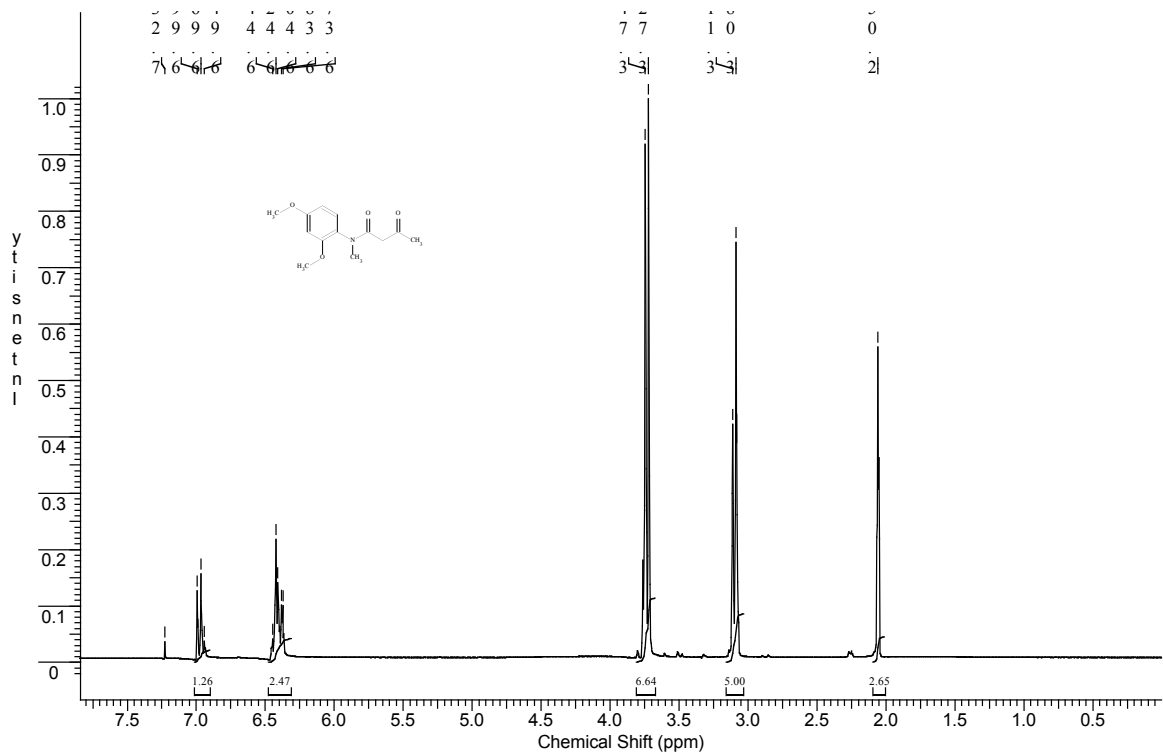

**<sup>1</sup>H NMR (CDCl<sub>3</sub>, 300 MHz) of Compound 10j**

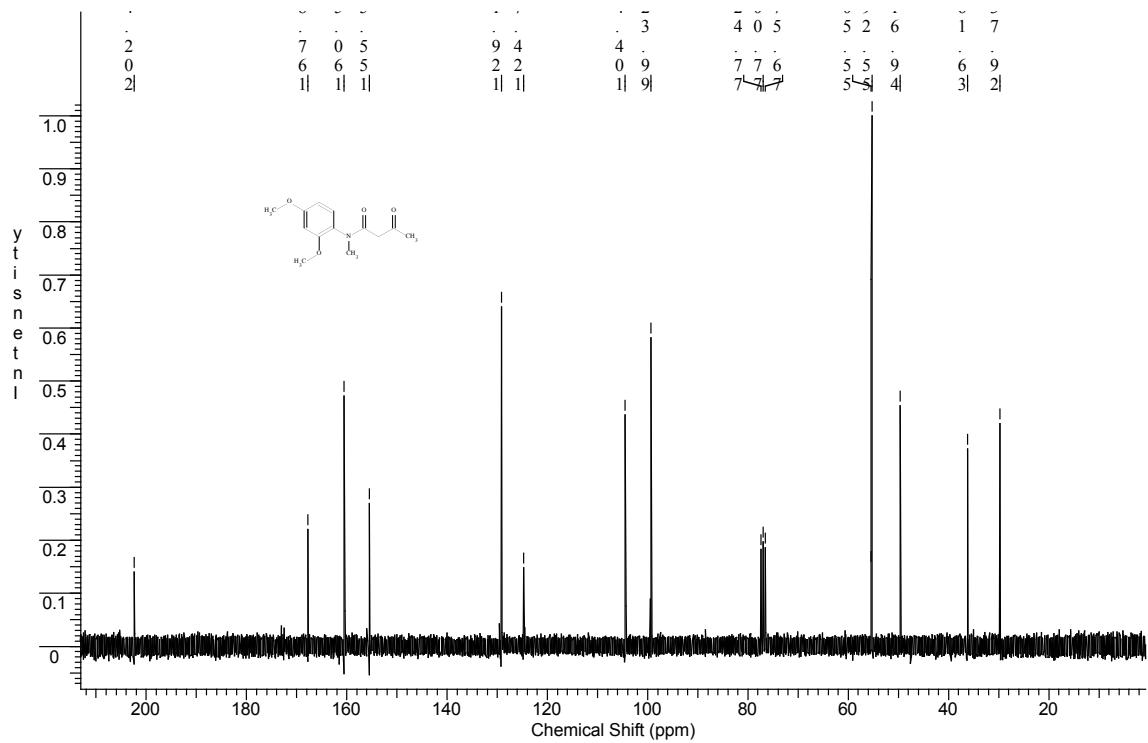

**<sup>13</sup>C NMR (CDCl<sub>3</sub>, 75 MHz) of Compound 10j**

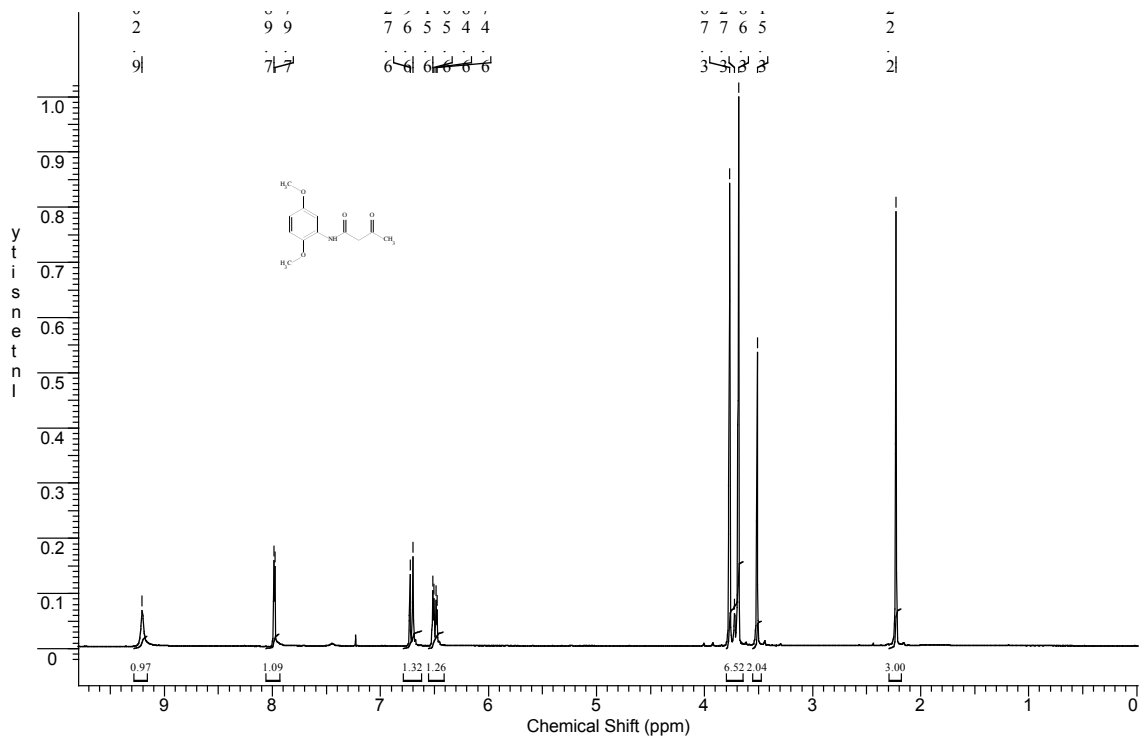

**<sup>1</sup>H NMR (CDCl<sub>3</sub>, 300 MHz) of Compound 10k**

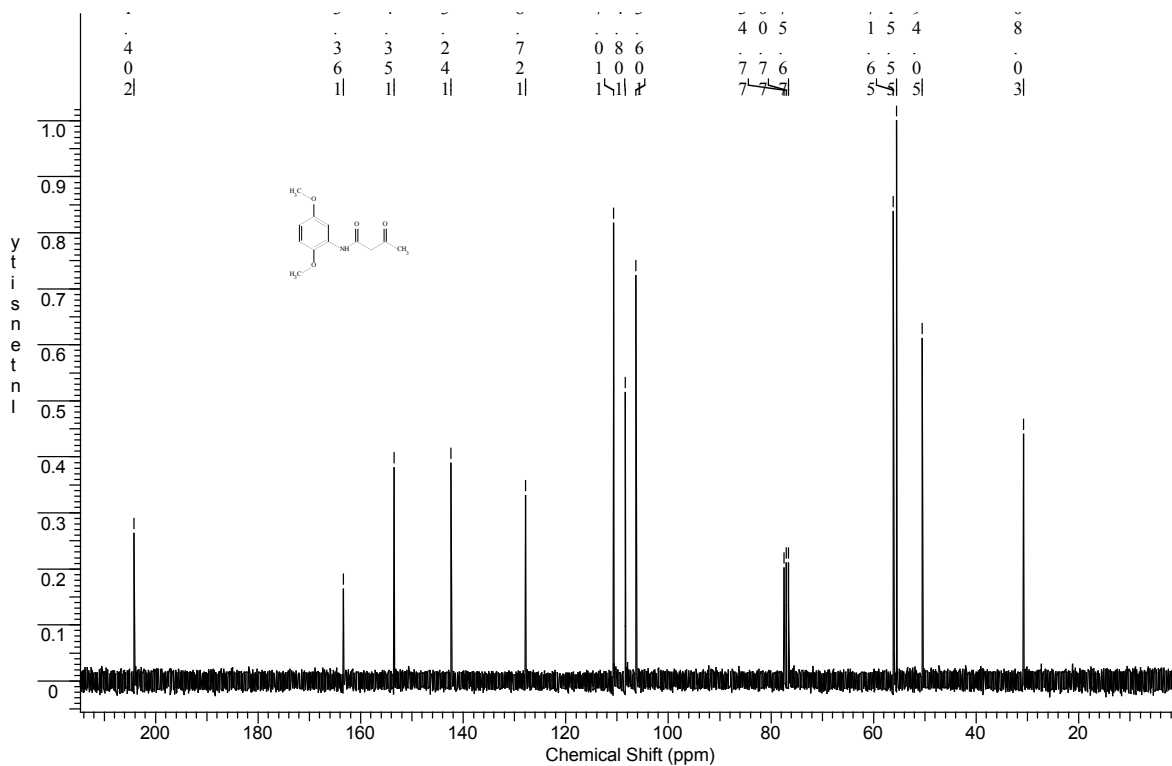

**<sup>13</sup>C NMR (CDCl<sub>3</sub>, 75 MHz) of Compound 10k**



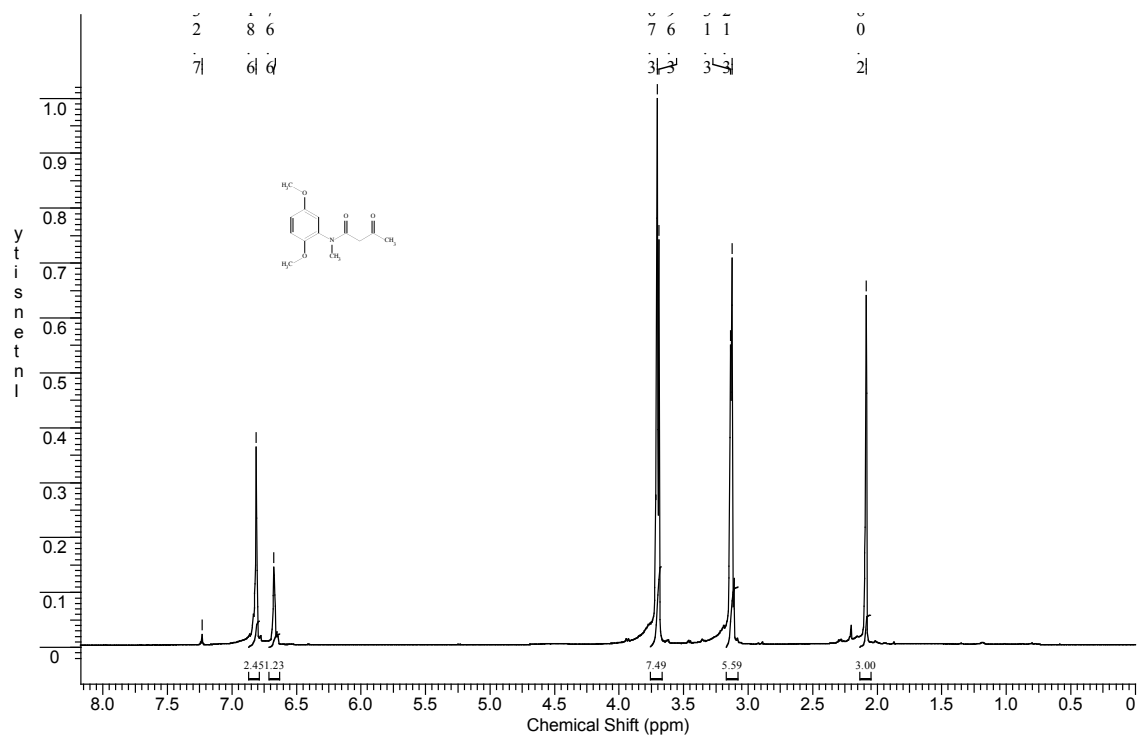

**<sup>1</sup>H NMR (CDCl<sub>3</sub>, 300 MHz) of Compound 10l**

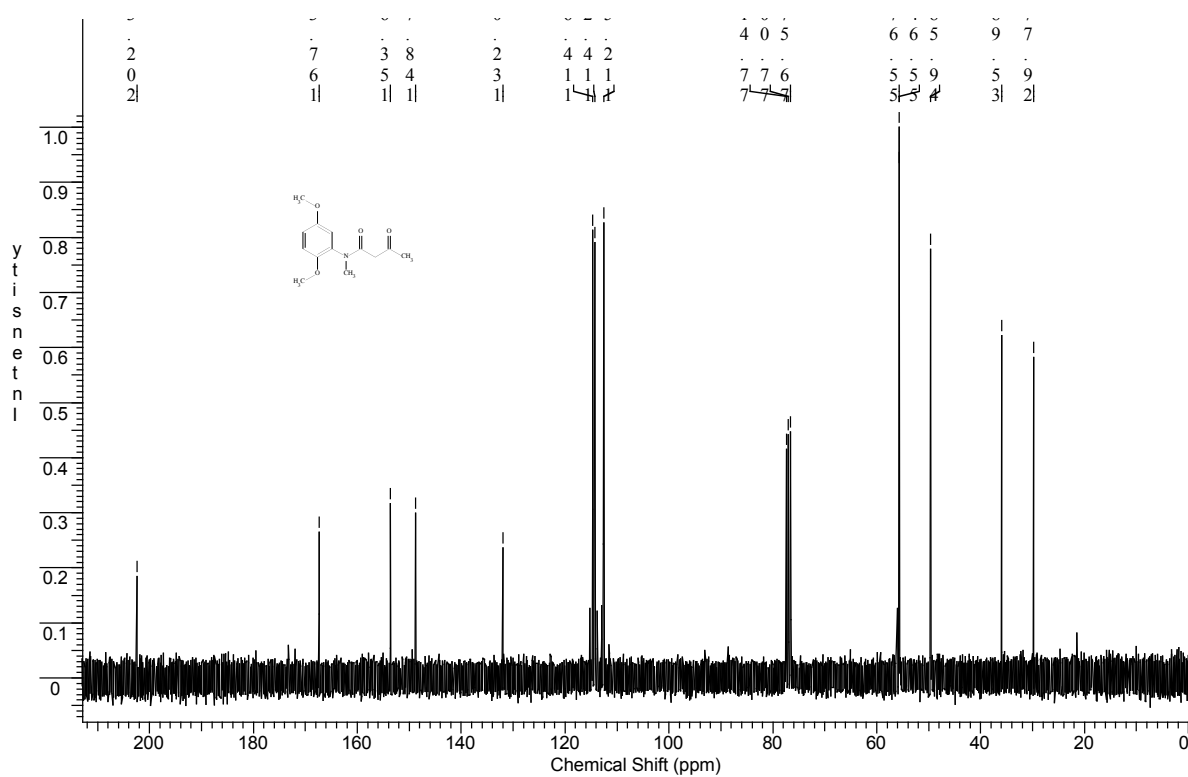

**<sup>13</sup>C NMR (CDCl<sub>3</sub>, 75 MHz) of Compound 10l**

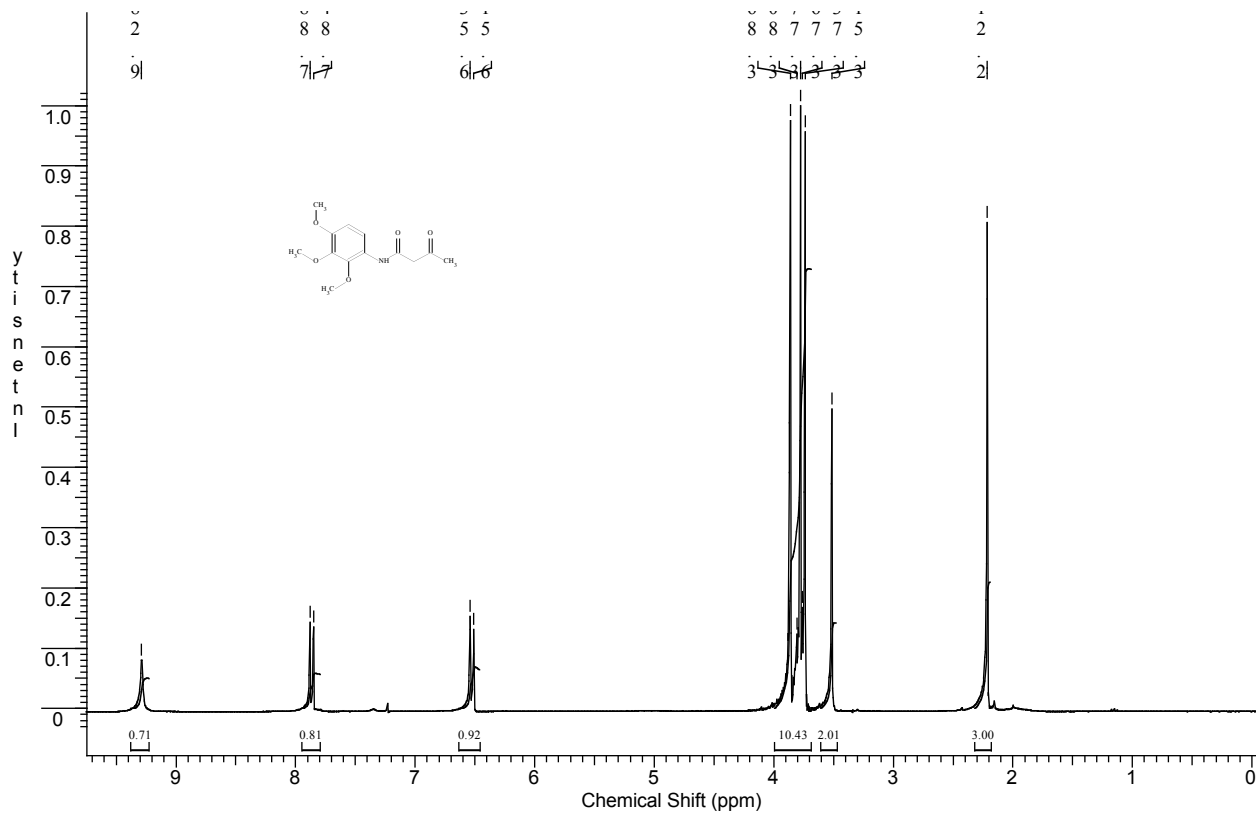

**<sup>1</sup>H NMR (CDCl<sub>3</sub>, 300 MHz) of Compound 10m**

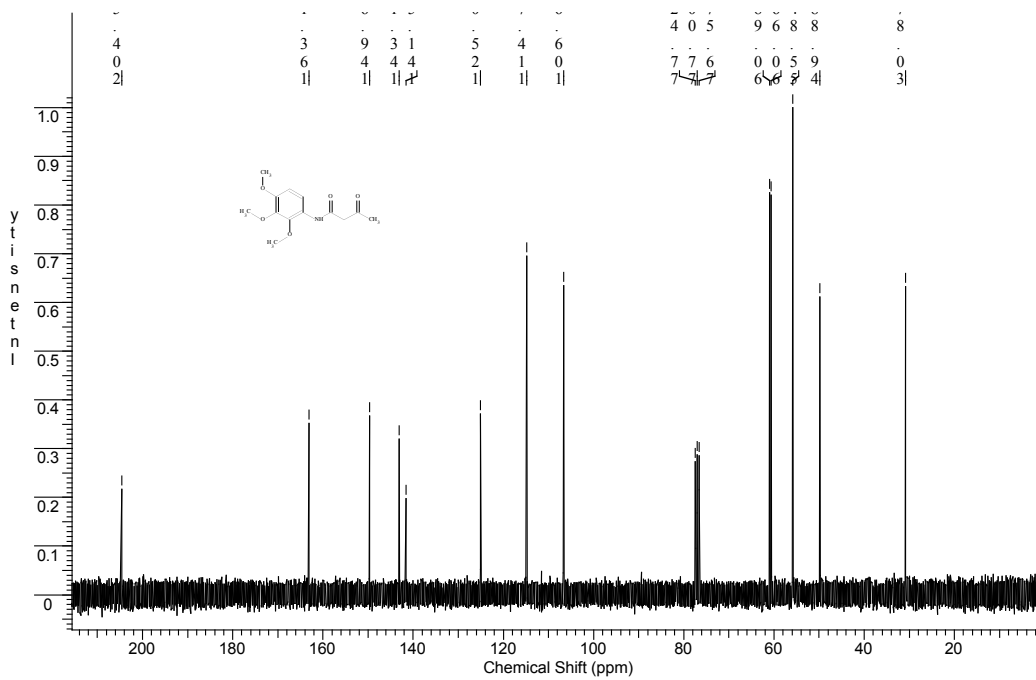

**<sup>13</sup>C NMR (CDCl<sub>3</sub>, 75 MHz) of Compound 10m**

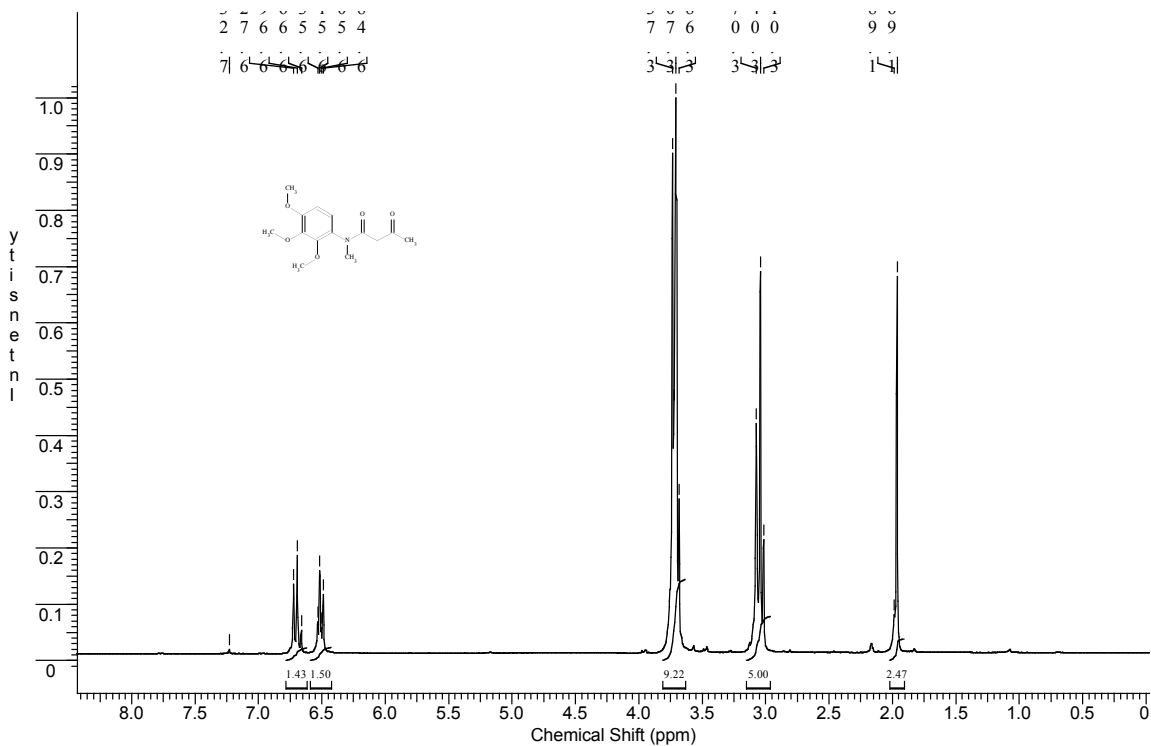

**<sup>1</sup>H NMR (CDCl<sub>3</sub>, 300 MHz) of Compound 10n**

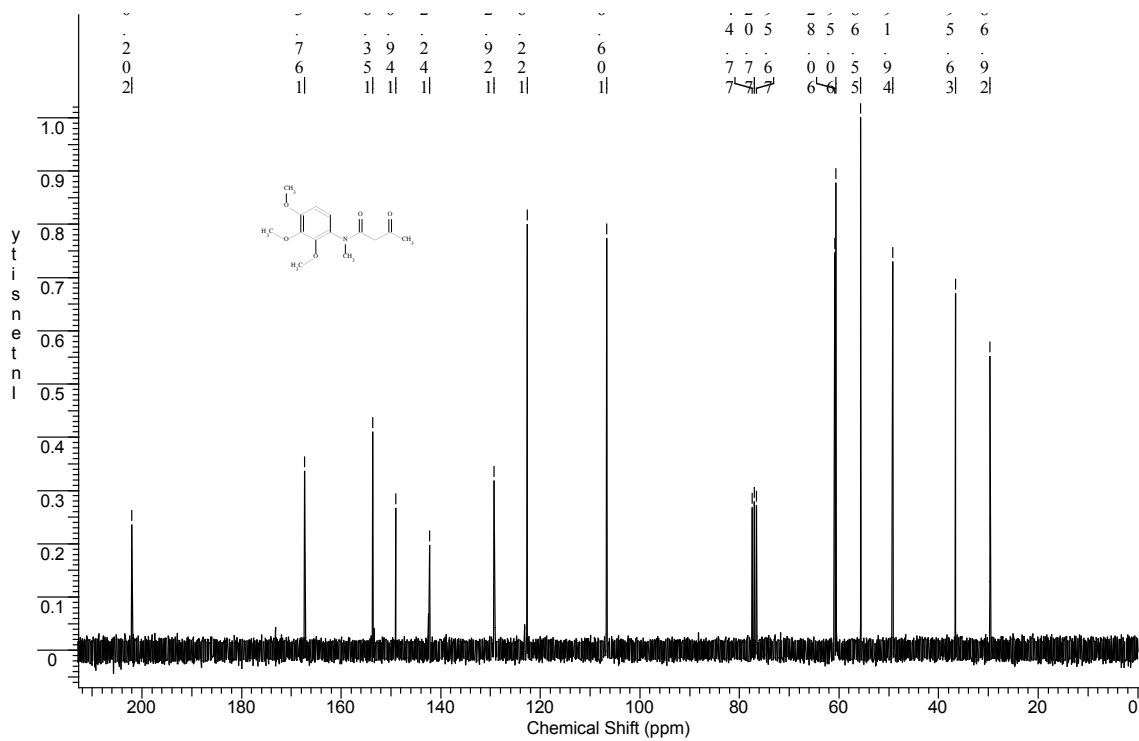

**<sup>13</sup>C NMR (CDCl<sub>3</sub>, 75 MHz) of Compound 10n**

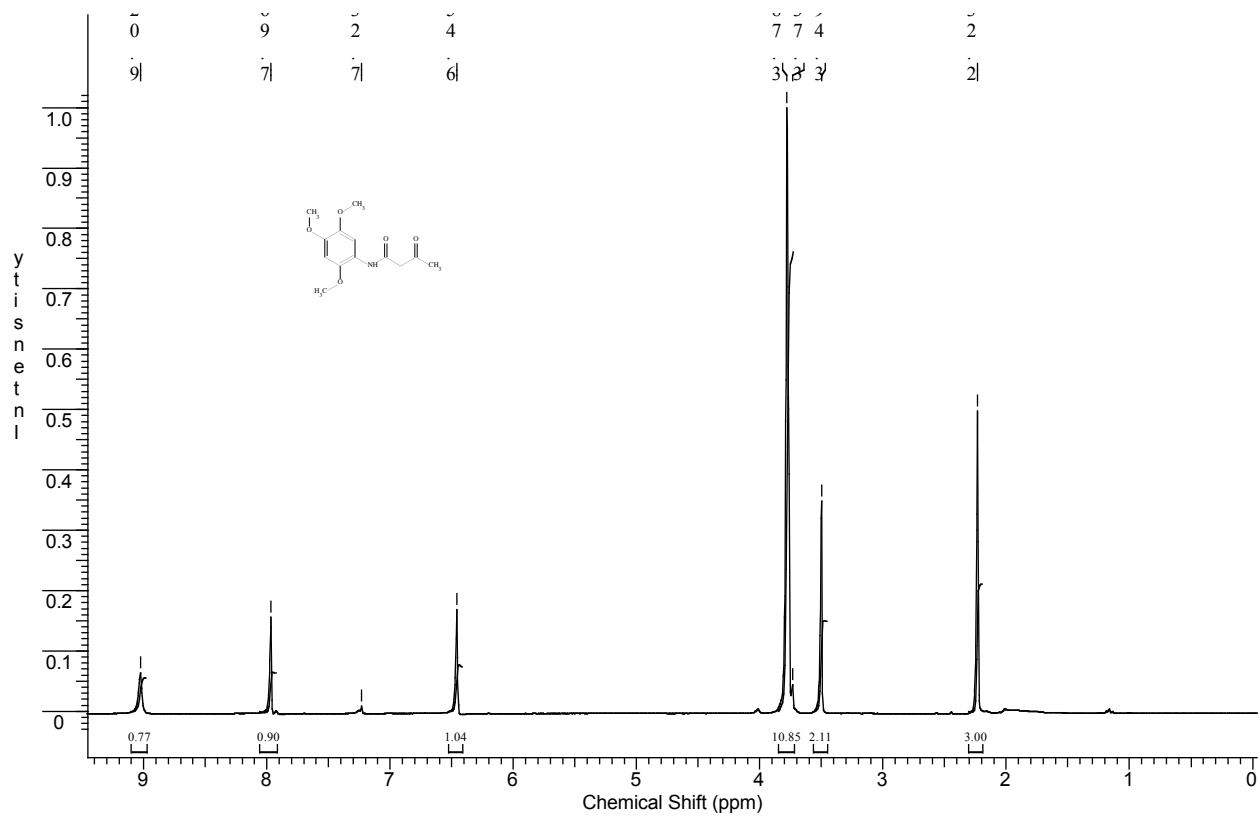

**<sup>1</sup>H NMR (CDCl<sub>3</sub>, 300 MHz) of Compound 10o**

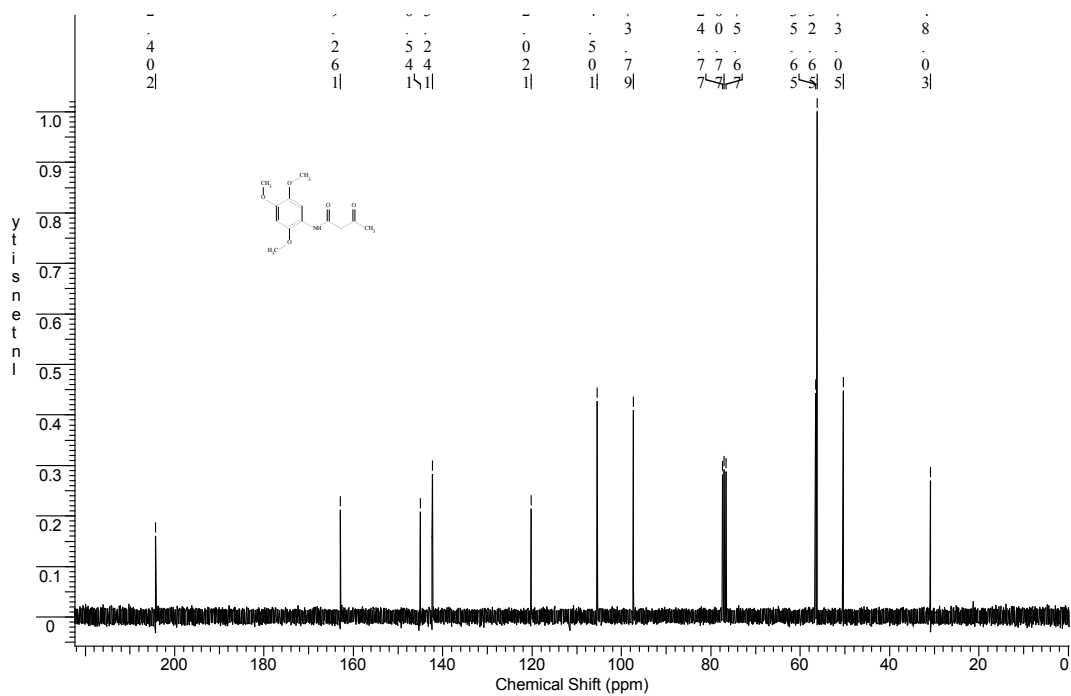

**<sup>13</sup>C NMR (CDCl<sub>3</sub>, 75 MHz) of Compound 10o**

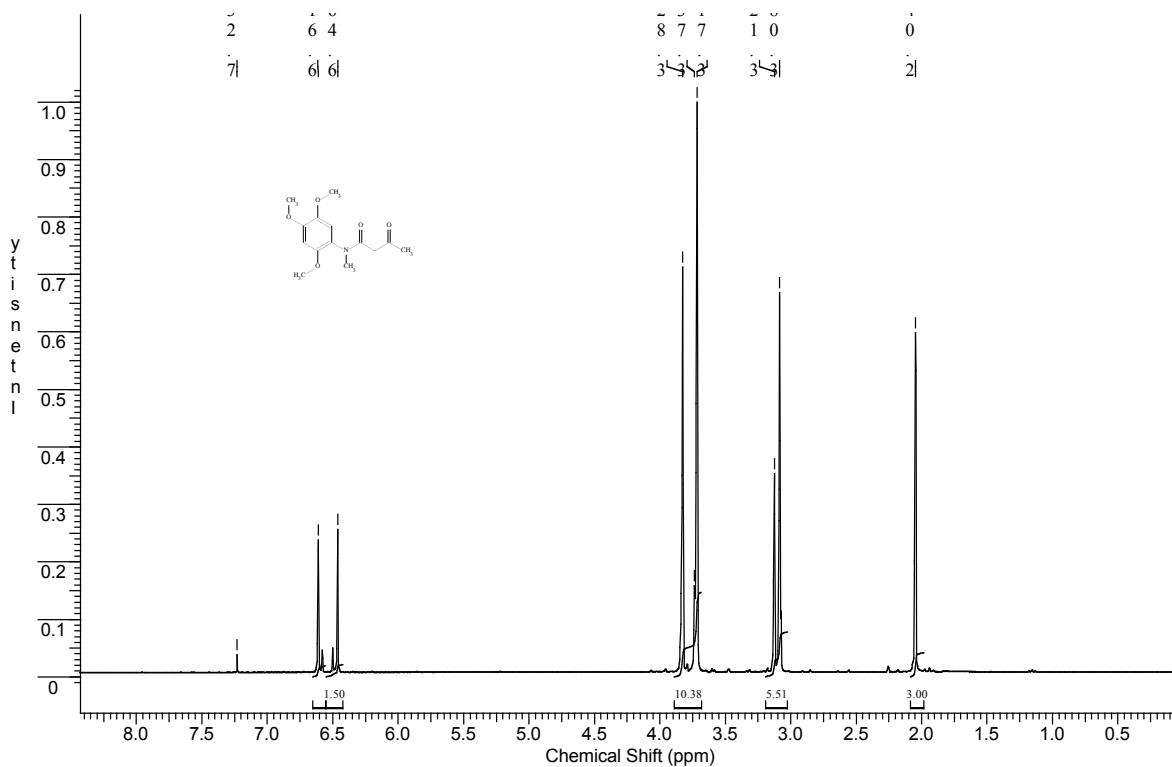

**<sup>1</sup>H NMR (CDCl<sub>3</sub>, 300 MHz) of Compound 10p**

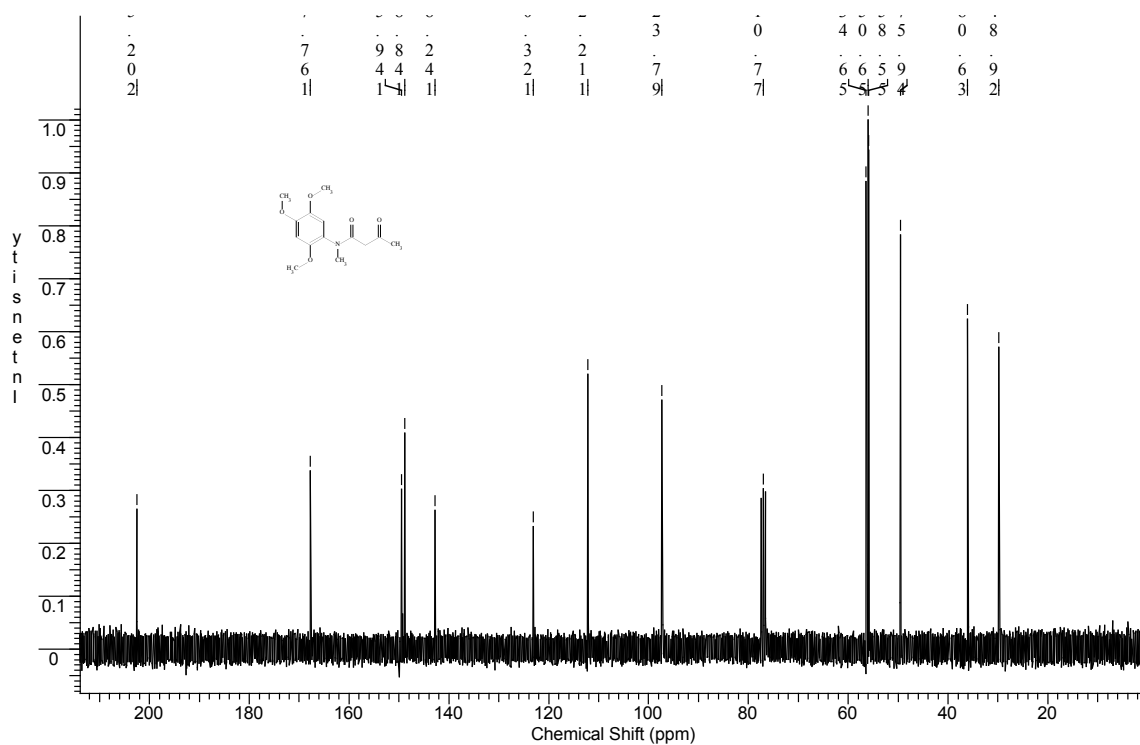

**<sup>13</sup>C NMR (CDCl<sub>3</sub>, 75 MHz) of Compound 10p**

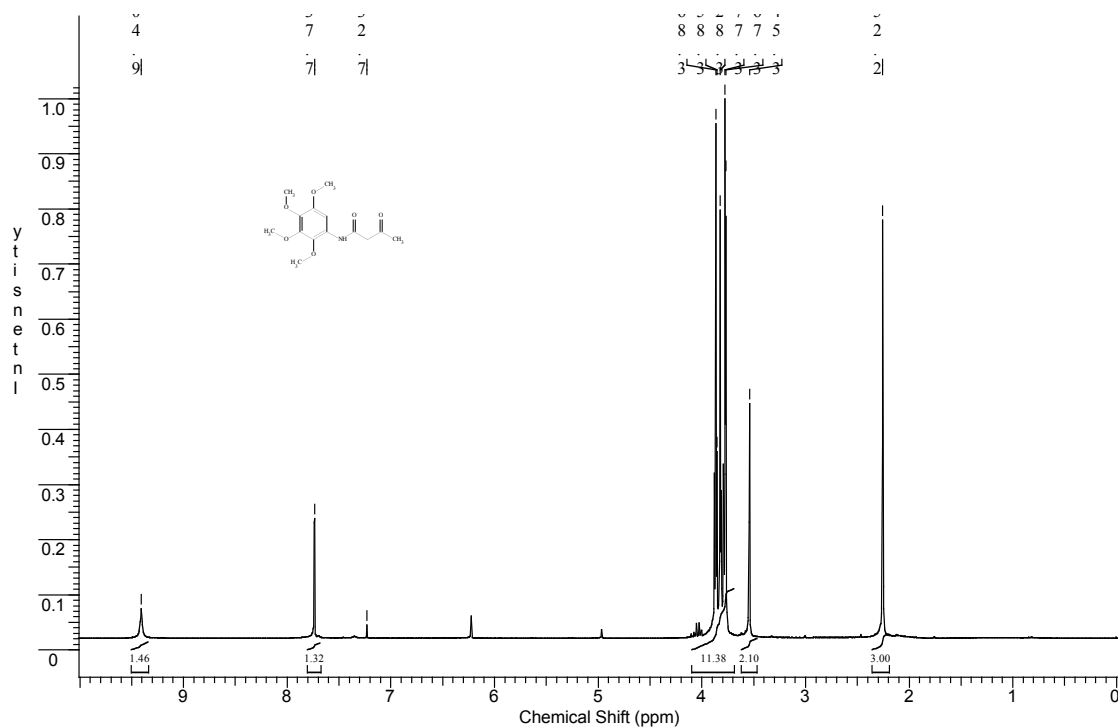

**<sup>1</sup>H NMR (CDCl<sub>3</sub>, 300 MHz) of Compound 10q**

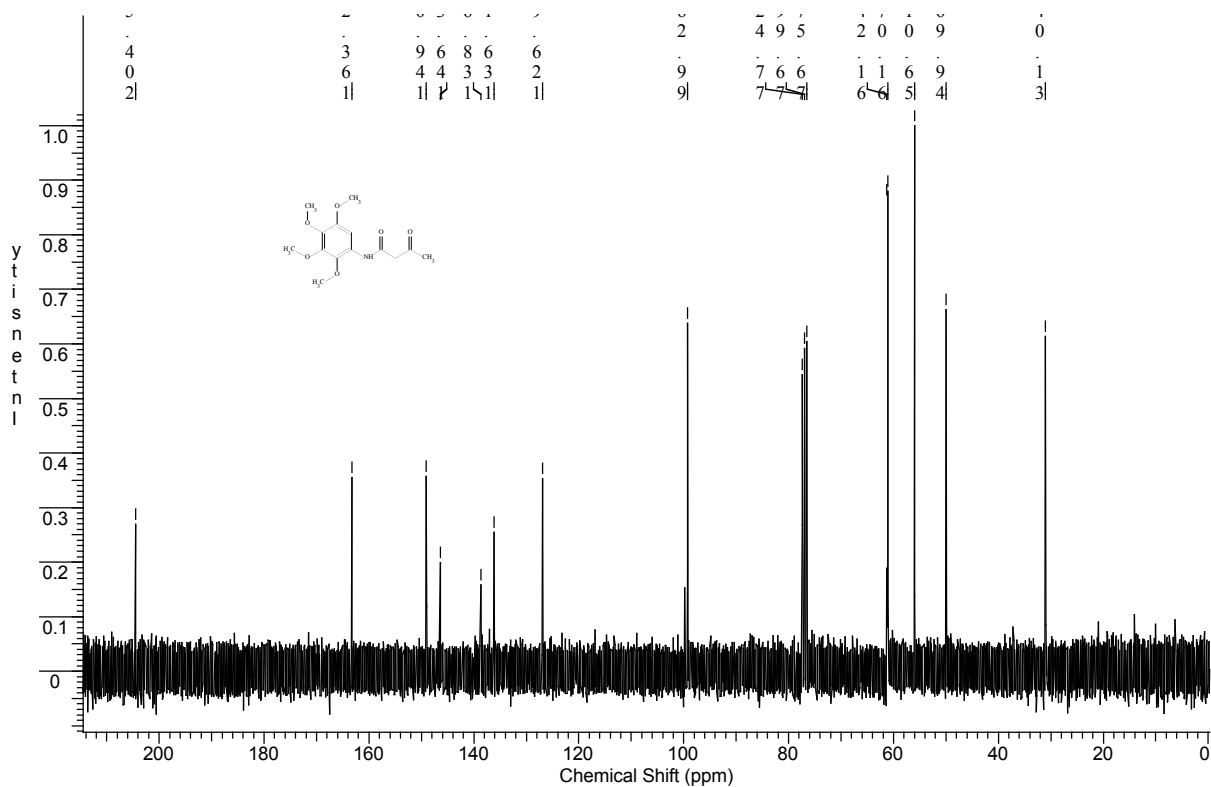

**<sup>13</sup>C NMR (CDCl<sub>3</sub>, 75 MHz) of Compound 10q**
